# Supplementary material for: HELIOS NAD-Seq: A Next-Generation Capture and Sequencing Protocol for NAD-Capped RNAs with Superior Targeting and Processing
Source: Research Square preprint supplement (doi:10.21203/rs.3.rs-7650670/v1), 2025-10-15
Supplement: Supplementary file 1 [file 5e64996dc77a2d70553f9c84.pdf]

Supplementary Material to:

**HELIOS NAD-Seq: A Next-Generation Capture and Sequencing Protocol for NAD-Capped RNAs with Superior Targeting and Processing**

Marvin Möhler<sup>a‡</sup>, Tae Wha Seong<sup>a‡</sup>, Frederik Weber<sup>a</sup>, Héctor Gabriel Morales Filloy<sup>a</sup>, Marleen Wölke<sup>a</sup>, Elif Tosun<sup>a</sup>, Edrea Mendonca<sup>a</sup>, Andrijana Crenner<sup>a</sup>, Yaqing Zhang<sup>a</sup>, Frank Preugschat<sup>b</sup>, Andres Jäschke<sup>a\*</sup>

Content:

|                                |          |
|--------------------------------|----------|
| Supplementary Figures S1 – S36 | page S2  |
| Supplementary Tables S1 – S10  | page S29 |
| Supplementary Methods          | page S78 |

## Supplementary Figures:

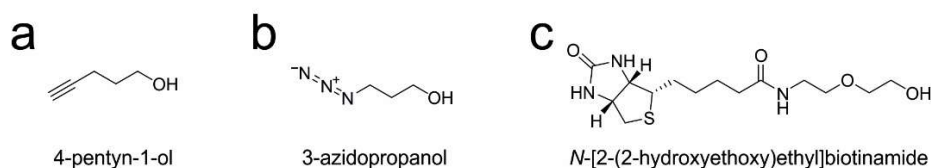

Figure S1: Chemical structures of currently applied substrates for ADPRC transglycosylation reactions of NAD-capped RNA. a) 4-pentyn-1-ol, applied in NAD captureSeq and NAD tagSeq. b) 3-azidopropanol, applied in NAD tagSeq II, SPAAC NAD-seq and NADcapPro. c) *N*-[2-(2-hydroxyethoxy)ethyl]biotinamide (HEEB), applied in ONE-seq and DO-seq.

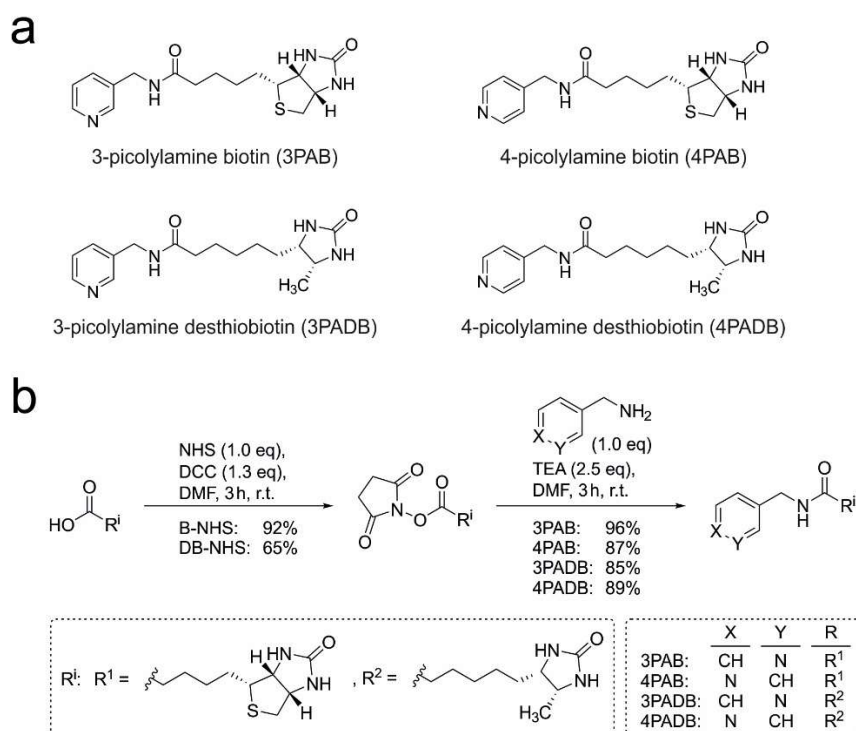

Figure S2: Chemical structures and synthesis of PAB conjugates as novel substrates for ADPRC transglycosylation reactions of NAD-capped RNA. a) Chemical structures of 3-picolylamine biotin (3PAB), 4-picolylamine biotin (4PAB), 3-picolylamine desthiobiotin (3PADB), and 4-picolylamine desthiobiotin (4PADB). b) Synthesis route for 3PAB, 4PAB, 3PADB, and 4PADB via NHS-ester activation of biotin (B-NHS) or desthiobiotin (DB-NHS) and amide coupling to 3- or 4-picolylamine.

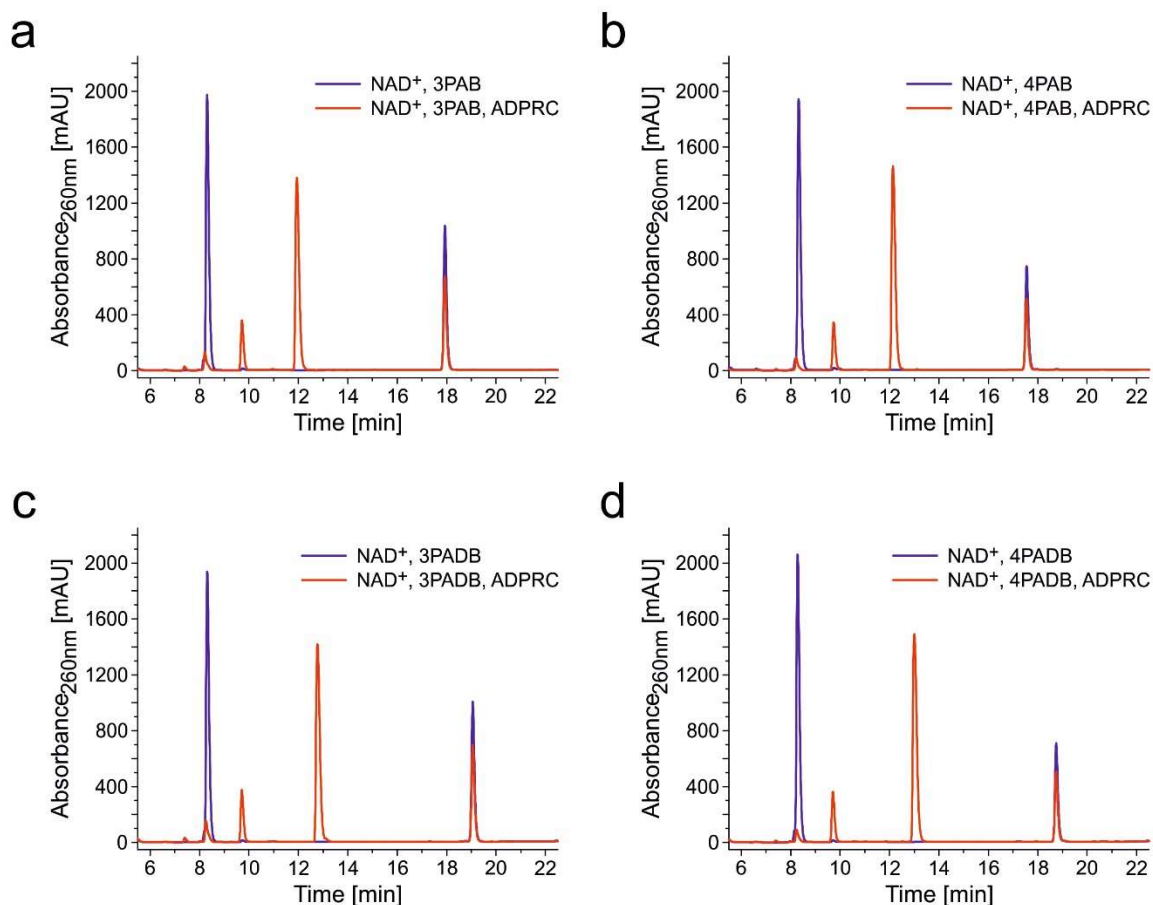

Figure S3: HPLC analysis after ADPRC transglycosylation reactions with  $\text{NAD}^+$  and different PAB conjugates. Chromatograms are shown for a reaction mixture with (red curve) and without ADPRC enzyme (blue curve), with the  $\text{NAD}^+$  peak at 8.5 min and the PAB or PADB conjugate peak between 17.5 and 19.0 min. The panels show reactions with a) 3PAB, b) 4PAB, c) 3PADB, and d) 4PADB. Close to quantitative conversion in the ADPRC-containing reactions (red curve) to the desired (desthio)biotinylated ADPR reaction products (peak between 12.0 and 13.0 min) and nicotinamide (peak at 10.0 min) was observed. Product identities were confirmed by HR-MS. ADPR-3PAB ( $\text{C}_{31}\text{H}_{43}\text{N}_9\text{O}_{15}\text{P}_2\text{S}$ ):  $m/z$  (ESI, positive) found 876.2118  $[\text{M}+\text{H}]^+$ , 898.1945  $[\text{M}+\text{Na}]^+$ , and  $m/z$  (ESI, negative) found 874.2005  $[\text{M}-\text{H}]^-$ . ADPR-4PAB ( $\text{C}_{31}\text{H}_{43}\text{N}_9\text{O}_{15}\text{P}_2\text{S}$ ):  $m/z$  (ESI, negative) found 874.2010  $[\text{M}-\text{H}]^-$ . ADPR-3PADB ( $\text{C}_{31}\text{H}_{45}\text{N}_9\text{O}_{15}\text{P}_2$ ):  $m/z$  (ESI, positive) found 846.2557  $[\text{M}+\text{H}]^+$ , 868.2376  $[\text{M}+\text{Na}]^+$ , and  $m/z$  (ESI, negative) found 844.2445  $[\text{M}-\text{H}]^-$ . ADPR-4PADB ( $\text{C}_{31}\text{H}_{45}\text{N}_9\text{O}_{15}\text{P}_2$ ):  $m/z$  (ESI, positive) found 846.2548  $[\text{M}+\text{H}]^+$ , 868.2364  $[\text{M}+\text{Na}]^+$ , and  $m/z$  (ESI, negative) found 844.2445  $[\text{M}-\text{H}]^-$ .

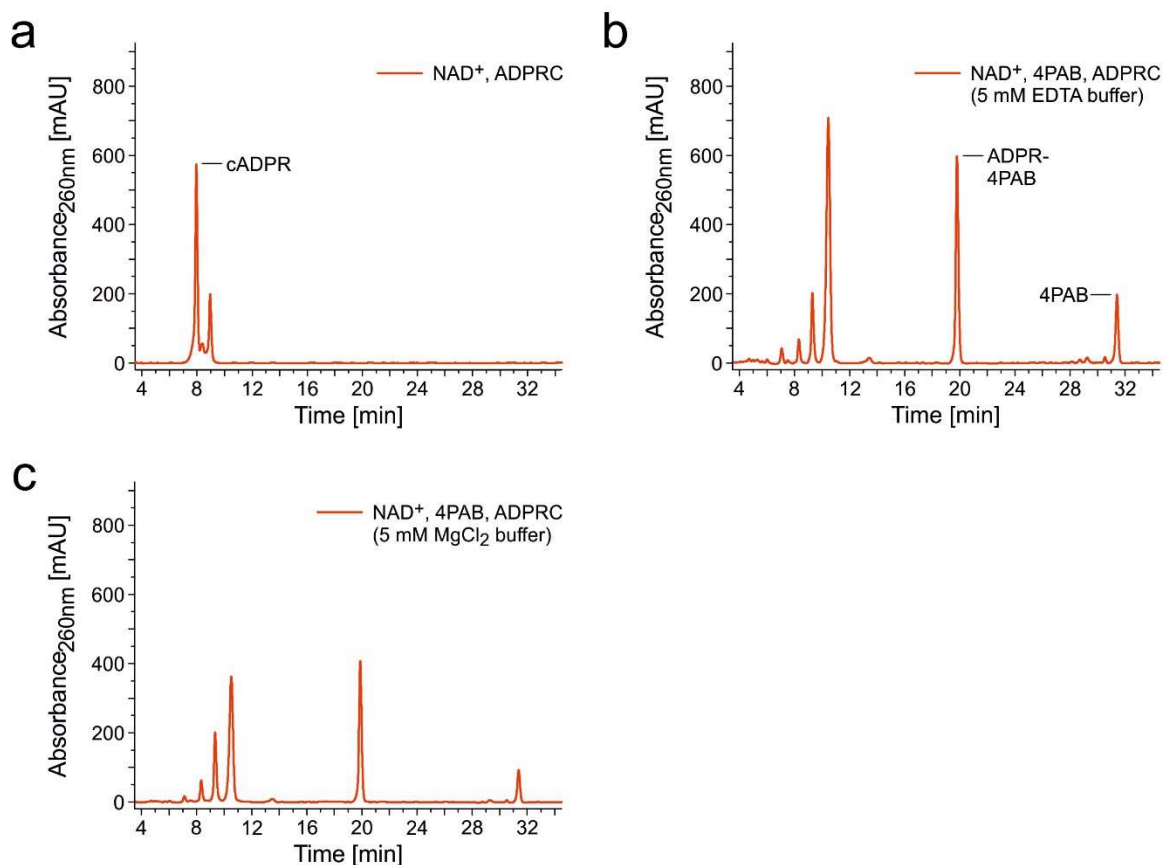

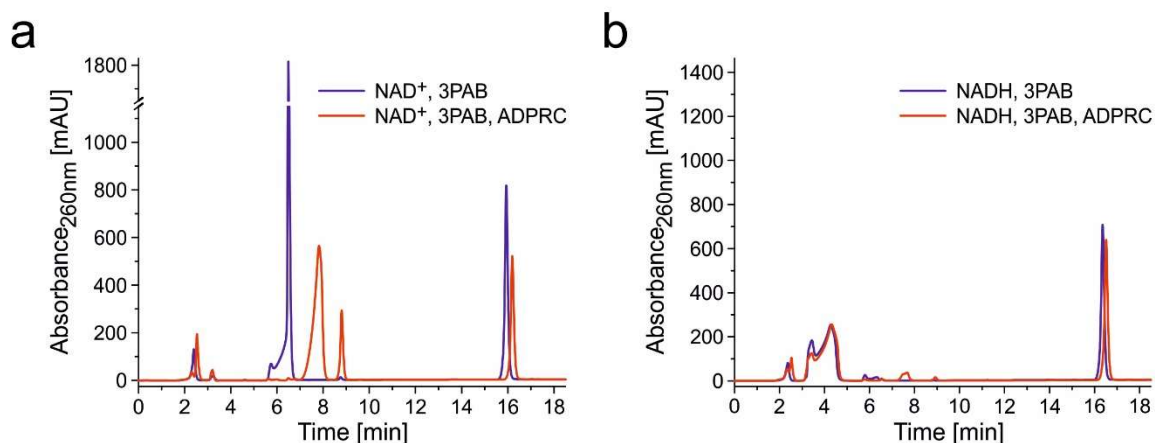

Figure S5: HPLC analysis after ADPRC transglycosylation reactions (30 min time-point) with 3PAB and NAD<sup>+</sup> or NADH. a) HPLC chromatogram for a reaction mixture with NAD<sup>+</sup> (peak at 5.5 – 6.5 min), which was accepted as a substrate to yield ADPR-3PAB (peak at 7.5 min). b) HPLC chromatogram for a reaction mixture with NADH (double peak at 3.0 – 4.0 min), which was not accepted as a substrate, but contained low amounts of the oxidation product NAD<sup>+</sup> (peak at 6.0 min), from which the corresponding amount of ADPR-3PAB (peak at 7.5 min) was formed. Product identities were confirmed by HR-MS.

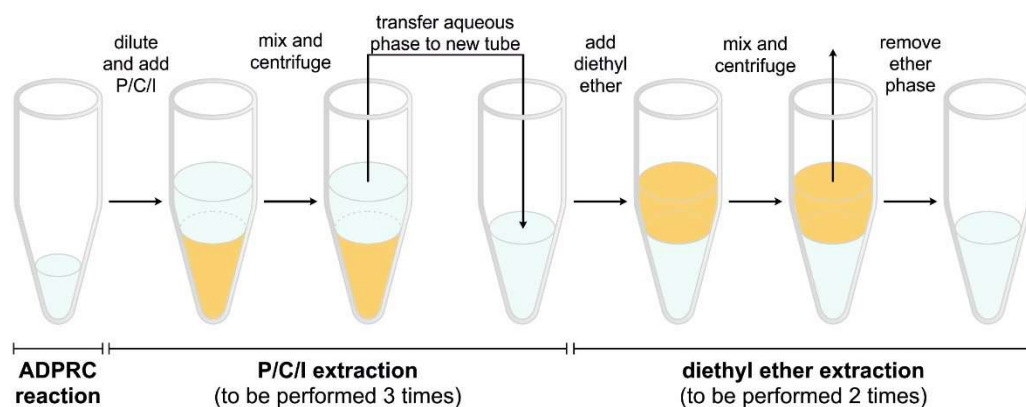

Figure S6: Quenching and extraction protocol after ADPRC transglycosylation reactions. The reactions are regularly performed with a volume <200  $\mu$ L in 1.5 mL reaction vessels. For quenching, a mixture of 300  $\mu$ L P/C/I and the corresponding amount of H<sub>2</sub>O to reach an equal volume of aqueous phase is added, and thoroughly mixed. The aqueous phase is extracted three times with P/C/I to remove ADPRC protein (interphase) and unreacted PAB conjugate (organic phase), and two times with diethyl ether. In each case, the phases are thoroughly mixed and separated again by centrifugation, before the upper phase is transferred into a new 1.5 mL vessel (aqueous phase) or discarded (organic phase). For better understanding, the aqueous phase is depicted with a light blue color, whereas the organic phases are shown in a light orange color.

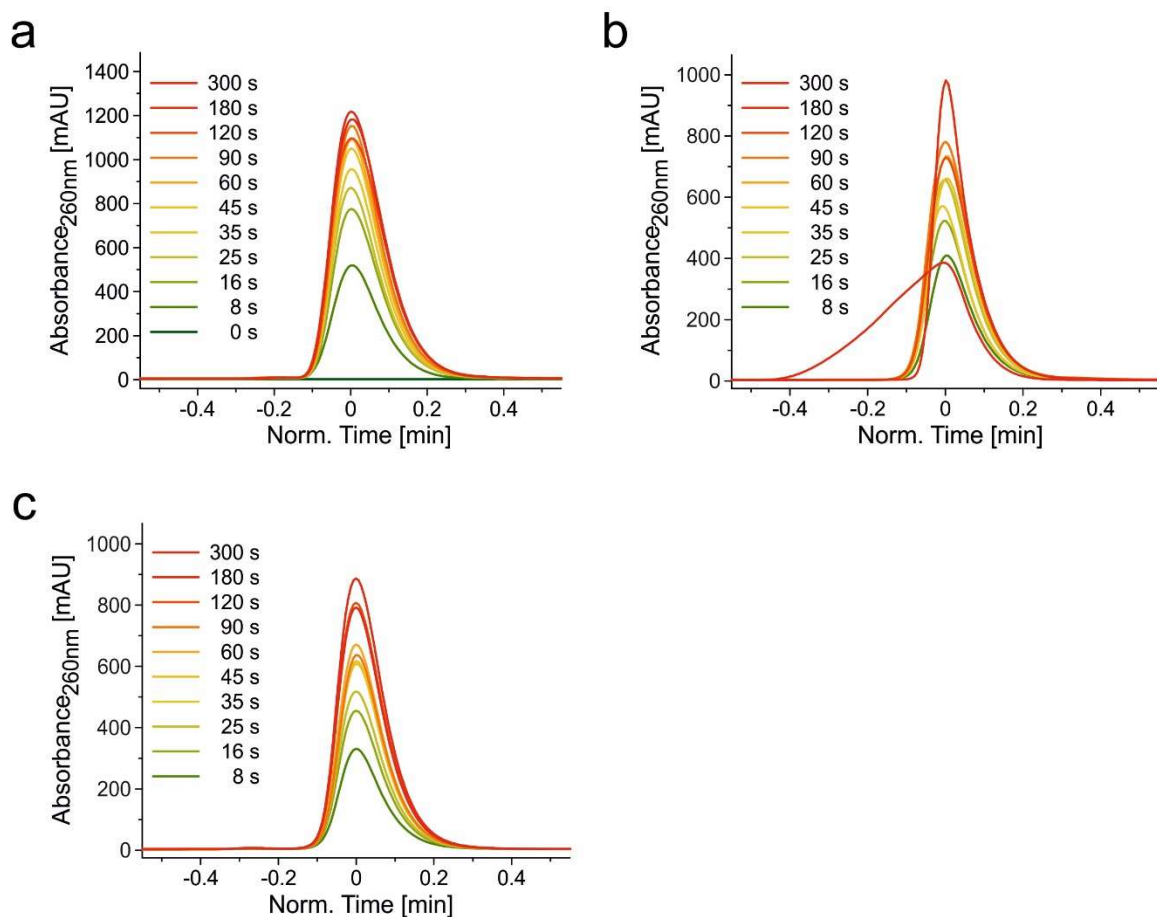

Figure S7: Kinetic analysis for ADPRC transglycosylation reactions with NAD<sup>+</sup> and PAB substrates following the preparation shown in Fig. 1f – HPLC analysis. HPLC chromatograms for a reaction mixture with 4PAB, 3PADB, or 4PADB showing an overlay of a) ADPR-4PAB, b) ADPR-3PADB, and c) ADPR-4PADB product peaks at different time-points of one reaction replicate, each.

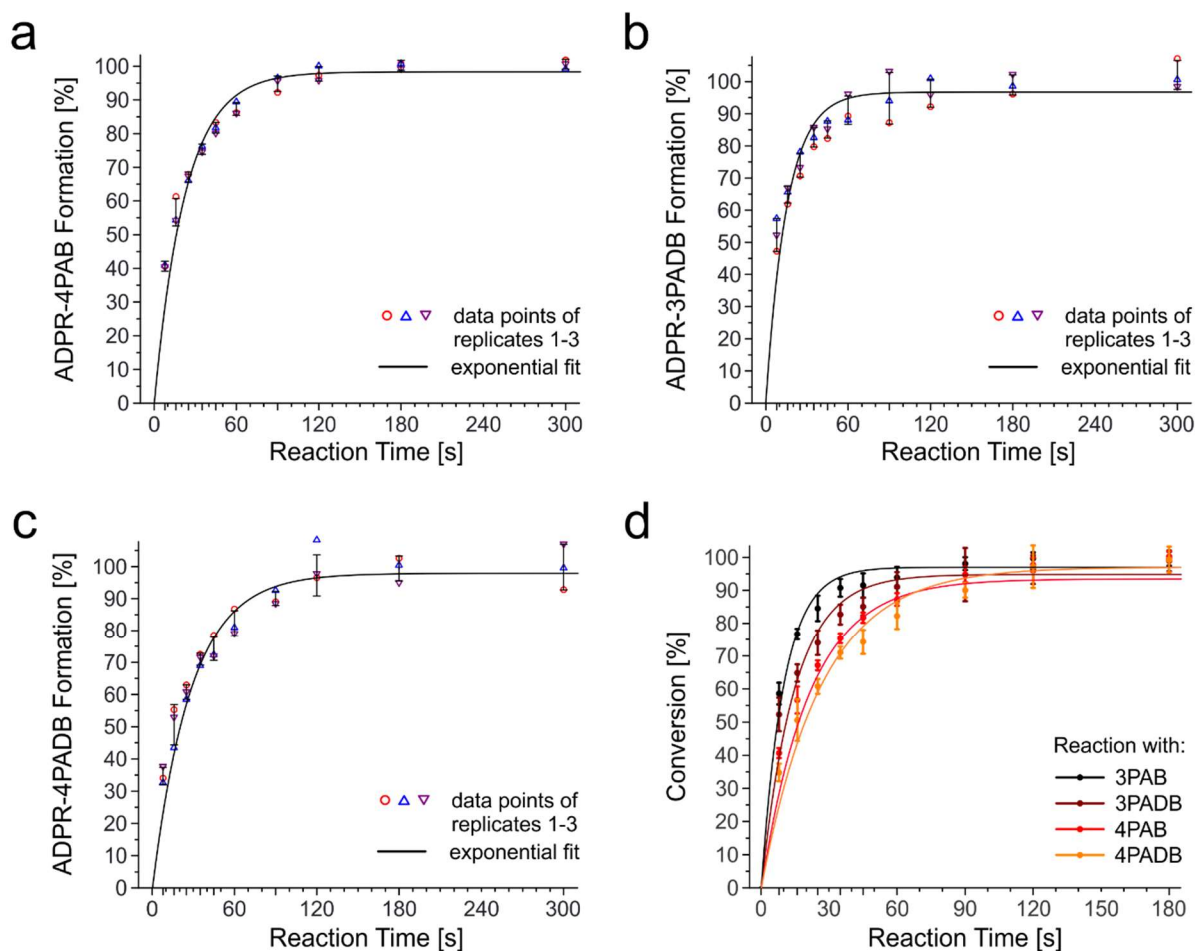

Figure S8: Results of the kinetic analysis for ADPRC transglycosylation reactions with  $\text{NAD}^+$  and PAB substrates, with a) ADPR-4PAB, b) ADPR-3PADB, and c) ADPR-4PADB formation data for each time-point of the reaction replicates plotted against reaction time, and exponential fitting applied (x-axis: large ticks represent time-points 8 s, 16 s, 25 s, 35 s, 45 s, 60 s, 90 s, 120 s, 180 s, 300 s). d) Comparison of the results of the kinetic analysis after exponential fitting. The reactivity of tested PAB substrates decreases in the order of  $3\text{PAB} > 3\text{PADB} > 4\text{PAB} > 4\text{PADB}$ . The  $k_{\text{cat}} / K_{\text{m}}$  values are  $7.59 \times 10^5 \text{ M}^{-1}\text{s}^{-1}$ ,  $5.16 \times 10^5 \text{ M}^{-1}\text{s}^{-1}$ ,  $3.52 \times 10^5 \text{ M}^{-1}\text{s}^{-1}$ ,  $2.81 \times 10^5 \text{ M}^{-1}\text{s}^{-1}$  respectively.

**a**

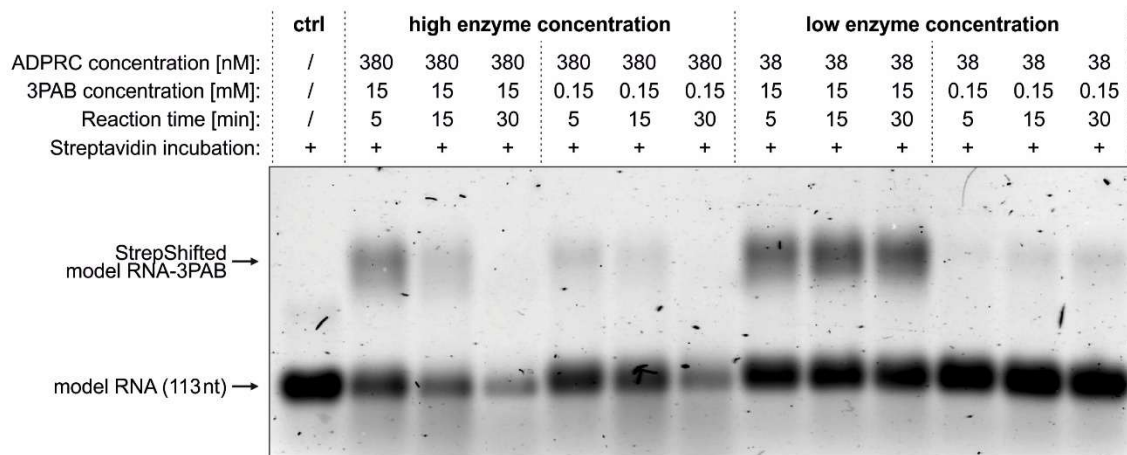

**b**

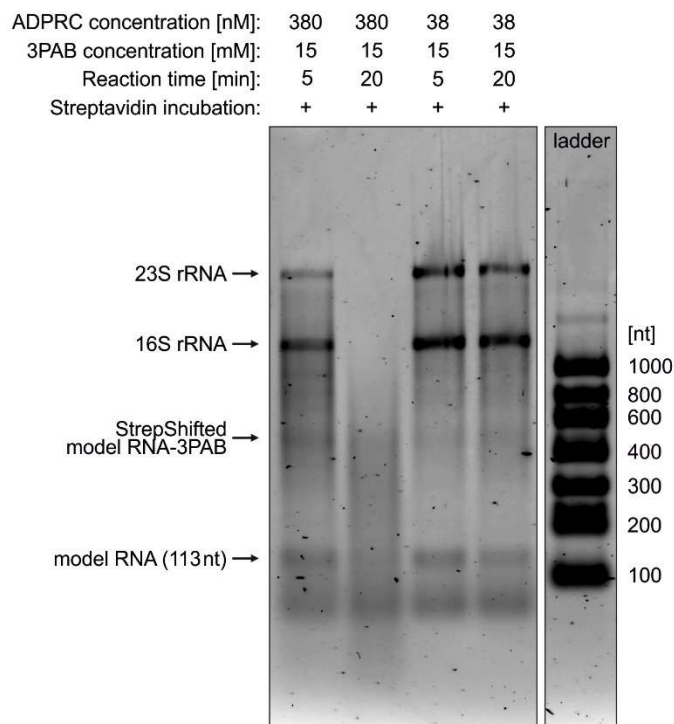

Figure S9: Optimization of the enzyme concentration in ADPRC transglycosylation reactions with 3PAB and RNA. a) StrepShift analysis on 2% agarose gel after ADPRC reactions starting from 5  $\mu$ g (or 136 pmol) of a 113 nt model RNA ( $\sim$ 1:1 NAD/pppRNA) with varied enzyme concentrations (380 nM, 38 nM), 3PAB concentrations (15 mM, 150 nM), and reaction times (5 min, 15 min, 30 min). b) StrepShift analysis on 2% agarose gel after ADPRC reactions starting from 0.5  $\mu$ g of a 113 nt model RNA ( $\sim$ 1:1 NAD/pppRNA) and 4.5  $\mu$ g of *E. coli* total RNA with varied enzyme concentrations (380 nM, 38 nM) and reaction times (5 min, 20 min), and a 3PAB concentration of 15 mM. The conditions of choice with a fast conversion to the biotinylated RNA product and low degradation for all tested RNA mixtures and reaction times were found at an ADPRC concentration of 38 nM and a 3PAB concentration of 15 mM.



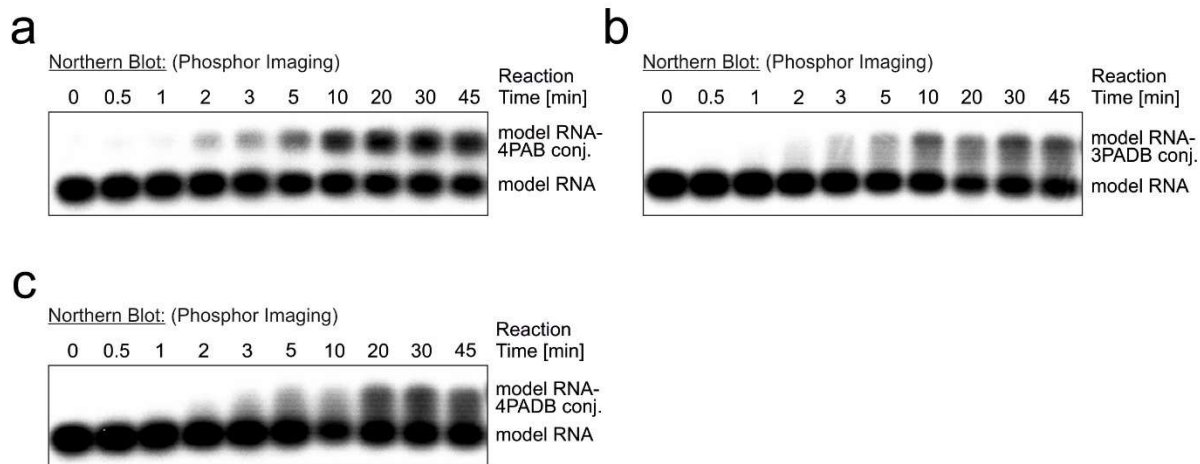

Figure S10: Kinetic analysis for ADPRC transglycosylation reactions (triplicates) with NAD-RNA (113 nt model RNA: 47.9% NAD-capped) and PAB substrates following the preparation shown in Fig. 1j – StrepShift analysis. Northern blots for a reaction mixture with 4PAB, 3PADB, or 4PADB showing the shifted a) 4PAB-modified, b) 3PADB-modified, and c) 4PADB-modified NAD-RNA bands at different time-points of one reaction replicate, each.

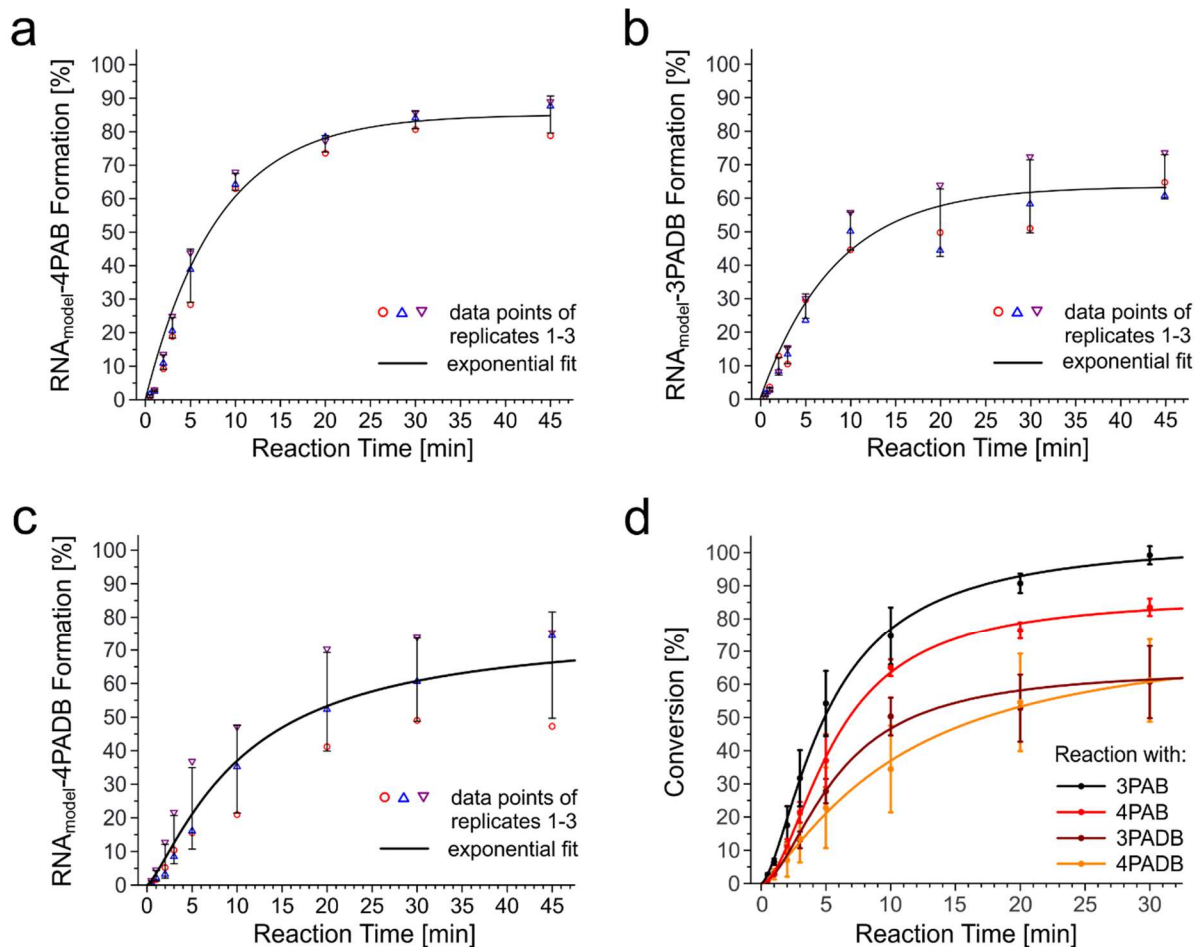

Figure S11: Results of the kinetic analysis for ADPRC transglycosylation reactions with NAD-RNA (113 nt model RNA: 47.9% NAD-capped) and PAB substrates, with product formation data for a) 4PAB-modified, b) 3PADB-modified, and c) 4PADB-modified RNAIII leader for each time-point of the reaction replicates plotted against reaction time, and exponential fitting applied. d) Comparison of the results of the kinetic analysis after exponential fitting. The reactivity of tested PAB substrates decreases in the order of 3PAB > 4PAB > 3PADB > 4PADB. The  $k_{cat} / K_m$  values are  $6.17 \times 10^5 \text{ M}^{-1}\text{s}^{-1}$ ,  $5.47 \times 10^5 \text{ M}^{-1}\text{s}^{-1}$ ,  $5.25 \times 10^5 \text{ M}^{-1}\text{s}^{-1}$ ,  $3.43 \times 10^5 \text{ M}^{-1}\text{s}^{-1}$  respectively.

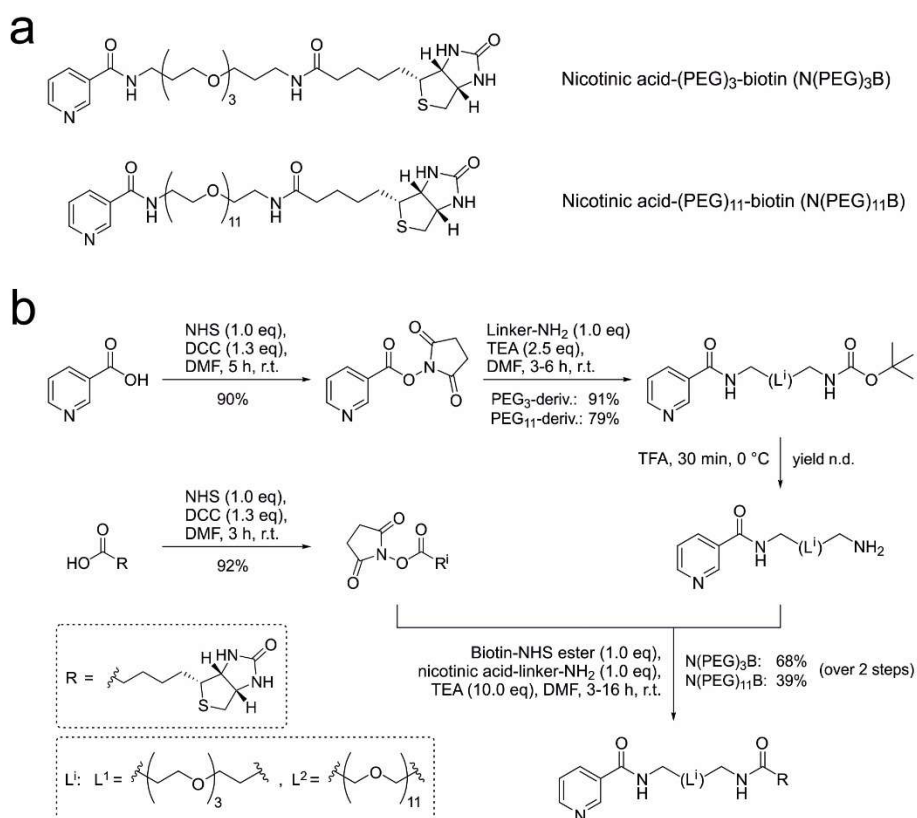

Figure S12: Chemical structures and synthesis of N(PEG)<sub>x</sub>B conjugates as substrates for ADPRC transglycosylation based on 3PAB, but with extended polyethylene glycol (PEG) linkers. a) Chemical structures of nicotinic acid-(PEG)<sub>3</sub>-biotin (N(PEG)<sub>3</sub>B) and nicotinic acid-(PEG)<sub>11</sub>-biotin (N(PEG)<sub>11</sub>B). b) Synthesis route for N(PEG)<sub>3</sub>B and N(PEG)<sub>11</sub>B via NHS-ester activation of nicotinic acid (N-NHS) and biotin (B-NHS) and subsequent amide coupling to both ends of the initially Boc-protected linker molecules.

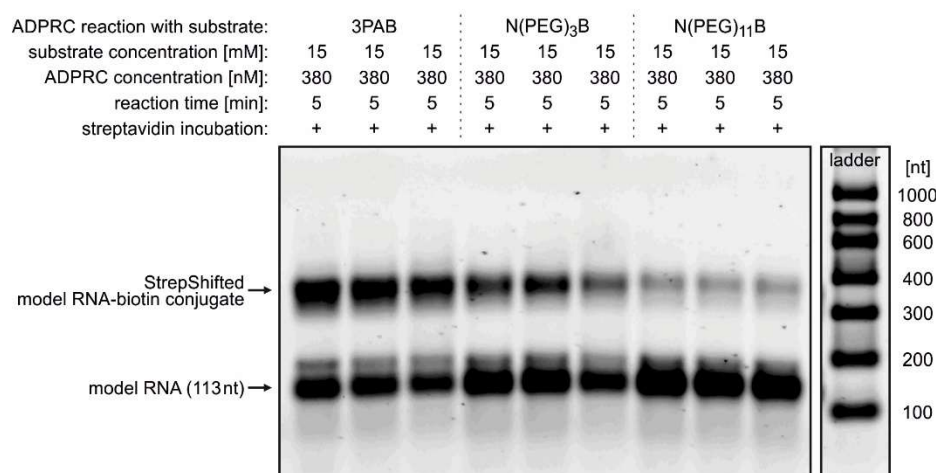

Figure S13: StrepShift analysis on 2% agarose gel after ADPRC reactions (triplicates) with nucleophilic substrates of varied linker length (3PAB, N(PEG)<sub>3</sub>B, N(PEG)<sub>11</sub>B) starting from 5 µg (or 136 pmol) of a 113 nt model RNA (~1:1 NAD/pppRNA) with depicted concentrations and reaction times shows a decrease in biotinylation efficiency with increasing linker length.

### Set of Internal RNA Standards:

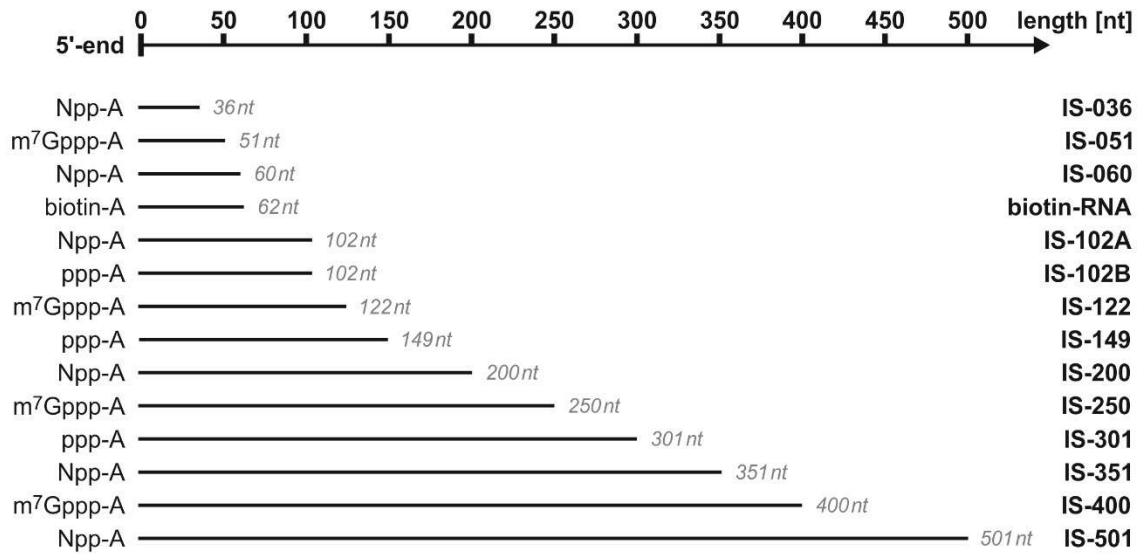

### Preparation:

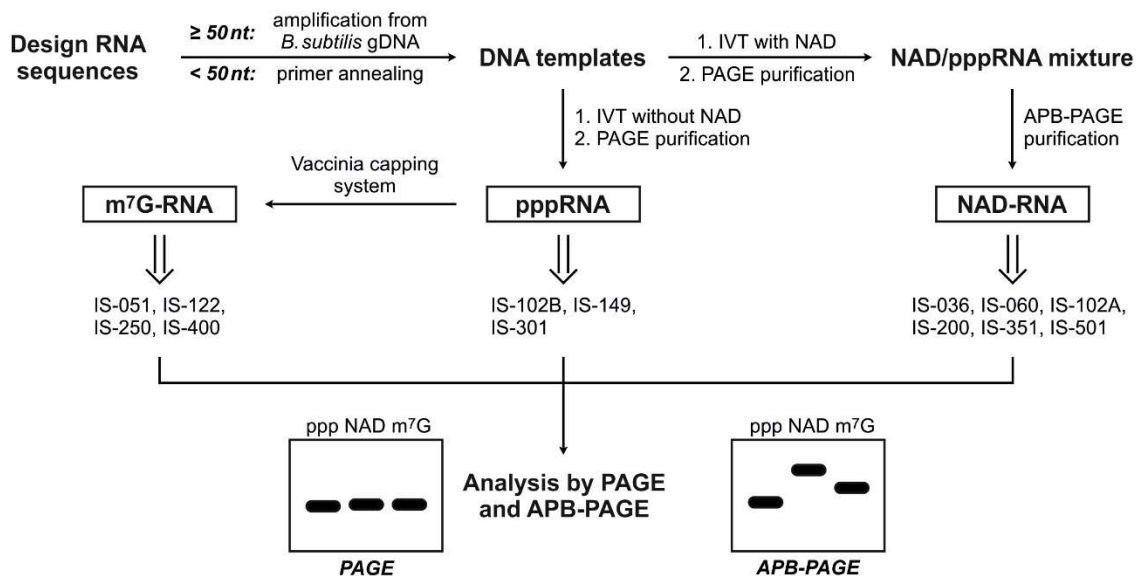

Figure S14: Set of internal RNA standards. The sequences were picked, amplified and *in vitro* transcribed from random regions of the *B. subtilis* genome and named with the identifier IS (internal standard) and the length of the RNA transcript by nucleotide count (e.g. IS-036 has a length of 36 nucleotides). Six of those transcripts were NAD-capped (Npp) and purified by APB-PAGE. Eight transcripts, which comprise of four m<sup>7</sup>G-capped RNAs (m<sup>7</sup>Gppp), three pppRNAs, and one biotin-RNA, serve as controls in the internal standard mix.

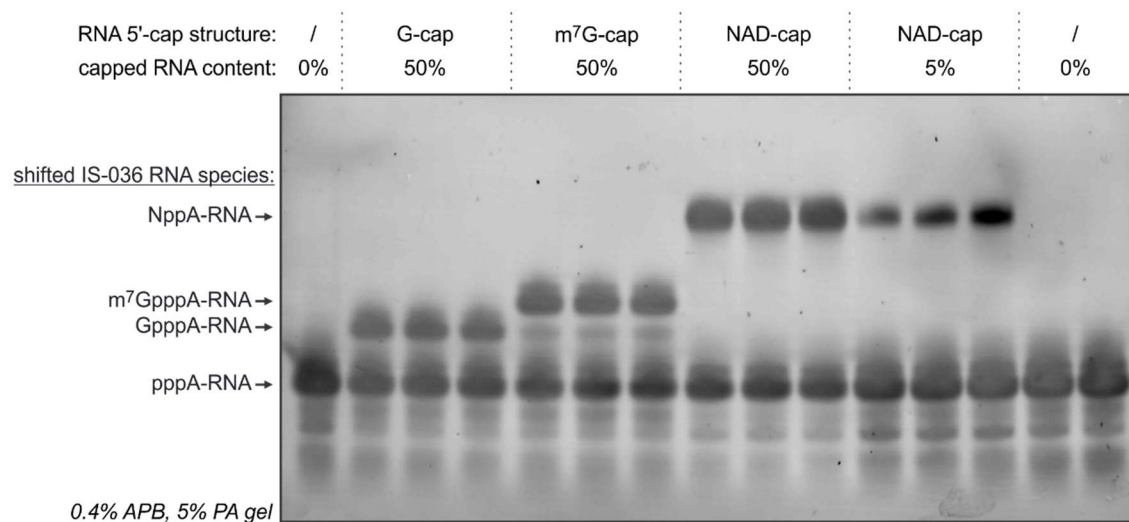

Figure S15: APB-PAGE analysis of IS-036 model RNAs with different 5'-end structures (NAD-cap: NppA, m<sup>7</sup>G-cap: m<sup>7</sup>GpppA, G-cap: GpppA). The various cap structures have different migration properties in the APB gel with the NAD cap structure leading to the slowest migration speed.

**a ADPRC reactivity assay: general scheme for reaction and probing of NAD-capped RNA**

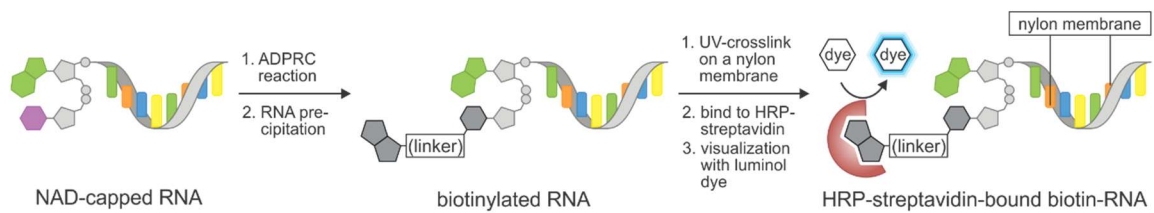

**b ADPRC specificity assay: Dot Blot of ADPRC-3PAB reacted RNA samples (membranes 2–4)**

ADPRC reaction conditions: ~ 4  $\mu$ g IS-036 RNA (45 ng/ $\mu$ L), reaction at 37°C, aliquots removed after certain times

|                        |    |   |     |   |   |   |   |    |    |    |
|------------------------|----|---|-----|---|---|---|---|----|----|----|
| 3PAB substrate (15mM): | –  | + | +   | + | + | + | + | +  | +  | +  |
| ADPRC enzyme (38 nM):  | +  | – | +   | + | + | + | + | +  | +  | +  |
| reaction time [min]:   | 30 | 0 | 0.5 | 1 | 2 | 3 | 5 | 10 | 20 | 30 |

Membrane 2:

RNA mix: 100% pppRNA

50% GpppA-RNA / 50% pppRNA

50% m<sup>7</sup>GpppA-RNA / 50% pppRNA

50% NppA-RNA / 50% pppRNA

5% NppA-RNA / 95% pppRNA

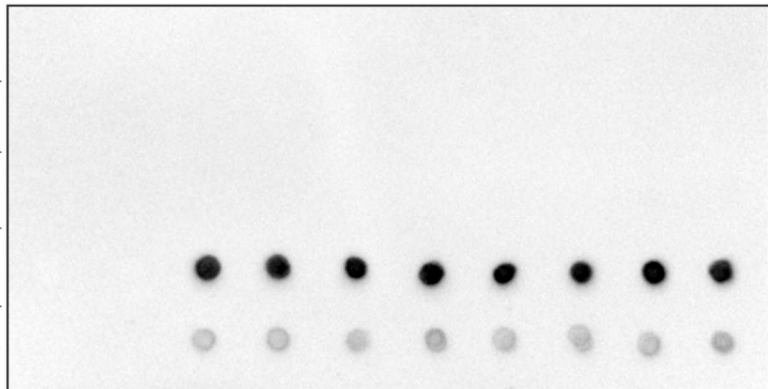

Membrane 3:

RNA mix: 100% pppRNA

50% GpppA-RNA / 50% pppRNA

50% m<sup>7</sup>GpppA-RNA / 50% pppRNA

50% NppA-RNA / 50% pppRNA

5% NppA-RNA / 95% pppRNA

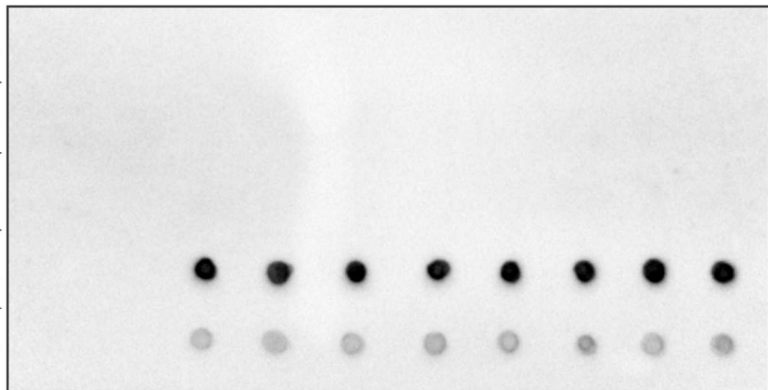

Membrane 4:

RNA mix: 100% pppRNA

50% GpppA-RNA / 50% pppRNA

50% m<sup>7</sup>GpppA-RNA / 50% pppRNA

50% NppA-RNA / 50% pppRNA

5% NppA-RNA / 95% pppRNA

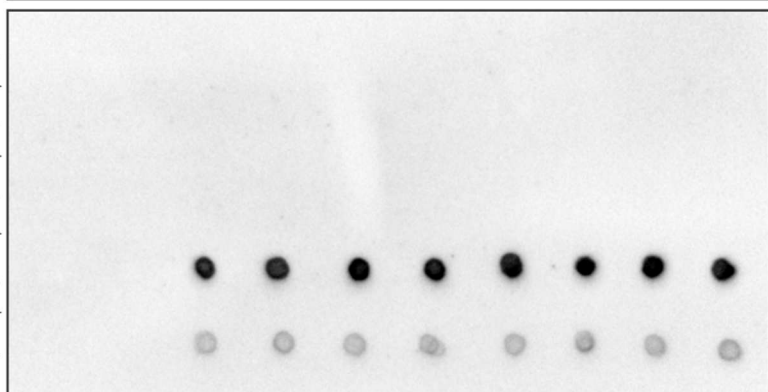

Probing: horseradish peroxidase-streptavidin conjugate and ECL SignalFire reagent

Figure S16: Specificity assay for the ADPRC transglycosylation reaction with 3PAB via dot blot (quadruplicates). a) Concept and workflow of the ADPRC specificity assay. b) 4  $\mu$ g of IS-036 model RNA (45 ng/ $\mu$ L) were reacted in the presence of ADPRC (38 nM) and 3PAB (15

mM) at 37°C, while removing aliquots after certain reaction times, which were quenched and extracted with P/C/I and diethylether. 1 µL of the recovered RNAs (~50 ng/µL) were dotted onto a nylon membrane, UV-crosslinked, incubated with horseradish peroxidase-streptavidin conjugate, and probed with ECL SignalFire reagent before fluorescence readout.



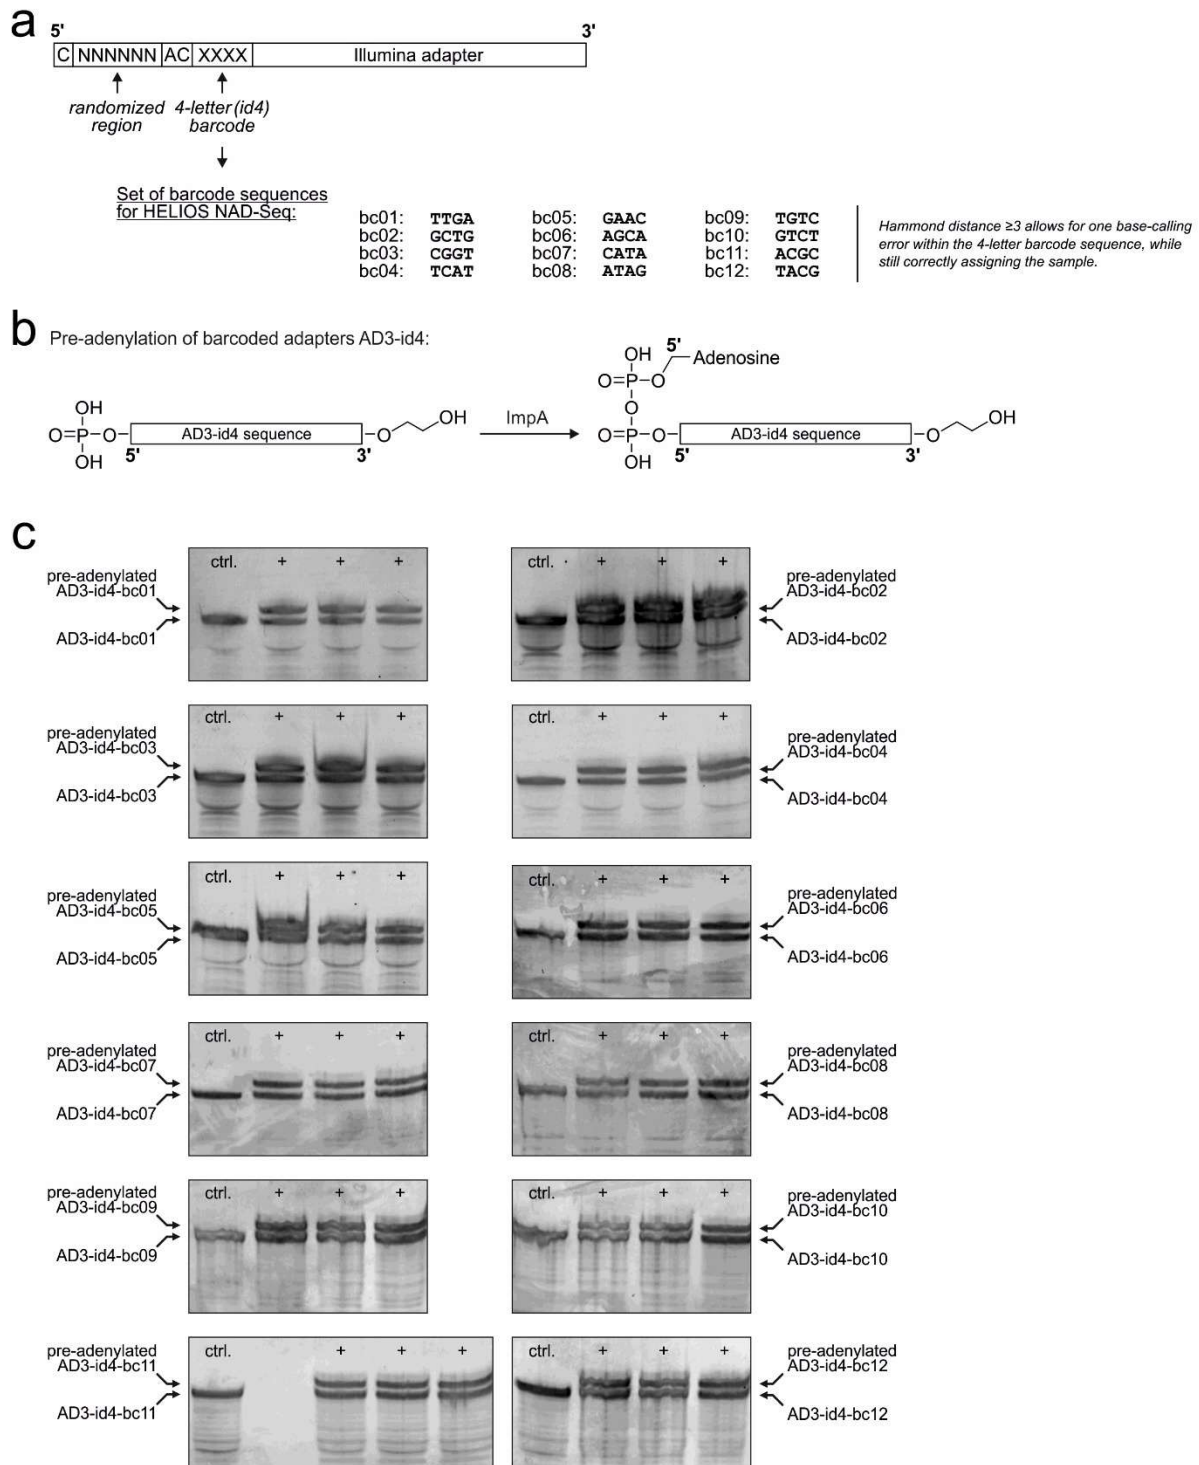

Figure S17: Design of 4-letter barcodes for 3'-ligation adapters (AD3-id4) applied in HELIOS NAD-Seq and pre-adenylation of AD3-id4 adapters. a) General design of AD3-id4 adapters and sequences for barcodes bc01 – bc12. The depicted set of bc01 – bc08 is chosen in HELIOS NAD-Seq for early multiplexing of a complete sample group (four biological replicates and four negative controls). b) Pre-adenylation reaction of adapters AD3-id4. c) Analysis of the pre-adenylation reaction of barcoded adapters AD3-id4 by 20% PAGE (SYBR Gold staining). Adenylation levels of around 50% are readily reached and suffice for application in HELIOS NAD-Seq.

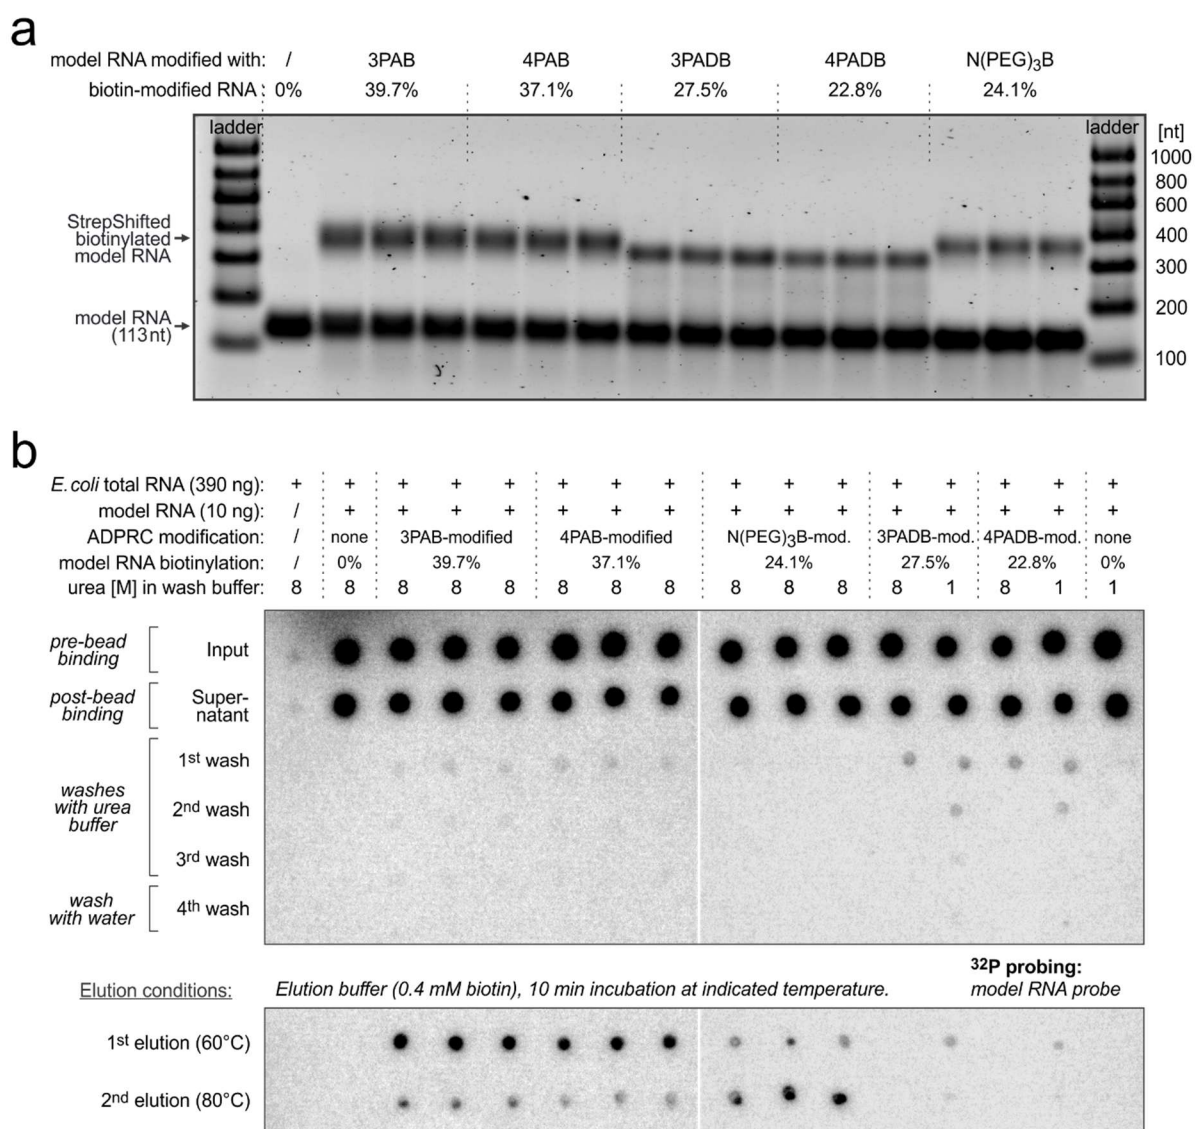

Figure S18: ADPRC transglycosylation reactions of a 113 nt model RNA and evaluation of binding interactions with streptavidin magnetic beads. a) StrepShift assay (triplicates) after shortened ADPRC transglycosylation reactions of model RNA (113 nt) with 3PAB, 4PAB, 3PADB, 4PADB, and N(PEG)<sub>3</sub>B, which led to lower modification ratios in order to monitor specific and unspecific binding of the model RNA on streptavidin magnetic beads. b) Dot blot analysis after streptavidin magnetic bead purification and elution of 3PAB-, 4PAB-, N(PEG)<sub>3</sub>B-, 3PADB-, and 4PADB-modified model RNAs (113 nt) in the presence of *E. coli* total RNA. Supernatant, wash and elution aliquots were blotted, UV-crosslinked and [<sup>32</sup>P]-labeled with a complementary model RNA probe.

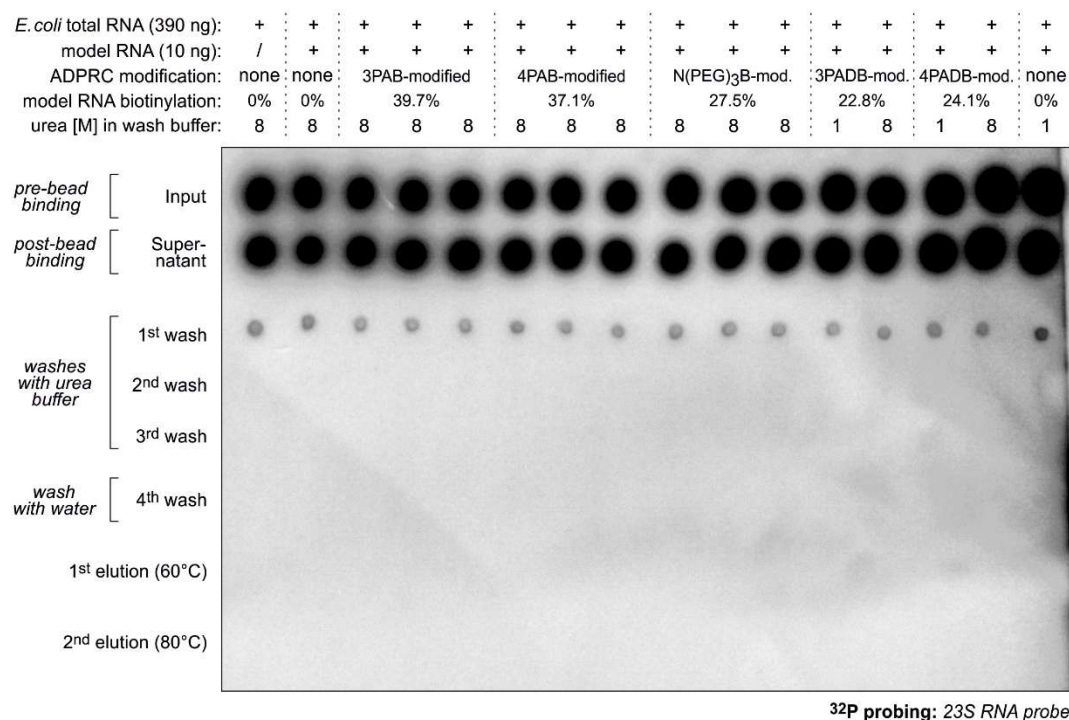

Figure S19: Dot blot analysis after streptavidin magnetic bead purification and elution of different ADPRC-modified model RNAs (113 nt) in the presence of *E. coli* total RNA. Supernatant, wash and elution aliquots were blotted, UV-crosslinked and [<sup>32</sup>P]-labeled with a complementary 23S RNA probe.

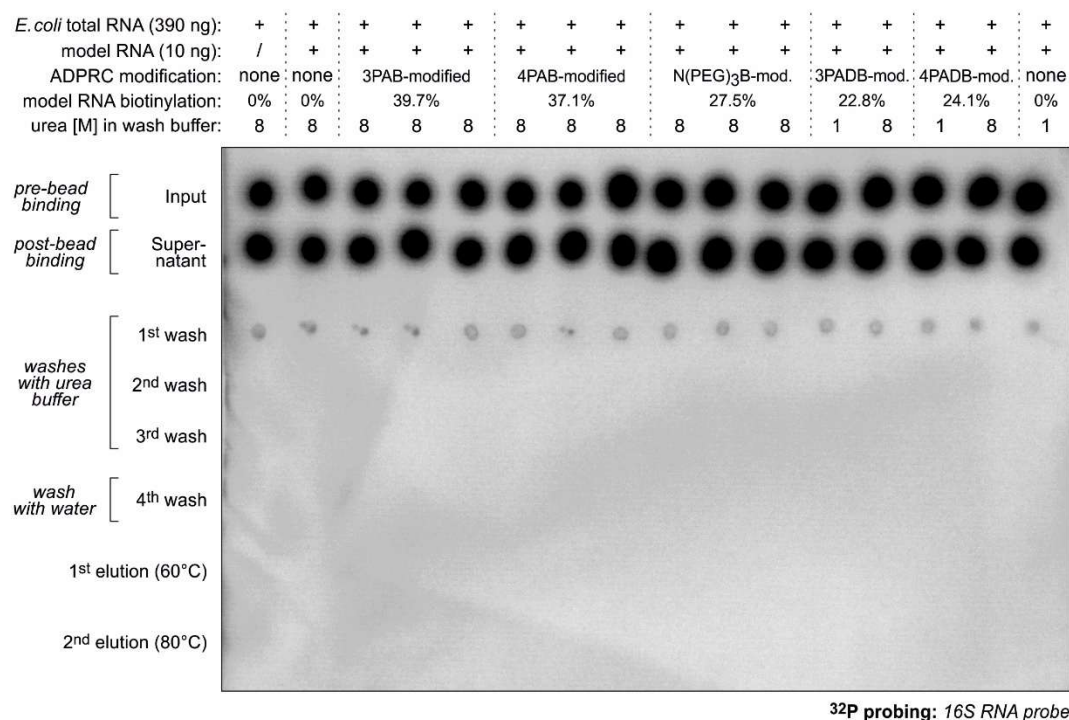

Figure S20: Dot blot analysis after streptavidin magnetic bead purification and elution of different ADPRC-modified model RNAs (113 nt) in the presence of *E. coli* total RNA. Supernatant, wash and elution aliquots were blotted, UV-crosslinked and [<sup>32</sup>P]-labeled with a complementary 16S RNA probe.

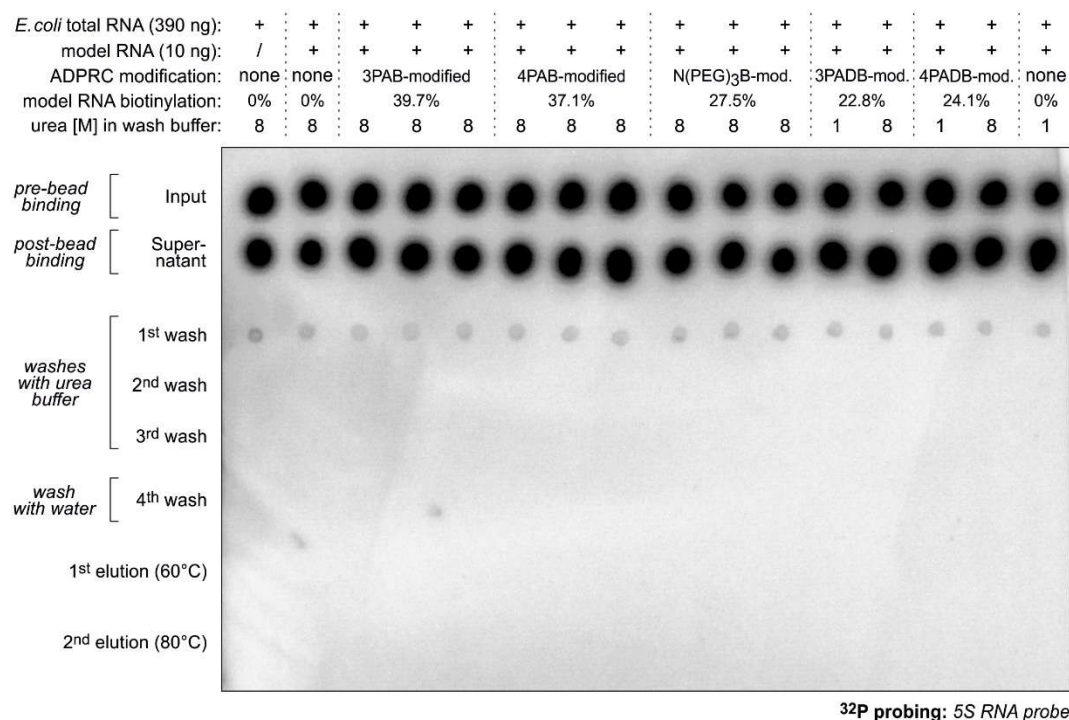

Figure S21: Dot blot analysis after streptavidin magnetic bead purification and elution of different ADPRC-modified model RNAs (113 nt) in the presence of *E. coli* total RNA. Supernatant, wash and elution aliquots were blotted, UV-crosslinked and [<sup>32</sup>P]-labeled with a complementary 16S RNA probe.

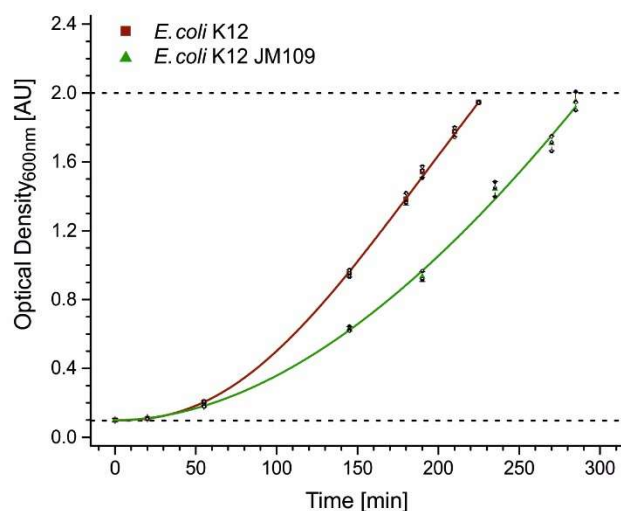

Figure S22: Growth curve of *E. coli* K12 JM109 (biological triplicates) and comparison with *E. coli* K12 strain. Cultures were harvested at the late exponential phase (last data point) at an OD<sub>600</sub> of approximately 2.0. The three datasets per strain were averaged and sigmoidal fits applied for visualization purposes.



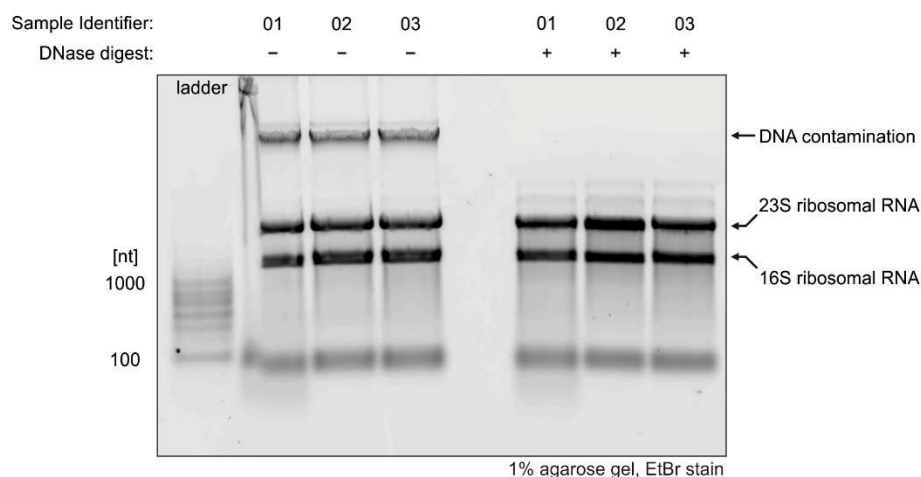

Figure S23: Agarose gel electrophoresis to analyze hot phenol-extracted total RNA samples (biological triplicates) from *E. coli* K12 JM109. After DNase-digest, the DNA contamination was successfully removed.

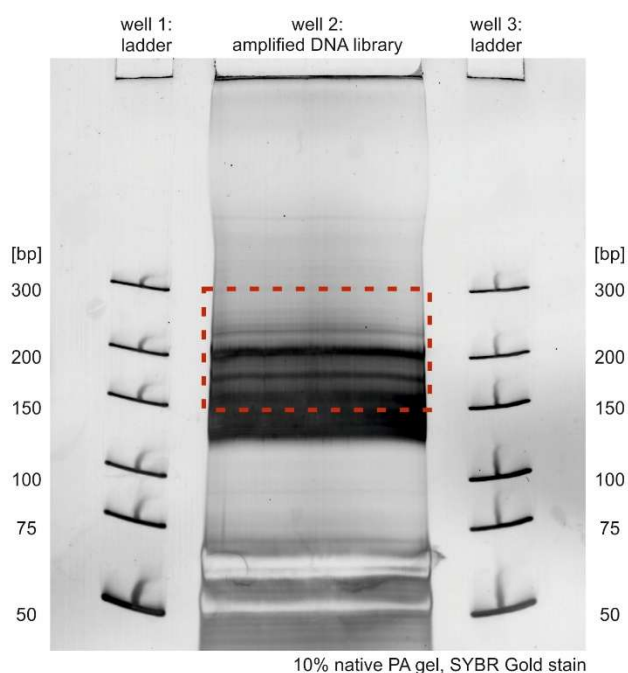

Figure S24: Native PAGE (10%) purification for HELIOS NAD-Seq with *E. coli* K12 JM109 samples. Marked with a red-dashed box is the excision area for size selection (150–300 bp), making sure that the adapter/primer artifact visible at around 140 bp was removed before sequencing. DNA ladder: GeneRuler UltraLow Range DNA Ladder.

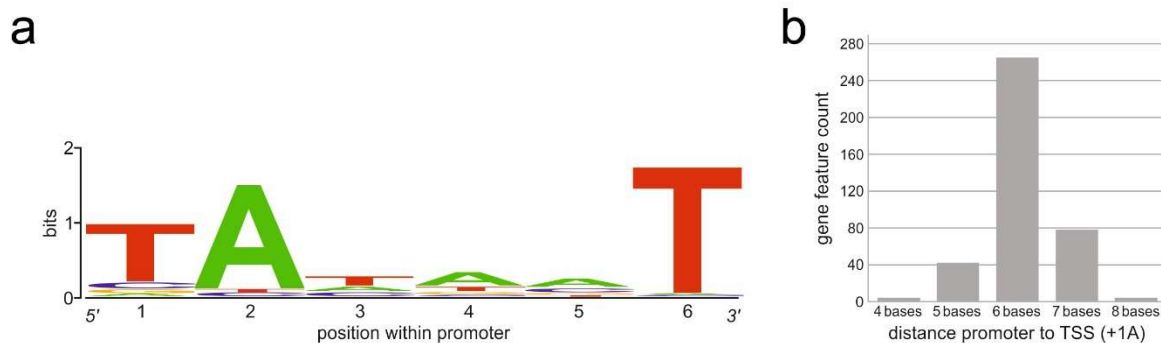

Figure S25: Results of HELIOS NAD-Seq with *E. coli* K12 JM109 samples – promoter for identified NAD-capped transcripts. a) –10 promoter motif for identified NAD-capped transcripts assigned to gene features from *E. coli* K12 JM109 Escherichia coli K-12 substr. MG1655 genome annotation (assembly ASM584v2, RefSeq accession GCF\_000005845.2), and b) distance of the promoter motif to the TSS (+1A).

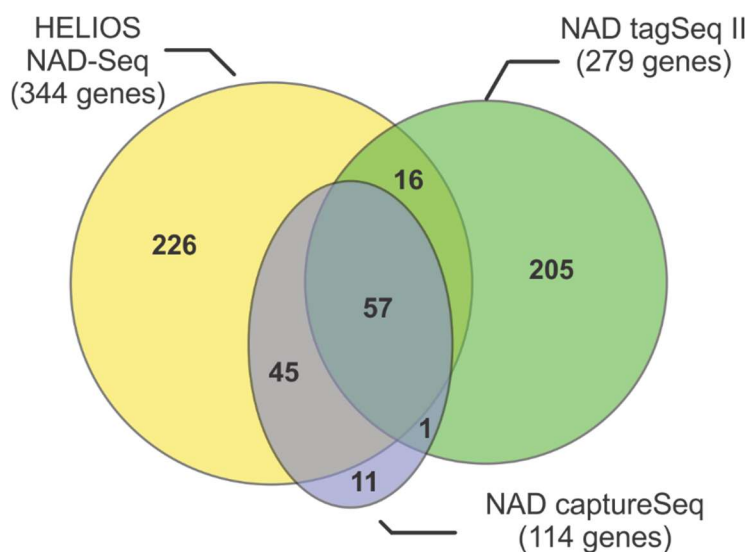

Figure S26. Comparison of overlapping gene features giving rise to NAD-capped RNAs between HELIOS NAD-Seq, NAD captureSeq (all three datasets), NAD tagSeq II

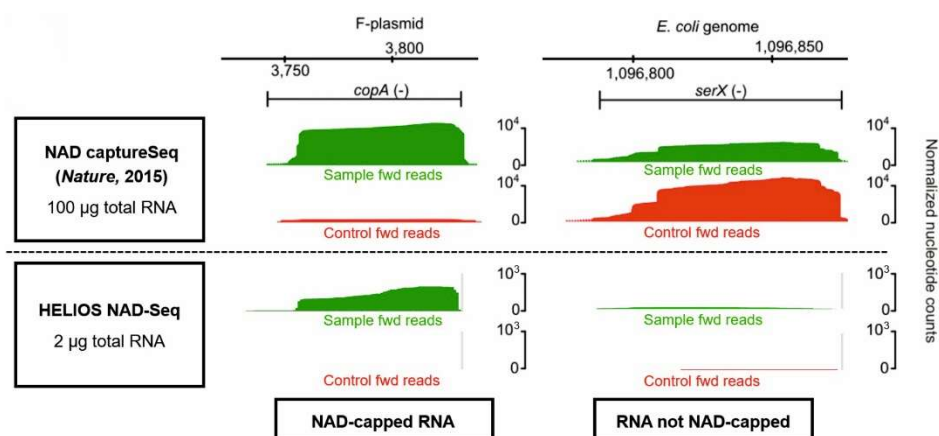

Figure S27: Example for read coverage of an NAD-capped RNA and a non-capped RNA from *E. coli* K12 JM109 and comparison between NAD captureSeq and HELIOS NAD-Seq. High enrichment for the NAD-RNA can be observed for both protocols, while only HELIOS NAD-Seq shows close to 0 reads in the control at roughly 6 million read sequencing depth for the *copA* transcript. Also, the non-capped transcript from the *serX* gene, which showed a major background signal in NAD captureSeq<sup>1</sup>, is clearly identified with low sample and control read counts in HELIOS NAD-Seq.

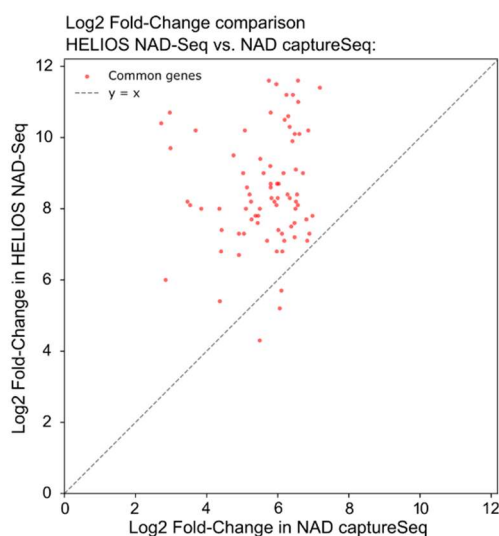

Figure S28: Comparison of log<sub>2</sub> fold-changes between HELIOS NAD-Seq and NAD captureSeq with *E. coli* total RNA isolated at O.D ≈ 2.0. Except for 3 genes, HELIOS NAD-Seq generated higher log<sub>2</sub> fold-changes.

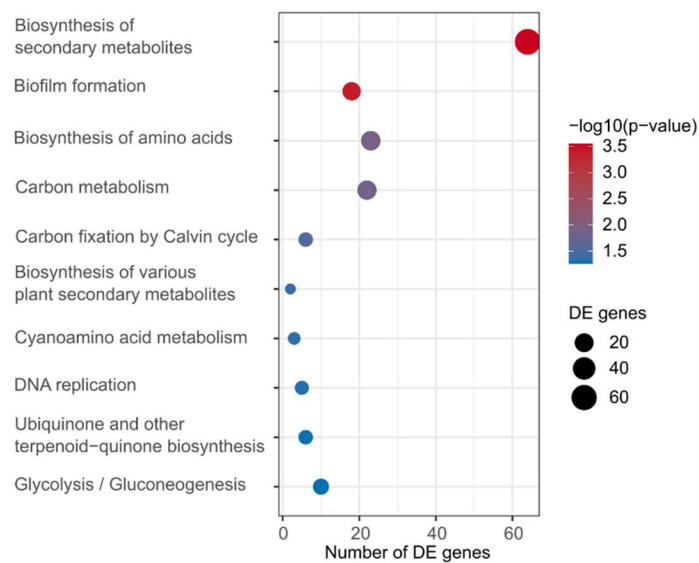

Figure S29: KEGG pathway enrichment analysis of NAD-capped transcripts at timepoint 7 (3 hours and 30 minutes after inoculation). Enriched pathways are shown with number of genes related to each pathway and the corresponding adjusted  $p$ -values.

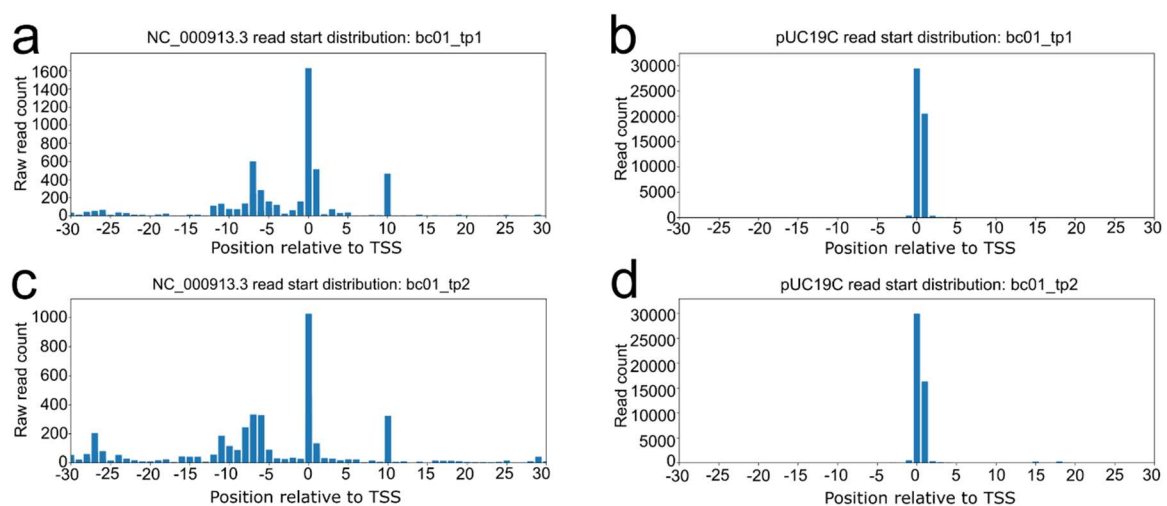

Figure S30: Transcript start site (TSS) mapping of NAD-capped RNAs to the *E. coli* K-12 JM109 genome (NC\_000913.3) and the pUC19 plasmid. 4 representative bar plots from timepoints 1 and 2 for barcode 1 (positive sample) show enrichment at the +1 position (labelled as 0 position relative to TSS) from the -30 to +30 relative TSS position.



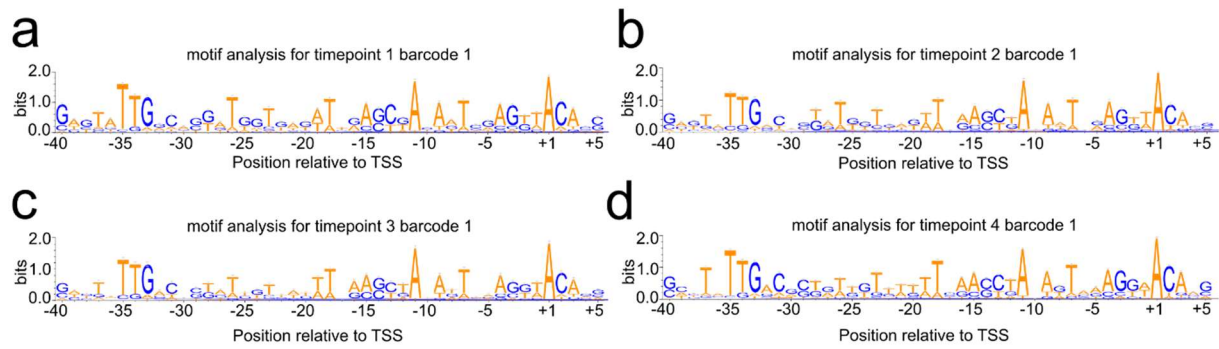

Figure S31: Motif analysis of upstream promoter regions of NAD-capped transcripts. The -10 promoter element (TANNNT) was detected across a majority of timepoints and positive samples that align to the *E. coli* K-12 JM109 genome (NC\_000913.3). Four representative motif analysis plots from time points 1 to 4 for barcode 1 is shown.

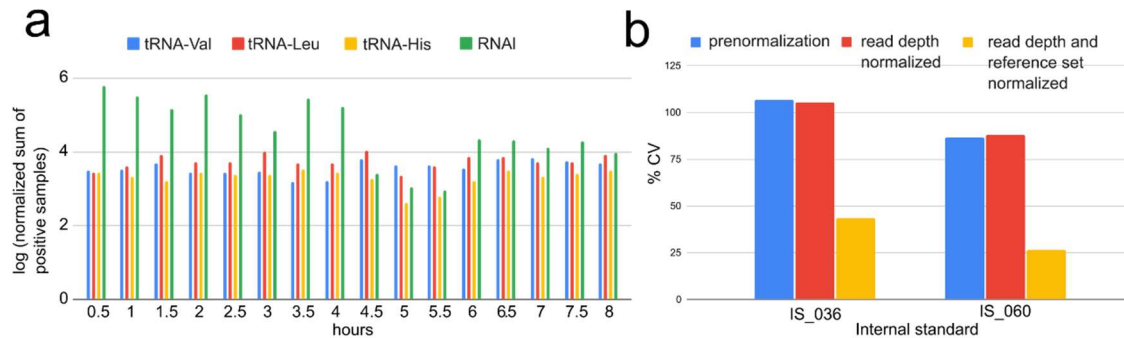

Figure S32: a) Stability of reference genes used for normalization. Expression profiles (normalized sum of all positive samples) of three representative tRNAs (tRNA-Val, tRNA-Leu, tRNA-His) are shown across 16 timepoints, demonstrating stable expression compared to the dynamic profile of RNA1. b) Effect of two-step normalization on internal standard variability. Coefficient of variation (%CV) values for IS036 and IS060 before and after normalization are shown, highlighting significant reduction in %CV after the second step.

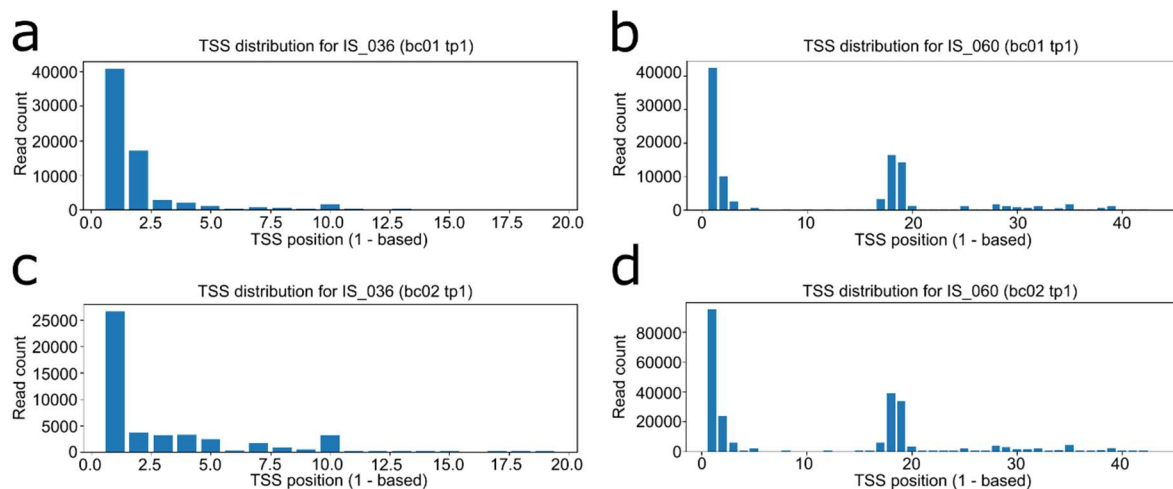

Figure S33: Internal standards IS036 and IS060 show consistent +1 TSS capture across all positive samples and timepoints. Representative TSS plots are shown for the two internal standards for time point 1 barcodes 1 and 2.

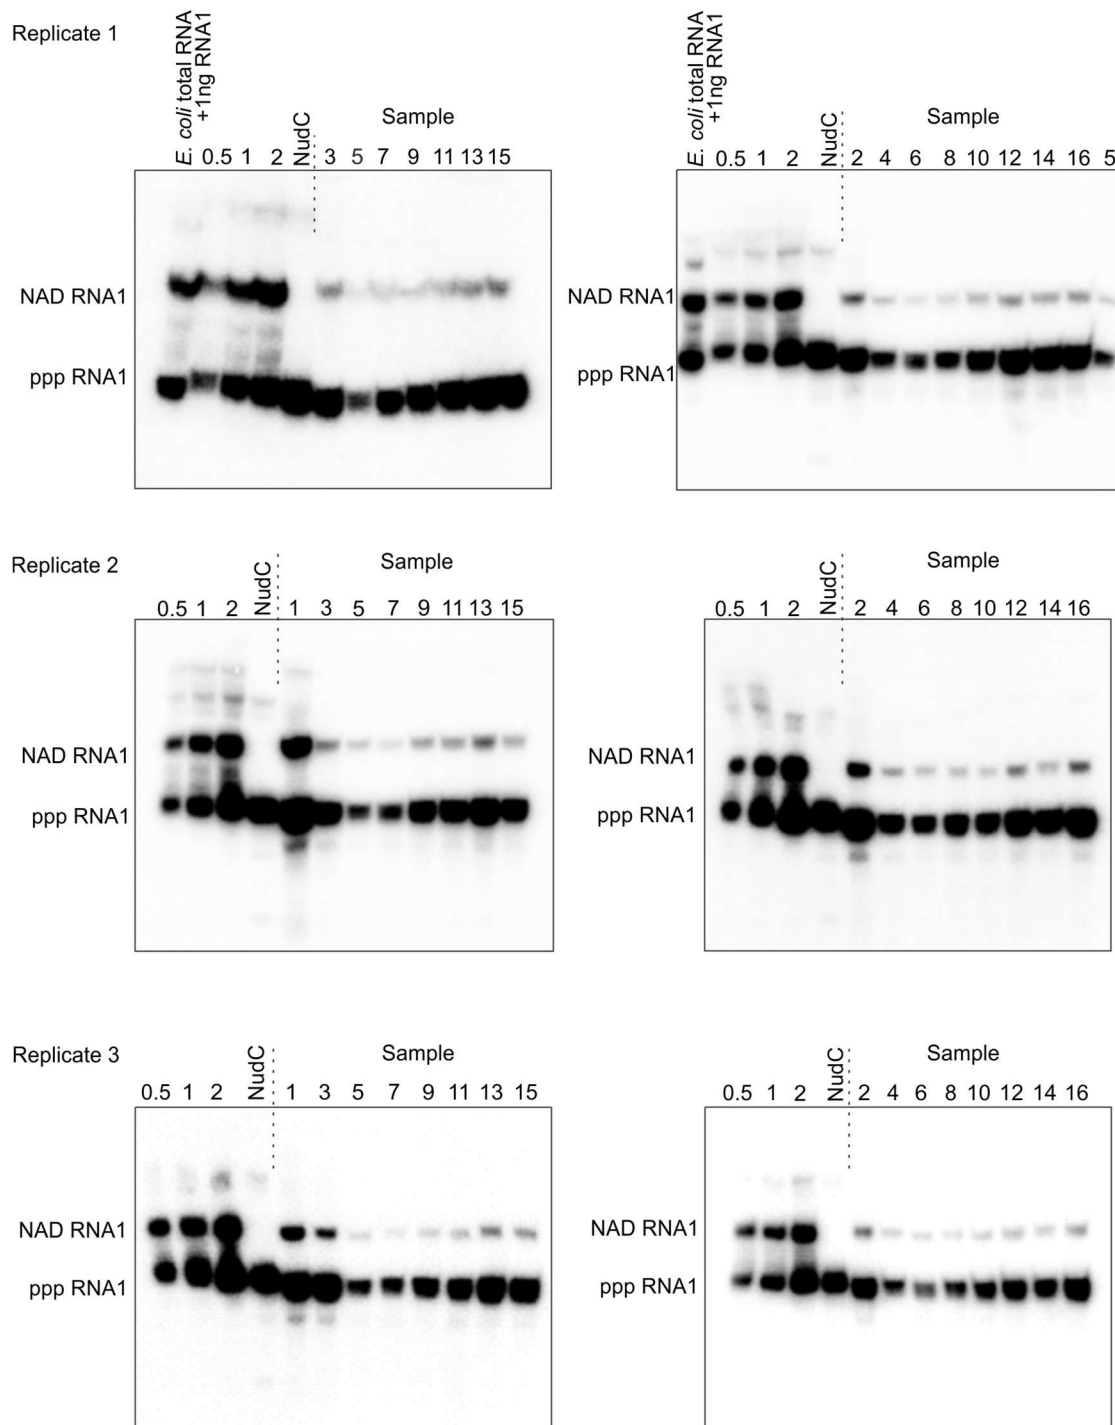

Figure S34: Northern blot detection of RNA1 abundance across 16 timepoints using APB-PAGE and 5'-end  $\gamma$ -[ $^{32}$ P]-ATP-labeled probes. ppp-RNA1 abundance is shown in the lower band and NAD-RNA1 abundance is shown in the upper band. (n=3)

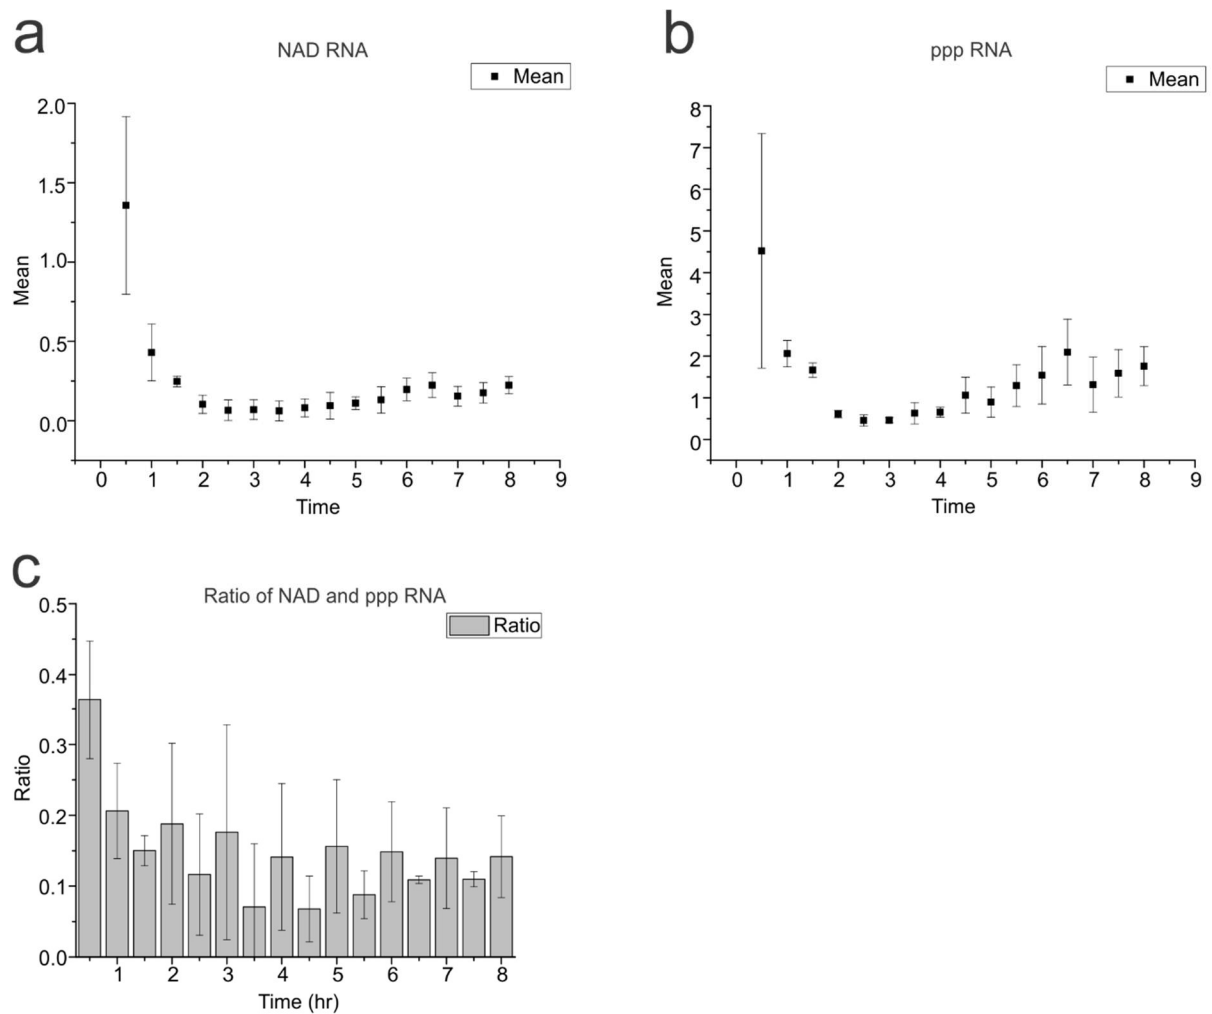

Figure S35: Quantification of changes in a) NAD-RNA1, b) ppp-RNA1 and c) capping ratio changes across the time points. Highest abundance of both non-capped and NAD-capped RNA1, with highest NAD capping ratios were found in time point 1 (30 minutes after inoculation).

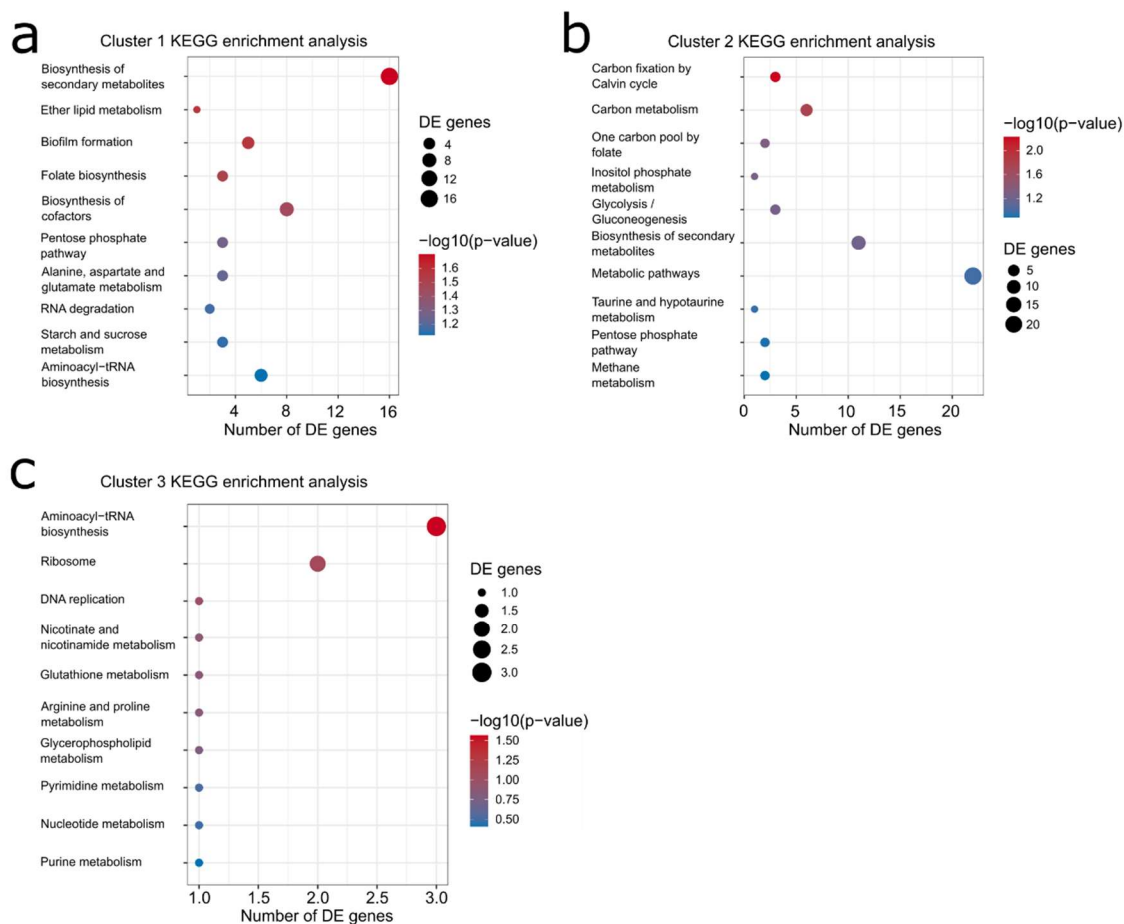

Figure S36: KEGG pathway enrichment analysis for genes in a) cluster 1 and b) cluster 2 of the NAD-capped RNA expression heatmap (Figure 3 e,f). Enriched pathways are shown with number of genes related to each pathway and the corresponding adjusted  $p$ -values.

# Supplementary Tables:

Table S1: Results from the analysis of the sequencing reads aligning to internal RNA standards for the sequencing data set from HELIOS NAD-Seq with *E. coli* K12 JM109 samples. Enrichment factors and log<sub>2</sub>-fold changes were calculated from the 5'-corrected raw read counts (Table S2) after normalization to the internal biotin-RNA standard.

| internal standard | 5'-end structure | RNA length | log <sub>2</sub> -fold change |
|-------------------|------------------|------------|-------------------------------|
| biotin-RNA        | biotin           | 62         | 0                             |
| IS-102B           | ppp              | 102        | 0                             |
| IS-149            | ppp              | 149        | 0                             |
| IS-301            | ppp              | 301        | 0                             |
| IS-051            | m <sup>7</sup> G | 51         | 0                             |
| IS-122            | m <sup>7</sup> G | 122        | 4.9                           |
| IS-250            | m <sup>7</sup> G | 250        | 5.5                           |
| IS-400            | m <sup>7</sup> G | 400        | 0                             |
| IS-036            | NAD              | 36         | 12.0                          |
| IS-060            | NAD              | 60         | 12.5                          |
| IS-102A           | NAD              | 102        | 10.6                          |
| IS-200            | NAD              | 200        | 13.5                          |
| IS-351            | NAD              | 351        | 9.0                           |
| IS-501            | NAD              | 501        | 12.4                          |

Table S2: Raw sequencing read counts with 5'-end correction (5'-adenosine), which align to the internal RNA standards for the sequencing data set from HELIOS NAD-Seq with *E. coli* K12 JM109 samples. Positive samples were tagged with barcodes bc01–bc03, negative controls with barcodes bc04–bc06.

| internal standard     | 5'-end structure      | read counts for each sample/control |          |          |         |         |         |
|-----------------------|-----------------------|-------------------------------------|----------|----------|---------|---------|---------|
|                       |                       | bc01                                | bc02     | bc03     | bc04    | bc05    | bc06    |
| Raw sequencing counts |                       | 35265254                            | 37681136 | 42392083 | 5942629 | 5589215 | 6076486 |
| biotin-RNA            | <i>biotin</i>         | 1309929                             | 937470   | 1054815  | 764752  | 766684  | 806062  |
| IS-102B               | <i>ppp</i>            | 0                                   | 0        | 0        | 0       | 0       | 0       |
| IS-149                | <i>ppp</i>            | 0                                   | 0        | 0        | 0       | 0       | 0       |
| IS-301                | <i>ppp</i>            | 0                                   | 0        | 0        | 0       | 0       | 0       |
| IS-051                | <i>m<sup>7</sup>G</i> | 0                                   | 0        | 0        | 0       | 0       | 0       |
| IS-122                | <i>m<sup>7</sup>G</i> | 76                                  | 0        | 0        | 0       | 0       | 0       |
| IS-250                | <i>m<sup>7</sup>G</i> | 91                                  | 0        | 15       | 0       | 0       | 0       |
| IS-400                | <i>m<sup>7</sup>G</i> | 0                                   | 0        | 0        | 0       | 0       | 0       |
| IS-036                | <i>NAD</i>            | 707257                              | 1528346  | 674869   | 55      | 126     | 380     |
| IS-060                | <i>NAD</i>            | 303981                              | 336582   | 712091   | 11      | 133     | 26      |
| IS-102A               | <i>NAD</i>            | 36853                               | 23308    | 32575    | 26      | 5       | 10      |
| IS-200                | <i>NAD</i>            | 10420                               | 7015     | 7076     | 0       | 0       | 0       |
| IS-351                | <i>NAD</i>            | 552                                 | 259      | 332      | 0       | 0       | 0       |
| IS-501                | <i>NAD</i>            | 6129                                | 1875     | 4148     | 0       | 0       | 0       |

Table S3: Results from the bioinformatic analysis of the sequencing data set from HELIOS NAD-Seq with *E. coli* K12 JM109 samples and the gene features the identified RNA transcripts align to. A very high probability of NAD-capping was assigned to those transcripts, as they fulfill a challenging set of restrictions (baseMean  $\geq 50$ , Log2-fold change  $\geq 3$ , adjusted p-value  $\leq 0.01$ ). The transcripts marked with an asterisk (\*) are RNA species that were also identified in at least one of the NAD captureSeq data sets<sup>1</sup>.

| RNA transcript | Category       | BaseMean | log <sub>2</sub> -fold change | adjusted p-value |
|----------------|----------------|----------|-------------------------------|------------------|
| RNAI *         | sRNA           | 173637   | 7.6                           | 1.1E-19          |
| QUAD, sibD *   | sRNA           | 22656    | 10.6                          | 2.7E-12          |
| QUAD, sibE *   | sRNA           | 11910    | 9.1                           | 4.2E-16          |
| sfsA *         | protein-coding | 9967     | 10.5                          | 6.8E-13          |
| sroB (chiX) *  | sRNA           | 7329     | 9.0                           | 2.8E-11          |
| GadY *         | sRNA           | 6017     | 11.4                          | 5.7E-19          |
| raiA *         | protein-coding | 4451     | 7.4                           | 1.2E-09          |
| QUAD, sibC *   | sRNA           | 3889     | 11.6                          | 1.1E-11          |
| yfjI           | protein-coding | 2299     | 9.1                           | 1.7E-16          |
| ykgS           | pseudogene     | 2294     | 9.9                           | 3.2E-15          |
| SraC_RyeA *    | sRNA           | 2225     | 6.8                           | 2.7E-04          |
| rlmI *         | protein-coding | 1999     | 11.6                          | 1.6E-06          |
| bsmA *         | protein-coding | 1961     | 11.5                          | 4.0E-05          |
| GcvB *         | sRNA           | 1571     | 11.2                          | 5.7E-07          |
| yaiO *         | protein-coding | 1558     | 11.2                          | 1.4E-06          |
| gatY *         | protein-coding | 1351     | 9.2                           | 4.9E-14          |
| hdeD *         | protein-coding | 1323     | 11.0                          | 1.3E-06          |
| glgX *         | protein-coding | 1102     | 10.7                          | 4.1E-06          |
| ompP *         | protein-coding | 1098     | 10.7                          | 2.0E-06          |
| epd *          | protein-coding | 947      | 9.5                           | 7.9E-09          |
| ymdB           | protein-coding | 887      | 10.4                          | 3.5E-06          |
| traG *         | protein-coding | 877      | 10.4                          | 3.9E-06          |
| csdA *         | protein-coding | 859      | 10.3                          | 7.7E-06          |
| bfr            | protein-coding | 837      | 10.3                          | 5.7E-06          |
| aspA *         | protein-coding | 787      | 10.2                          | 2.2E-05          |
| yuaQ           | protein-coding | 786      | 10.2                          | 6.3E-06          |
| ykgN *         | pseudogene     | 770      | 10.2                          | 7.5E-06          |
| nuoG           | protein-coding | 770      | 5.6                           | 9.6E-03          |
| erfK           | protein-coding | 762      | 10.2                          | 7.2E-06          |
| tqsA *         | protein-coding | 754      | 10.2                          | 1.2E-05          |
| cdsA *         | protein-coding | 736      | 10.1                          | 5.3E-06          |
| yiaT           | protein-coding | 735      | 10.1                          | 2.4E-05          |
| efp            | protein-coding | 732      | 9.2                           | 2.6E-07          |
| repA2          | protein-coding | 709      | 10.1                          | 1.2E-05          |
| ydfJ *         | pseudogene     | 701      | 8.2                           | 5.0E-09          |
| racR *         | protein-coding | 699      | 10.1                          | 6.3E-06          |
| talA           | protein-coding | 665      | 6.6                           | 1.1E-06          |
| ydjN *         | protein-coding | 639      | 7.4                           | 5.3E-10          |

|          |                |     |     |         |
|----------|----------------|-----|-----|---------|
| mnmA     | protein-coding | 623 | 9.9 | 7.7E-06 |
| lrhA *   | protein-coding | 616 | 9.9 | 8.9E-05 |
| yhcF     | protein-coding | 585 | 9.8 | 2.2E-05 |
| ybaJ     | protein-coding | 574 | 9.8 | 2.4E-05 |
| ribA     | protein-coding | 569 | 9.8 | 1.2E-05 |
| traY *   | protein-coding | 549 | 9.7 | 1.1E-05 |
| gltF     | protein-coding | 512 | 9.6 | 1.5E-05 |
| nadR     | protein-coding | 466 | 9.5 | 5.2E-05 |
| betT     | protein-coding | 453 | 9.4 | 1.0E-04 |
| CopA *   | sRNA           | 432 | 9.4 | 6.2E-05 |
| yhbT     | protein-coding | 430 | 9.4 | 3.5E-05 |
| poxA *   | protein-coding | 418 | 8.4 | 6.7E-07 |
| ygcB     | protein-coding | 416 | 9.3 | 2.4E-05 |
| ybgC     | protein-coding | 415 | 8.3 | 1.5E-06 |
| rplT     | protein-coding | 395 | 9.2 | 3.6E-05 |
| ycfH     | protein-coding | 394 | 8.3 | 1.7E-06 |
| ycbJ *   | protein-coding | 383 | 8.2 | 2.5E-06 |
| yahN     | protein-coding | 376 | 8.2 | 5.3E-07 |
| osmB     | protein-coding | 372 | 9.1 | 8.3E-05 |
| pqqL     | protein-coding | 366 | 8.2 | 1.5E-06 |
| yifK     | protein-coding | 362 | 9.1 | 1.7E-04 |
| kdsD *   | protein-coding | 361 | 7.3 | 5.0E-09 |
| fimH     | protein-coding | 351 | 9.1 | 2.5E-04 |
| aroG     | protein-coding | 346 | 7.0 | 7.7E-06 |
| CsrC *   | sRNA           | 339 | 8.1 | 2.3E-06 |
| thrS *   | protein-coding | 336 | 9.0 | 1.7E-04 |
| pyrG *   | protein-coding | 335 | 8.0 | 1.2E-06 |
| allR     | protein-coding | 335 | 9.0 | 1.2E-04 |
| yniB *   | protein-coding | 331 | 9.0 | 2.1E-04 |
| ygdH *   | protein-coding | 329 | 9.0 | 5.7E-05 |
| ubiC     | protein-coding | 322 | 8.9 | 1.8E-04 |
| trmA     | protein-coding | 322 | 8.9 | 1.5E-04 |
| glgS     | protein-coding | 315 | 8.9 | 5.6E-05 |
| hycH     | protein-coding | 314 | 8.9 | 2.1E-04 |
| yfeX     | protein-coding | 313 | 8.9 | 1.7E-04 |
| tRNA-Met | tRNA           | 308 | 7.9 | 8.9E-05 |
| yhjS     | protein-coding | 300 | 8.8 | 1.5E-04 |
| lptC     | protein-coding | 296 | 8.8 | 2.7E-04 |
| yoeG     | pseudogene     | 292 | 8.8 | 2.1E-04 |
| yagJ     | pseudogene     | 281 | 8.7 | 1.5E-04 |
| sfmD     | protein-coding | 278 | 8.7 | 1.5E-04 |
| yghB *   | protein-coding | 276 | 8.7 | 1.5E-04 |
| zapA *   | protein-coding | 274 | 8.7 | 2.4E-04 |
| thrA *   | protein-coding | 269 | 8.7 | 2.0E-04 |
| rfaY     | protein-coding | 268 | 8.7 | 7.7E-04 |
| yrfF     | protein-coding | 264 | 8.6 | 1.5E-04 |



|           |                |     |     |         |
|-----------|----------------|-----|-----|---------|
| ytfB *    | protein-coding | 262 | 8.6 | 2.3E-04 |
| yuaO      | protein-coding | 261 | 8.6 | 4.5E-04 |
| tRNA-Glu  | tRNA           | 254 | 3.5 | 6.9E-03 |
| cbpA *    | protein-coding | 253 | 8.6 | 1.5E-04 |
| uraA      | protein-coding | 249 | 8.6 | 6.4E-04 |
| GlmZ_SraJ | sRNA           | 249 | 5.8 | 1.0E-03 |
| rob *     | protein-coding | 237 | 6.7 | 3.6E-08 |
| fieF      | protein-coding | 236 | 7.5 | 2.4E-05 |
| bla *     | protein-coding | 231 | 5.2 | 6.6E-04 |
| yfcO *    | protein-coding | 229 | 8.4 | 1.6E-04 |
| trpH      | protein-coding | 227 | 8.4 | 2.2E-04 |
| DsrA *    | sRNA           | 223 | 8.4 | 1.6E-04 |
| tRNA-Gly  | tRNA           | 219 | 8.4 | 2.0E-04 |
| slp       | protein-coding | 218 | 7.4 | 7.7E-06 |
| fucP      | protein-coding | 210 | 3.7 | 3.7E-06 |
| melR *    | protein-coding | 210 | 8.3 | 8.6E-04 |
| exuR *    | protein-coding | 209 | 8.3 | 3.3E-04 |
| yefM      | protein-coding | 206 | 8.3 | 2.4E-04 |
| osmE *    | protein-coding | 206 | 8.3 | 1.8E-03 |
| matA      | protein-coding | 205 | 8.3 | 2.3E-04 |
| ymgD      | protein-coding | 204 | 8.3 | 2.7E-04 |
| ydbA      | pseudogene     | 202 | 7.3 | 6.9E-06 |
| ycdT      | protein-coding | 200 | 8.2 | 5.4E-04 |
| fxsA *    | protein-coding | 199 | 8.2 | 5.7E-04 |
| yhhA *    | protein-coding | 196 | 7.2 | 2.2E-05 |
| dicA *    | protein-coding | 196 | 8.2 | 4.4E-04 |
| yfhB      | protein-coding | 195 | 8.2 | 5.8E-04 |
| ypfM      | protein-coding | 193 | 8.2 | 4.5E-04 |
| yjiT      | pseudogene     | 192 | 8.2 | 3.2E-04 |
| rplN      | protein-coding | 191 | 8.2 | 3.0E-04 |
| tnaB      | protein-coding | 187 | 7.2 | 3.5E-05 |
| yebW *    | protein-coding | 186 | 8.1 | 3.8E-04 |
| mqsR      | protein-coding | 186 | 8.1 | 4.5E-04 |
| mdaB      | protein-coding | 185 | 8.1 | 5.3E-04 |
| dnaA      | protein-coding | 183 | 8.1 | 1.4E-03 |
| dnaG      | protein-coding | 183 | 8.1 | 6.0E-04 |
| kdsC      | protein-coding | 182 | 8.1 | 5.8E-04 |
| glpA *    | protein-coding | 181 | 8.1 | 5.4E-04 |
| flgG      | protein-coding | 178 | 8.1 | 3.3E-04 |
| mgsA *    | protein-coding | 178 | 7.1 | 5.3E-05 |
| amyA      | protein-coding | 176 | 8.1 | 5.2E-04 |
| ypfJ *    | protein-coding | 174 | 8.0 | 9.5E-04 |
| dcrB *    | protein-coding | 173 | 8.0 | 6.7E-04 |
| ucpA *    | protein-coding | 173 | 8.0 | 5.4E-04 |
| btuB      | protein-coding | 172 | 8.0 | 4.7E-04 |
| insH4     | protein-coding | 172 | 8.0 | 5.3E-04 |

|        |                |     |     |         |
|--------|----------------|-----|-----|---------|
| insH9  | protein-coding | 171 | 8.0 | 5.4E-04 |
| setA   | protein-coding | 171 | 8.0 | 7.9E-04 |
| yqgA   | protein-coding | 168 | 8.0 | 6.0E-04 |
| emrK   | protein-coding | 165 | 8.0 | 5.5E-04 |
| ascF   | protein-coding | 165 | 7.0 | 2.5E-05 |
| ybaO * | protein-coding | 164 | 8.0 | 5.5E-04 |
| hdeA   | protein-coding | 162 | 7.9 | 2.7E-03 |
| spy    | protein-coding | 160 | 7.9 | 1.1E-03 |
| cysP   | protein-coding | 159 | 7.9 | 5.4E-04 |
| yibA   | protein-coding | 157 | 7.9 | 6.1E-04 |
| fabR   | protein-coding | 155 | 7.9 | 4.3E-04 |
| yqeJ   | protein-coding | 153 | 4.0 | 7.1E-04 |
| pifA   | protein-coding | 152 | 6.9 | 4.2E-05 |
| mgrB * | protein-coding | 150 | 7.8 | 9.5E-04 |
| miaA   | protein-coding | 150 | 7.8 | 7.8E-04 |
| insK * | protein-coding | 150 | 7.8 | 7.5E-04 |
| FinP   | sRNA           | 150 | 7.8 | 2.4E-03 |
| yeal   | protein-coding | 149 | 7.8 | 5.2E-04 |
| yfiR   | protein-coding | 149 | 7.8 | 1.4E-03 |
| yjgD   | protein-coding | 149 | 6.8 | 4.2E-05 |
| ykgH   | protein-coding | 147 | 7.8 | 9.2E-04 |
| cutC   | protein-coding | 145 | 7.8 | 4.7E-04 |
| yihI   | protein-coding | 143 | 7.8 | 9.2E-04 |
| trmJ * | protein-coding | 143 | 7.8 | 6.4E-04 |
| setC   | protein-coding | 141 | 7.7 | 1.5E-03 |
| cysB   | protein-coding | 139 | 7.7 | 2.2E-03 |
| nagA * | protein-coding | 139 | 7.7 | 1.5E-03 |
| rlmE * | protein-coding | 139 | 7.7 | 1.9E-03 |
| yhdJ   | protein-coding | 139 | 7.7 | 8.1E-04 |
| rraA   | protein-coding | 139 | 7.7 | 1.0E-03 |
| tusB   | protein-coding | 138 | 7.7 | 2.0E-03 |
| atoS   | protein-coding | 136 | 6.7 | 5.6E-05 |
| cytR   | protein-coding | 136 | 7.7 | 6.7E-04 |
| ygdR   | protein-coding | 136 | 7.7 | 3.4E-03 |
| sfa    | protein-coding | 136 | 7.7 | 8.5E-04 |
| tynA   | protein-coding | 135 | 7.7 | 1.9E-03 |
| yhbX   | protein-coding | 135 | 7.7 | 5.7E-04 |
| yfdY   | protein-coding | 134 | 7.7 | 8.1E-04 |
| dapA * | protein-coding | 132 | 7.6 | 8.9E-04 |
| puuP   | protein-coding | 131 | 7.6 | 2.4E-03 |
| hemD   | protein-coding | 127 | 7.6 | 8.1E-04 |
| ydcJ   | protein-coding | 127 | 5.5 | 1.2E-03 |
| yncN   | protein-coding | 125 | 7.6 | 2.2E-03 |
| glcB   | protein-coding | 124 | 7.6 | 9.8E-04 |
| ccdA   | protein-coding | 124 | 7.6 | 2.2E-03 |
| holC   | protein-coding | 124 | 7.6 | 2.0E-03 |

|           |                |     |     |         |
|-----------|----------------|-----|-----|---------|
| ylaB      | protein-coding | 124 | 7.6 | 1.4E-03 |
| yfhK      | protein-coding | 123 | 7.5 | 1.1E-03 |
| yfiL      | protein-coding | 122 | 6.5 | 1.7E-04 |
| rppH *    | protein-coding | 122 | 7.5 | 1.9E-03 |
| tral      | protein-coding | 121 | 7.5 | 1.5E-03 |
| rnc       | protein-coding | 121 | 5.7 | 1.0E-04 |
| mdtE      | protein-coding | 117 | 7.5 | 1.0E-03 |
| rihA      | protein-coding | 115 | 7.4 | 3.9E-03 |
| betA      | protein-coding | 114 | 7.4 | 2.2E-03 |
| alaS      | protein-coding | 114 | 7.4 | 1.1E-03 |
| rffG      | protein-coding | 113 | 7.4 | 1.1E-03 |
| udk       | protein-coding | 113 | 7.4 | 3.8E-03 |
| yejF      | protein-coding | 112 | 7.4 | 8.3E-04 |
| yabP      | pseudogene     | 112 | 7.4 | 8.8E-04 |
| gmhB      | protein-coding | 112 | 7.4 | 9.3E-04 |
| holE      | protein-coding | 110 | 7.4 | 1.8E-03 |
| yuaU      | protein-coding | 110 | 7.4 | 1.5E-03 |
| rfbX      | protein-coding | 109 | 7.4 | 1.8E-03 |
| cmk       | protein-coding | 108 | 7.4 | 1.9E-03 |
| otsA      | protein-coding | 108 | 7.4 | 2.5E-03 |
| skp       | protein-coding | 108 | 7.4 | 1.2E-03 |
| ylbH      | pseudogene     | 108 | 7.4 | 1.3E-03 |
| pflB      | protein-coding | 107 | 7.3 | 1.7E-03 |
| tRNA-Ser  | tRNA           | 107 | 7.3 | 1.1E-03 |
| yhiJ      | protein-coding | 106 | 4.0 | 1.4E-03 |
| yciC      | protein-coding | 106 | 7.3 | 2.6E-03 |
| nirB      | protein-coding | 105 | 7.3 | 1.7E-03 |
| ubiD      | protein-coding | 105 | 7.3 | 1.0E-03 |
| ytfN      | protein-coding | 103 | 7.3 | 1.1E-03 |
| yaiS      | protein-coding | 103 | 7.3 | 2.9E-03 |
| melB      | protein-coding | 103 | 7.3 | 3.5E-03 |
| yfcB *    | protein-coding | 103 | 7.3 | 1.3E-03 |
| csrA *    | protein-coding | 103 | 7.3 | 6.2E-03 |
| cycA *    | protein-coding | 102 | 7.3 | 5.1E-03 |
| ybdM      | protein-coding | 99  | 7.2 | 9.6E-03 |
| ydfG      | protein-coding | 99  | 4.8 | 4.0E-05 |
| SraB_PsrD | sRNA           | 99  | 7.2 | 1.1E-03 |
| yfjN      | protein-coding | 99  | 7.2 | 1.5E-03 |
| yqeA      | protein-coding | 99  | 7.2 | 5.8E-03 |
| ybhQ      | protein-coding | 97  | 7.2 | 2.5E-03 |
| lptF      | protein-coding | 97  | 7.2 | 2.0E-03 |
| dusC      | protein-coding | 96  | 6.2 | 3.4E-03 |
| kdsA      | protein-coding | 96  | 7.2 | 2.3E-03 |
| yidE      | protein-coding | 96  | 7.2 | 2.3E-03 |
| ppiA      | protein-coding | 94  | 6.2 | 1.8E-03 |
| gcvR      | protein-coding | 94  | 7.2 | 1.7E-03 |

|          |                |    |     |         |
|----------|----------------|----|-----|---------|
| yiaJ     | protein-coding | 93 | 7.1 | 1.4E-03 |
| yqiB *   | protein-coding | 93 | 7.1 | 2.7E-03 |
| iraP     | protein-coding | 93 | 7.1 | 2.5E-03 |
| ybdR     | protein-coding | 91 | 7.1 | 1.9E-03 |
| yecH     | protein-coding | 91 | 7.1 | 1.3E-03 |
| ais      | protein-coding | 91 | 7.1 | 8.0E-03 |
| hisL *   | protein-coding | 90 | 7.1 | 1.4E-03 |
| modE     | protein-coding | 89 | 7.1 | 2.2E-03 |
| yjbQ     | protein-coding | 88 | 7.1 | 2.1E-03 |
| yicO     | protein-coding | 88 | 7.1 | 1.7E-03 |
| dcuC     | protein-coding | 88 | 7.1 | 2.0E-03 |
| yjeH     | protein-coding | 87 | 7.0 | 8.0E-03 |
| ycgX     | protein-coding | 86 | 7.0 | 5.2E-03 |
| ycbB     | protein-coding | 86 | 7.0 | 2.0E-03 |
| htrE     | protein-coding | 86 | 7.0 | 1.8E-03 |
| mviN     | protein-coding | 85 | 7.0 | 2.0E-03 |
| hupB     | protein-coding | 84 | 7.0 | 5.8E-03 |
| metG     | protein-coding | 84 | 7.0 | 1.9E-03 |
| yebG     | protein-coding | 84 | 7.0 | 2.9E-03 |
| asnA     | protein-coding | 83 | 7.0 | 1.9E-03 |
| metK     | protein-coding | 83 | 7.0 | 5.4E-03 |
| sodB *   | protein-coding | 82 | 6.0 | 4.9E-04 |
| yedK     | protein-coding | 82 | 7.0 | 6.3E-03 |
| yifL     | protein-coding | 82 | 7.0 | 4.2E-03 |
| ymdF     | protein-coding | 82 | 7.0 | 2.5E-03 |
| lldD     | protein-coding | 81 | 7.0 | 2.8E-03 |
| nepl     | protein-coding | 81 | 6.9 | 6.1E-03 |
| csiE     | protein-coding | 81 | 6.9 | 2.5E-03 |
| ydcS     | protein-coding | 80 | 6.9 | 2.1E-03 |
| tRNA-Glu | tRNA           | 79 | 4.5 | 3.8E-04 |
| emtA     | protein-coding | 79 | 6.9 | 5.4E-03 |
| yedY     | protein-coding | 79 | 6.9 | 2.0E-03 |
| yhbE     | protein-coding | 79 | 6.9 | 5.4E-03 |
| ygaM     | protein-coding | 79 | 6.9 | 3.4E-03 |
| sulA     | protein-coding | 79 | 6.9 | 3.6E-03 |
| yehY     | protein-coding | 78 | 6.9 | 8.8E-03 |
| paaX     | protein-coding | 78 | 6.9 | 4.7E-03 |
| dcuA     | protein-coding | 77 | 5.9 | 6.5E-04 |
| phoP     | protein-coding | 77 | 6.9 | 2.3E-03 |
| yliF     | protein-coding | 77 | 6.9 | 2.5E-03 |
| ybhT     | protein-coding | 76 | 6.9 | 2.4E-03 |
| ycgN     | protein-coding | 76 | 6.9 | 3.3E-03 |
| ascB     | protein-coding | 76 | 6.8 | 3.6E-03 |
| potD     | protein-coding | 76 | 6.8 | 4.3E-03 |
| rpmE2    | protein-coding | 76 | 6.8 | 9.8E-03 |
| frvA     | protein-coding | 75 | 6.8 | 2.2E-03 |

|                |                |    |     |         |
|----------------|----------------|----|-----|---------|
| tRNA-Gly       | tRNA           | 75 | 6.8 | 2.3E-03 |
| ycgE *         | protein-coding | 75 | 6.8 | 6.6E-03 |
| yihF           | protein-coding | 74 | 5.8 | 5.5E-04 |
| yjgM           | protein-coding | 74 | 6.8 | 5.8E-03 |
| ydbK *         | protein-coding | 74 | 6.8 | 2.7E-03 |
| arsB           | protein-coding | 73 | 6.8 | 2.1E-03 |
| ypjB           | protein-coding | 72 | 6.8 | 3.0E-03 |
| ydgl           | protein-coding | 72 | 6.8 | 7.9E-03 |
| polA           | protein-coding | 72 | 6.8 | 5.3E-03 |
| chpS           | protein-coding | 71 | 6.8 | 2.4E-03 |
| yehB           | protein-coding | 71 | 5.7 | 6.4E-03 |
| yafM           | protein-coding | 70 | 6.7 | 2.5E-03 |
| pgpB           | protein-coding | 70 | 6.7 | 4.7E-03 |
| tnaL           | protein-coding | 70 | 5.8 | 5.2E-04 |
| rplP           | protein-coding | 70 | 6.7 | 5.7E-03 |
| def            | protein-coding | 69 | 6.7 | 5.9E-03 |
| hofD           | protein-coding | 69 | 6.7 | 2.3E-03 |
| yjel *         | protein-coding | 69 | 5.7 | 2.0E-03 |
| gudD           | protein-coding | 68 | 6.7 | 4.9E-03 |
| barA           | protein-coding | 68 | 6.7 | 3.6E-03 |
| fliY           | protein-coding | 67 | 6.7 | 2.6E-03 |
| gadX           | protein-coding | 67 | 6.7 | 5.5E-03 |
| ydch           | protein-coding | 67 | 6.7 | 3.1E-03 |
| menA           | protein-coding | 65 | 6.6 | 5.1E-03 |
| yjgN           | protein-coding | 65 | 6.6 | 8.5E-03 |
| purA           | protein-coding | 65 | 6.6 | 5.2E-03 |
| bgIF           | protein-coding | 64 | 6.6 | 7.4E-03 |
| ydeO           | protein-coding | 64 | 6.6 | 4.4E-03 |
| ygaQ           | pseudogene     | 63 | 4.7 | 1.0E-03 |
| fnr            | protein-coding | 63 | 6.6 | 9.2E-03 |
| STnc560_mgrR * | sRNA           | 63 | 4.3 | 2.7E-03 |
| cadC           | protein-coding | 62 | 6.6 | 5.9E-03 |
| yjiV           | pseudogene     | 61 | 6.5 | 6.1E-03 |
| hslJ           | protein-coding | 61 | 6.5 | 3.4E-03 |
| cysK           | protein-coding | 61 | 6.5 | 9.0E-03 |
| folA           | protein-coding | 61 | 6.5 | 3.4E-03 |
| ytfI           | protein-coding | 60 | 6.5 | 9.8E-03 |
| dcuB           | protein-coding | 60 | 6.5 | 5.5E-03 |
| ydjM           | protein-coding | 60 | 6.5 | 3.1E-03 |
| ychJ           | protein-coding | 60 | 6.5 | 4.6E-03 |
| greB           | protein-coding | 60 | 6.5 | 3.4E-03 |
| ycgG           | protein-coding | 60 | 6.5 | 3.7E-03 |
| yhhZ           | protein-coding | 60 | 5.5 | 1.4E-03 |
| glxK           | protein-coding | 60 | 6.5 | 7.8E-03 |
| yedQ           | protein-coding | 60 | 6.5 | 5.9E-03 |
| mnmG           | protein-coding | 59 | 6.5 | 8.0E-03 |

|        |                |    |     |         |
|--------|----------------|----|-----|---------|
| chiA   | protein-coding | 59 | 6.5 | 3.6E-03 |
| intB   | pseudogene     | 59 | 6.5 | 8.6E-03 |
| ybeL   | protein-coding | 58 | 6.5 | 8.8E-03 |
| kdpD   | protein-coding | 58 | 6.5 | 6.7E-03 |
| yaeT   | protein-coding | 58 | 6.5 | 4.8E-03 |
| yjiE   | protein-coding | 58 | 6.4 | 3.8E-03 |
| yihW   | protein-coding | 56 | 6.4 | 5.3E-03 |
| yhiD   | protein-coding | 56 | 6.4 | 6.8E-03 |
| yfiW   | protein-coding | 56 | 6.4 | 4.3E-03 |
| sopB   | protein-coding | 55 | 6.4 | 6.7E-03 |
| infC   | protein-coding | 55 | 6.4 | 5.8E-03 |
| helD * | protein-coding | 55 | 5.4 | 5.3E-03 |
| torT   | protein-coding | 54 | 6.4 | 8.0E-03 |
| yneK   | protein-coding | 54 | 6.4 | 6.6E-03 |
| yrhB   | protein-coding | 53 | 6.3 | 4.8E-03 |
| yohK   | protein-coding | 53 | 5.4 | 3.6E-03 |
| rstB   | protein-coding | 53 | 6.3 | 5.7E-03 |
| alkA   | protein-coding | 53 | 6.3 | 4.9E-03 |
| yicR   | protein-coding | 53 | 6.3 | 6.9E-03 |
| truD   | protein-coding | 52 | 6.3 | 6.1E-03 |
| repE   | protein-coding | 52 | 6.3 | 6.0E-03 |
| rpsC   | protein-coding | 51 | 6.3 | 8.9E-03 |
| tgt    | protein-coding | 51 | 6.3 | 6.9E-03 |
| ygeN   | pseudogene     | 51 | 6.3 | 7.7E-03 |
| caiA   | protein-coding | 51 | 6.3 | 6.3E-03 |
| hemC   | protein-coding | 51 | 6.3 | 7.9E-03 |
| yjcE   | protein-coding | 50 | 6.3 | 5.2E-03 |
| glpQ   | protein-coding | 50 | 6.3 | 8.5E-03 |
| ydck   | protein-coding | 50 | 6.3 | 5.2E-03 |
| fsaB   | protein-coding | 50 | 6.2 | 8.6E-03 |

Table S4: Results of the manual analysis of read coverage plots for the HELIOS NAD-Seq data set for *E. coli* K12 JM109 samples. The table highlights all identified gene features with transcription start sites (TSS) near or before the 5'-end of RNA transcripts and the identified location of the TSS (assembly ASM584v2, RefSeq accession GCF\_000005845.2) for NAD-capped transcripts. Gene features are ordered in descending order based on abundance (by read count). Gene features that were identified by manual analysis of read coverage plots appear at the end, as no baseMean was assigned to them.

| gene feature             | type of transcript | (pre-)5'-TSS | TSS location (NAD-capping) |
|--------------------------|--------------------|--------------|----------------------------|
| RNAI                     | sRNA_antisense     | known        | -1                         |
| SibD                     | sRNA_antisense     | known        | +1                         |
| SibE                     | sRNA_antisense     | known        | +1                         |
| ChiX (SroB)              | sRNA_regulatory    | known        | +1                         |
| GadY                     | sRNA_regulatory    | known        | +1                         |
| raiA                     | protein-coding RNA | alternative  | -30                        |
| SibC                     | sRNA_antisense     | known        | +1                         |
| RyeA (SraC)              | sRNA_antisense     | known        | -2                         |
| GcvB                     | sRNA_regulatory    | known        | +1                         |
| gatY                     | protein-coding RNA | known        | -29 through -27            |
| hdeD                     | protein-coding RNA | known        | -35                        |
| ompP                     | protein-coding RNA | suspected    | -31                        |
| pgk (lies in epd gene)   | protein-coding RNA | known        | -235                       |
| ymdB                     | protein-coding RNA | alternative  | -23                        |
| csdE (lies in csdA gene) | protein-coding RNA | suspected    | -59                        |
| bfr                      | protein-coding RNA | known        | -23                        |
| aspA                     | protein-coding RNA | known        | -104                       |
| yuaQ                     | protein-coding RNA | suspected    | -113                       |
| insX (ykgN)              | pseudogene         | known        | -14/-13                    |
| ldtA (erfK)              | protein-coding RNA | known        | -30                        |
| tqsA                     | protein-coding RNA | known        | -23                        |
| repA2                    | protein-coding RNA | suspected    | -33                        |
| ynfT (ydfJ)              | protein-coding RNA | alternative  | -176                       |
| racR                     | protein-coding RNA | known        | +1                         |
| tomB (ybaJ)              | protein-coding RNA | known        | -87/-86                    |
| ribA                     | protein-coding RNA | known        | -30                        |

|                                   |                    |             |              |
|-----------------------------------|--------------------|-------------|--------------|
| traY                              | protein-coding RNA | suspected   | -30          |
| nadR                              | protein-coding RNA | known       | -14 / -12    |
| CopA                              | sRNA_antisense     | known       | +2           |
| ubiT (yhbT)                       | protein-coding RNA | known       | -25          |
| frdA (wrongly assigned to poxA)   | protein-coding RNA | known       | +96          |
| rplT                              | protein-coding RNA | known       | -14          |
| ycbJ                              | protein-coding RNA | alternative | -25          |
| osmB                              | protein-coding RNA | known       | -43          |
| kdsC (wrongly identified as kdsD) | protein-coding RNA | known       | -555         |
| kdsC (2 <sup>nd</sup> )           |                    | known       | -263         |
| aroG                              | protein-coding RNA | alternative | -4           |
| CsrC                              | sRNA_regulatory    | known       | +1           |
| thrS                              | protein-coding RNA | known       | +162         |
| eno (wrongly assigned to pyrG)    | protein-coding RNA | alternative | -497         |
| yniB                              | protein-coding RNA | known       | -28/-29      |
| ygdH                              | protein-coding RNA | suspected   | -37          |
| ubiC                              | protein-coding RNA | alternative | -24          |
| glgS                              | protein-coding RNA | alternative | -50          |
| hycl                              | protein-coding RNA | suspected   | -59          |
| yfeX                              | protein-coding RNA | suspected   | -10          |
| bcsE (yhjS)                       | protein-coding RNA | known       | -15          |
| yoeG                              | pseudogene         | suspected   | -27          |
| yghB                              | protein-coding RNA | known       | -34          |
| ssrS (wrongly assigned to zapA)   | Non-coding RNA     | known       | -232         |
| ytfB                              | protein-coding RNA | known       | -102 (worse) |
| ytfB (2 <sup>nd</sup> )           |                    | alternative | -25 (better) |
| cbpA                              | protein-coding RNA | known       | -53          |
| uraA                              | protein-coding RNA | alternative | -15          |
| GlmZ (SraJ)                       | sRNA_regulatory    | known       | -1           |
| rob                               | protein-coding RNA | known       | -43          |
| bla                               | protein-coding RNA | suspected   | -35          |
| DsrA                              | sRNA_regulatory    | known       | +2           |



|                                  |                    |             |                                |
|----------------------------------|--------------------|-------------|--------------------------------|
| tRNA-Gly_glyU                    | tRNA               | suspected   | -12                            |
| slp                              | protein-coding RNA | alternative | -14                            |
| meIR                             | protein-coding RNA | known       | -22                            |
| exuR                             | protein-coding RNA | alternative | -28                            |
| yefM                             | protein-coding RNA | known       | -18                            |
| osmE                             | protein-coding RNA | known       | -27                            |
| ymgD                             | protein-coding RNA | suspected   | -10                            |
| dgcT (ycdT)                      | protein-coding RNA | known       | -37 / -35                      |
| fxsA                             | protein-coding RNA | known       | -61                            |
| yhhA                             | protein-coding RNA | known       | -23                            |
| dicA                             | protein-coding RNA | suspected   | -3                             |
| pgpC (yfhB)                      | protein-coding RNA | alternative | -42                            |
| ypfM                             | protein-coding RNA | alternative | -8 / -10                       |
| yebW                             | protein-coding RNA | known       | -24                            |
| mqsR                             | protein-coding RNA | known       | -18                            |
| ygiN (wrongly assigned to mdaB)  | protein-coding RNA | known       | -64                            |
| recF (wrongly assigned to dnaA)  | protein-coding RNA | known       | -410                           |
| recF (2 <sup>nd</sup> )          |                    | alternative | -268                           |
| glpA                             | protein-coding RNA | alternative | -26                            |
| glpA (2 <sup>nd</sup> )          |                    | known       | -63                            |
| mgsA                             | protein-coding RNA | known       | -26                            |
| ypfJ                             | protein-coding RNA | suspected   | -15                            |
| dcrB                             | protein-coding RNA | known       | -38                            |
| ucpA                             | protein-coding RNA | known       | -41                            |
| btuB                             | protein-coding RNA | alternative | -37                            |
| yqgA                             | protein-coding RNA | known       | -29                            |
| decR (ybaO)                      | protein-coding RNA | known       | -26                            |
| cysP (or cysPUWAM)               | protein-coding RNA | known       | -30                            |
| mgrB                             | protein-coding RNA | known       | -26                            |
| sokA (wrongly assigned to insK?) | pseudogene         | suspected   | +1252 (insK) or<br>-145 (sokA) |
| FinP                             | sRNA_antisense     | known       | +3                             |

|                                        |                    |             |      |
|----------------------------------------|--------------------|-------------|------|
| yfiR (2 <sup>nd</sup> )                | protein-coding RNA | known       | -51  |
| rraB (yjdD)                            | protein-coding RNA | alternative | -28  |
| MicL (wrongly assigned to cutC)        | sRNA_regulatory    | known       | -227 |
| trmJ                                   | protein-coding RNA | suspected   | -24  |
| cysB                                   | protein-coding RNA | alternative | -94  |
| nagC (wrongly assigned to nagA)        | protein-coding RNA | known       | -271 |
| rlmE                                   | protein-coding RNA | known       | -67  |
| atoS                                   | protein-coding RNA | suspected   | -28  |
| ygdR                                   | protein-coding RNA | known       | -21  |
| gnsA (sfa)                             | protein-coding RNA | alternative | -72  |
| dapA                                   | protein-coding RNA | known       | -24  |
| ymjA (wrongly assigned to puuP)        | protein-coding RNA | known       | -157 |
| hicA (yncN)                            | protein-coding RNA | known       | -11  |
| ccdA                                   | protein-coding RNA | suspected   | -32  |
| pdeB (ylaB)                            | protein-coding RNA | suspected   | -14  |
| pdeB (ylaB) (2 <sup>nd</sup> )         |                    | suspected   | -25  |
| rppH                                   | protein-coding RNA | alternative | -28  |
| hscC (wrongly assigned to rihA)        | protein-coding RNA | known       | -176 |
| alaS                                   | protein-coding RNA | known       | -79  |
| gmhB                                   | protein-coding RNA | known       | -27  |
| rpsA (wrongly assigned to cmk)         | protein-coding RNA | alternative | -304 |
| tRNA-Ser (serU)                        | tRNA               | known       | -8   |
| ubiD                                   | protein-coding RNA | known       | -16  |
| ytfP (wrongly assigned to tamB (ytfN)) | protein-coding RNA | suspected   | -232 |
| yaiS                                   | protein-coding RNA | alternative | -16  |
| aroC (wrongly assigned to prnB (yfcB)) | protein-coding RNA | suspected   | -154 |
| csrA                                   | protein-coding RNA | known       | -43  |
| csrA (2 <sup>nd</sup> )                |                    | known       | -127 |
| cycA                                   | protein-coding RNA | alternative | -52  |
| ydfG                                   | protein-coding RNA | known       | -26  |

|                                          |                    |             |         |
|------------------------------------------|--------------------|-------------|---------|
| SraB (PsrD)                              | sRNA               | known       | +2      |
| rnIB (wrongly assigned to rnIA (yfiN))   | protein-coding RNA | known       | -277    |
| ybhQ                                     | protein-coding RNA | known       | -30     |
| lptF                                     | protein-coding RNA | known       | -96     |
| yohJ (wrongly assigned to dusC)          | protein-coding RNA | known       | -129    |
| ysaA (wrongly assigned to yiaJ (plaR))   | protein-coding RNA | suspected   | -145    |
| cpdA (wrongly assigned to yqiB)          | protein-coding RNA | suspected   | -132    |
| yecH                                     | protein-coding RNA | alternative | -10     |
| hisL                                     | protein-coding RNA | known       | -33/-31 |
| yjbQ                                     | protein-coding RNA | known       | -25     |
| ldTD (ycbB)                              | protein-coding RNA | alternative | -12     |
| ldTD (ycbB) (2 <sup>nd</sup> )           |                    | known       | -116    |
| hupB                                     | protein-coding RNA | known       | -12     |
| yebG                                     | protein-coding RNA | alternative | -27     |
| asnA                                     | protein-coding RNA | known       | -23     |
| sodB                                     | protein-coding RNA | known       | -53     |
| yedK                                     | protein-coding RNA | suspected   | -19     |
| yifL                                     | protein-coding RNA | known       | -31     |
| ymdF                                     | protein-coding RNA | suspected   | -19     |
| csiE                                     | protein-coding RNA | known       | -24     |
| ydcS                                     | protein-coding RNA | known       | -58     |
| emtA                                     | protein-coding RNA | alternative | -4      |
| ygaM                                     | protein-coding RNA | known       | -25     |
| yehX (wrongly assigned to yehY?)         | protein-coding RNA | suspected   | -175    |
| paaX                                     | protein-coding RNA | known       | -29     |
| phoP                                     | protein-coding RNA | alternative | -25     |
| acrZ (ybhT)                              | protein-coding RNA | known       | -22     |
| ycgN                                     | protein-coding RNA | known       | -18     |
| ykgO (wrongly assigned to ykgM (rpmE2?)) | protein-coding RNA | suspected   | -173    |

|                                      |                    |             |      |
|--------------------------------------|--------------------|-------------|------|
| frvA                                 | protein-coding RNA | suspected   | -14  |
| bluR (ycgE)                          | protein-coding RNA | known       | -54  |
| ydbK                                 | protein-coding RNA | known       | -61  |
| polA                                 | protein-coding RNA | known       | -27  |
| chpS                                 | protein-coding RNA | known       | -17  |
| pgpB                                 | protein-coding RNA | known       | -21  |
| def                                  | protein-coding RNA | known       | -40  |
| blc (yjeI)                           | protein-coding RNA | known       | -26  |
| barA                                 | protein-coding RNA | suspected   | -297 |
| tcyJ (fliY)                          | protein-coding RNA | known       | -25  |
| tcyJ (fliY) (2 <sup>nd</sup> )       |                    | alternative | -83  |
| gadX                                 | protein-coding RNA | known       | -31  |
| rimL (wrongly assigned to ydcH)      | protein-coding RNA | alternative | -109 |
| purA                                 | protein-coding RNA | known       | -22  |
| fnr                                  | protein-coding RNA | known       | -26  |
| MgrR (STnc560)                       | sRNA_regulatory    | known       | +2   |
| hslJ                                 | protein-coding RNA | known       | -34  |
| folA                                 | protein-coding RNA | alternative | -35  |
| ydjM                                 | protein-coding RNA | alternative | -24  |
| ychJ                                 | protein-coding RNA | known       | -45  |
| greB                                 | protein-coding RNA | known       | -175 |
| pdeG (ycgG)                          | protein-coding RNA | known       | -64  |
| dgcQ (yedQ)                          | protein-coding RNA | suspected   | -24  |
| ybeL                                 | protein-coding RNA | known       | -25  |
| rpml (wrongly assigned to infC)      | protein-coding RNA | known       | -431 |
| helD                                 | protein-coding RNA | known       | -28  |
| umpG_surE (wrongly assigned to truD) | protein-coding RNA | alternative | -345 |
| repE                                 | protein-coding RNA | suspected   | -28  |
| yjcE                                 | protein-coding RNA | alternative | -63  |
| ydck                                 | protein-coding RNA | alternative | -22  |
| gldA (wrongly assigned to fsaB)      | protein-coding RNA | alternative | -62  |
| gldA (wrongly assigned to fsaB)      | protein-coding RNA | suspected   | -45  |

|                                 |                    |             |      |
|---------------------------------|--------------------|-------------|------|
| ytgA (counted with lptF)        | protein-coding RNA | known       | −127 |
| purU (wrongly assigned to ychJ) | protein-coding RNA | alternative | −117 |
| yhgF (wrongly assigned to greB) | protein-coding RNA | alternative | −7   |
| tcyP (ydjN)                     | protein-coding RNA | alternative | −61  |
| rpmE                            | protein-coding RNA | known       | +1   |
| GlmY (SroF)                     | sRNA_regulatory    | known       | +1   |
| IspZ (an sRNA)                  | sRNA_regulatory    | known       | +1   |
| McaS                            | sRNA_regulatory    | known       | −39  |
| acpP                            | protein-coding RNA | known       | −42  |
| glpD                            | protein-coding RNA | known       | −32  |
| ilvL                            | protein-coding RNA | known       | −38  |
| yfgG                            | protein-coding RNA | known       | −100 |
| clpP                            | protein-coding RNA | known       | −71  |
| glpF                            | protein-coding RNA | known       | −29  |
| rbsD                            | protein-coding RNA | known       | −59  |
| yafD                            | protein-coding RNA | known       | −27  |
| yafV                            | protein-coding RNA | known       | −53  |
| ychH                            | protein-coding RNA | suspected   | −36  |
| ynaJ                            | protein-coding RNA | suspected   | −10  |
| ynhF (cydH)                     | protein-coding RNA | known       | −38  |
| lacZ                            | protein-coding RNA | known       | −168 |
| ihfA (wrongly assigned to pheT) | protein-coding RNA | known       | −42  |
| thrL                            | protein-coding RNA | known       | −61  |
| rsuA                            | protein-coding RNA | alternative | −50  |
| bamE (smpA)                     | protein-coding RNA | known       | −50  |
| wrbA                            | protein-coding RNA | known       | +4   |
| RNAII                           | primer RNA         | known       | −37  |
| uspE                            | protein-coding RNA | known       | −1   |

Table S5: Results from the analysis of the eight most abundant transcripts (by normalized read count) identified in the HELIOS NAD-Seq sequencing data set for *E. coli* K12 JM109, and comparison of log<sub>2</sub>-fold change to the results from NAD captureSeq data sets 1 and 3 by Cahová et al<sup>1</sup>.

| Top 8 RNAs<br>(abundance) | HELIOS NAD-Seq                | NAD captureSeq (data set 1 / 3) |
|---------------------------|-------------------------------|---------------------------------|
|                           | log <sub>2</sub> -fold change | log <sub>2</sub> -fold change   |
| RNAI                      | 7.6                           | 3.1 / 6.5                       |
| SibD                      | 10.6                          | 3.8 / 6.3                       |
| SibE                      | 9.1                           | 2.9 / 6.5                       |
| sfsA                      | 10.5                          | 5.3 / 6.2                       |
| ChiX                      | 9.0                           | 4.7 / 4.3                       |
| GadY                      | 11.4                          | 4.1 / 6.1                       |
| raiA                      | 7.4                           | 2.5 / 4.4                       |
| SibC                      | 11.6                          | – / 5.7                         |

Table S6: Comparison of identified transcripts from NAD captureSeq data sets 1–3 with the hits from the HELIOS NAD-Seq data set for *E. coli* K12 JM109. NAD captureSeq data sets 1 and 3 were derived from *E. coli* K12 JM109 samples, whereas in NAD captureSeq data set 2 the *E. coli* K12 strain was analyzed<sup>1</sup>. In total, 102 transcripts from NAD captureSeq were also identified as NAD-capped RNAs by HELIOS NAD-Seq (75 of 80 transcripts of data set 1, 42 of 44 transcripts of data set 2, and 64 of 70 transcripts from data set 3 of NAD captureSeq). 12 gene features (from which 11 were identified in only a single data set of NAD captureSeq) were not found enriched using HELIOS NAD-Seq.

| RNA transcript | NAD captureSeq data set 1 (n = 80) | NAD captureSeq data set 2 (n = 44) | NAD captureSeq data set 3 (n = 70) | also found with HELIOS NAD-Seq? | also found with NAD tagSeq? |
|----------------|------------------------------------|------------------------------------|------------------------------------|---------------------------------|-----------------------------|
| acpP           | x                                  | x                                  | x                                  | yes                             | yes                         |
| aroM           |                                    |                                    | x                                  | no                              | no                          |
| aspA           | x                                  | x                                  | x                                  | yes                             | yes                         |
| bla            | x                                  |                                    | x                                  | yes                             | no                          |
| bsmA           | x                                  |                                    | x                                  | yes                             | yes                         |
| cbpA           | x                                  |                                    |                                    | yes                             | no                          |
| cdsA (rseP?)   | x                                  |                                    | x                                  | yes                             | yes                         |
| clpP           | x                                  |                                    |                                    | yes                             | yes                         |
| CopA           | x                                  |                                    | x                                  | yes                             | no                          |
| csdA           |                                    |                                    | x                                  | yes                             | no                          |
| csrA           | x                                  | x                                  |                                    | yes                             | yes                         |
| CsrC           | x                                  |                                    | x                                  | yes                             | yes                         |
| cycA           | x                                  |                                    | x                                  | yes                             | yes                         |
| dapA           |                                    |                                    | x                                  | yes                             | yes                         |
| dcrB           | x                                  |                                    |                                    | yes                             | yes                         |
| dicA           |                                    | x                                  |                                    | yes                             | no                          |
| DsrA           | x                                  |                                    | x                                  | yes                             | no                          |
| epd (pgk)      | x                                  | x                                  | x                                  | yes                             | yes                         |
| eptB           |                                    | x                                  |                                    | no                              | no                          |
| exuR           | x                                  |                                    | x                                  | no                              | yes                         |
| fxsA           |                                    | x                                  |                                    | yes                             | yes                         |
| GadY           | x                                  | x                                  | x                                  | yes                             | no                          |
| gatY           | x                                  | x                                  | x                                  | yes                             | no                          |

|                 |   |   |   |     |     |
|-----------------|---|---|---|-----|-----|
| GcvB            | x | x | x | yes | yes |
| glcD            | x |   |   | no  | no  |
| glgX (glgC?)    | x |   | x | yes | yes |
| GlmY_tke1       |   | x | x | yes | yes |
| glpA            | x |   | x | yes | yes |
| glpD            | x |   | x | yes | yes |
| glpF            | x |   |   | yes | yes |
| hdeD            | x | x | x | yes | no  |
| helD            | x |   |   | yes | no  |
| hemY            |   | x |   | no  | no  |
| hisL            | x | x |   | yes | no  |
| hspQ            | x |   |   | yes | yes |
| ilvL            | x | x | x | yes | no  |
| insK            | x |   |   | yes | no  |
| IS061<br>(McaS) | x | x | x | yes | no  |
| kdsD            | x |   |   | yes | no  |
| lacZ            |   |   | x | yes | no  |
| lrrA            |   |   | x | yes | yes |
| melR            |   |   | x | yes | yes |
| mgrB            | x |   |   | yes | yes |
| mgsA            |   | x | x | yes | yes |
| nagA (nagC)     | x | x | x | yes | yes |
| nsrR            | x |   |   | yes | yes |
| ompP            | x |   |   | yes | no  |
| osmE            | x | x |   | yes | yes |
| pheT (ihfA)     |   | x | x | yes | yes |
| polB            | x |   |   | no  | no  |
| poxA            | x |   | x | yes | no  |
| pyrG (eno?)     | x | x | x | yes | no  |
| QUAD (SibC)     |   | x | x | yes | yes |
| QUAD (SibD)     | x | x | x | yes | yes |
| QUAD (SibE)     | x | x | x | yes | yes |



|                   |   |   |   |     |     |
|-------------------|---|---|---|-----|-----|
| racR              | x |   | x | yes | no  |
| raiA              | x | x | x | yes | yes |
| rbsD              | x |   |   | yes | no  |
| rlmE              | x | x |   | yes | yes |
| rlmI              |   |   | x | yes | no  |
| RNAI              | x |   | x | yes | no  |
| RNAII             | x |   | x | yes | no  |
| rob               | x |   |   | yes | yes |
| rppH              | x |   | x | yes | yes |
| rsuA              |   | x |   | yes | no  |
| secY (rpmJ?)      | x | x | x | yes | yes |
| sfsA (dksA?)      | x | x | x | yes | yes |
| smpA              |   | x |   | yes | no  |
| sodB              | x |   |   | yes | yes |
| SraC_RyeA         | x |   | x | yes | yes |
| SroB              | x | x | x | yes | no  |
| STnc560<br>(MgrR) | x | x | x | yes | no  |
| thrA (thrB?)      | x |   | x | yes | no  |
| thrL              |   | x |   | yes | no  |
| thrS              | x |   | x | yes | yes |
| tqsA              |   |   | x | yes | no  |
| traG              |   |   | x | yes | no  |
| traY              | x |   | x | yes | no  |
| trmJ              | x | x | x | yes | yes |
| ucpA              | x |   | x | yes | yes |
| uspE              | x | x | x | yes | yes |
| wrbA              |   | x |   | yes | no  |
| yafD              | x |   |   | yes | yes |
| yafV              | x |   |   | yes | yes |
| yaiO              |   |   | x | yes | no  |
| ybaO              |   |   | x | yes | no  |
| ycbJ              | x |   | x | yes | yes |

|              |   |   |   |     |     |
|--------------|---|---|---|-----|-----|
| ycgE         | x |   | x | yes | no  |
| ychH         | x |   |   | yes | yes |
| ydbK         | x |   |   | yes | no  |
| ydcW         |   |   | x | no  | no  |
| ydfJ         |   |   | x | yes | no  |
| ydiS         |   |   | x | no  | no  |
| ydjN         |   |   | x | yes | yes |
| yebW         |   | x |   | yes | no  |
| yegR         |   |   | x | no  | no  |
| yfcB (aroC?) | x | x | x | yes | yes |
| yfcO (yfcB?) | x | x |   | yes | yes |
| yfgG         | x | x | x | yes | yes |
| ygdH         | x |   |   | yes | yes |
| yghB         | x | x |   | yes | yes |
| ygjR         | x |   |   | no  | no  |
| yhhA         |   |   | x | yes | no  |
| yidF         | x |   |   | no  | no  |
| yjel         |   | x |   | yes | no  |
| yjhB         |   |   | x | no  | no  |
| ykgN         | x |   |   | yes | no  |
| ynaJ         | x |   |   | yes | yes |
| ynhF         | x |   |   | yes | no  |
| yniB         |   |   | x | yes | yes |
| ypfJ         | x |   |   | yes | no  |
| yqiB (cpdA?) | x |   | x | yes | yes |
| ytfB         |   | x |   | yes | yes |
| zapA (ssrS)  | x | x | x | yes | yes |

Table S7: Overlap of sequencing hits from NAD captureSeq data sets 1–3 with the HELIOS NAD-Seq data set for *E. coli* K12 JM109. Individual transcripts found by both methods are summarized in Table S6. NAD captureSeq data sets 1 and 3 were derived from *E. coli* K12 JM109 samples, whereas in NAD captureSeq data set 2 the *E. coli* K12 strain was analyzed<sup>1</sup>.

| comparison of sequencing hits                                           | number of hits fulfilling the condition | number of hits <u>also</u> found with HELIOS NAD-Seq | number of hits <u>not</u> found with HELIOS NAD-Seq |
|-------------------------------------------------------------------------|-----------------------------------------|------------------------------------------------------|-----------------------------------------------------|
| overlap of NAD captureSeq data sets 1, 2 and 3 (all)                    | 23                                      | 23                                                   | 0                                                   |
| overlap of NAD captureSeq data sets 1 and 3 ( <i>E. coli</i> K12 JM109) | 47                                      | 46                                                   | 1                                                   |
| overlap of NAD captureSeq data sets 1 and 2                             | 29                                      | 29                                                   | 0                                                   |
| overlap of NAD captureSeq data sets 2 and 3                             | 27                                      | 27                                                   | 0                                                   |
| hits exclusive to NAD captureSeq data set 1                             | 27                                      | 23                                                   | 4                                                   |
| hits exclusive to NAD captureSeq data set 2                             | 11                                      | 9                                                    | 2                                                   |
| hits exclusive to NAD captureSeq data set 3                             | 19                                      | 14                                                   | 5                                                   |
| hits identified in NAD captureSeq data set 1, but not in 3              | 33                                      | 29                                                   | 4                                                   |
| hits identified in NAD captureSeq data set 3, but not in 1              | 23                                      | 18                                                   | 5                                                   |

Table S8: NAD-capped transcripts detected in at least two of the timepoints, including gene name, functional category, maximum baseMean, maximum log<sub>2</sub> fold change, and lowest adjusted *p*-value.

| gene name | gene category  | Num Time Points | Time Points                                                        | adjusted pvalue (best) | log2-fold change (max) | Base Mean (max) |
|-----------|----------------|-----------------|--------------------------------------------------------------------|------------------------|------------------------|-----------------|
| rna1      | ncRNA          | 15              | tp1,tp2,tp3,tp4,tp5,tp6, tp7,tp8,tp9,tp10,tp11,tp12,tp14,tp15,tp16 | 1.90E-42               | 11.1                   | 16631           |
| hicA      | protein_coding | 13              | tp1,tp3,tp4,tp6,tp7,tp8, tp9,tp10,tp11,tp12,tp14,tp15,tp16         | 6.20E-08               | 10.7                   | 439             |
| gadY      | ncRNA          | 12              | tp1,tp2,tp3,tp4,tp6,tp7, tp8,tp9,tp11,tp12,tp14, tp16              | 6.80E-08               | 10.1                   | 738             |
| rlmI      | protein_coding | 11              | tp1,tp2,tp3,tp4,tp5,tp6, tp7,tp8,tp9,tp10,tp12                     | 2.00E-11               | 10.6                   | 477             |
| yjel      | protein_coding | 10              | tp1,tp2,tp3,tp4,tp5,tp6, tp7,tp8,tp9,tp12                          | 1.50E-10               | 10.9                   | 553             |
| cdsA      | protein_coding | 10              | tp1,tp4,tp7,tp8,tp9,tp10,tp11,tp12,tp14,tp15                       | 2.00E-05               | 10                     | 227             |
| sibD      | ncRNA          | 9               | tp1,tp2,tp3,tp4,tp5,tp6, tp7,tp8,tp12                              | 1.30E-13               | 9.4                    | 2742            |
| chiX      | ncRNA          | 9               | tp1,tp2,tp3,tp4,tp5,tp6, tp7,tp8,tp12                              | 1.40E-11               | 10.6                   | 892             |
| gcvB      | ncRNA          | 9               | tp1,tp2,tp3,tp4,tp5,tp6, tp7,tp8,tp12                              | 5.50E-11               | 9.6                    | 377             |
| tomB      | protein_coding | 9               | tp1,tp2,tp3,tp4,tp5,tp6, tp7,tp8,tp12                              | 1.80E-09               | 10.9                   | 439             |
| sibE      | ncRNA          | 8               | tp1,tp2,tp4,tp5,tp6,tp7, tp8,tp12                                  | 2.50E-31               | 10.7                   | 1210            |
| sibC      | ncRNA          | 8               | tp1,tp3,tp4,tp5,tp6,tp7, tp8,tp12                                  | 2.40E-09               | 11.6                   | 613             |
| tpiA      | protein_coding | 8               | tp1,tp3,tp4,tp5,tp6,tp7, tp8,tp12                                  | 8.00E-08               | 10.8                   | 344             |
| yfgG      | protein_coding | 8               | tp1,tp3,tp4,tp5,tp6,tp7, tp8,tp12                                  | 9.70E-08               | 10.9                   | 366             |
| csrC      | ncRNA          | 8               | tp1,tp3,tp4,tp5,tp6,tp7, tp8,tp12                                  | 1.00E-05               | 7.7                    | 338             |

|        |                |   |                                    |          |      |      |
|--------|----------------|---|------------------------------------|----------|------|------|
| ppnN   | protein_coding | 8 | tp4,tp6,tp7,tp8,tp9,tp11,tp12,tp15 | 5.80E-05 | 9.6  | 510  |
| glyW   | tRNA           | 7 | tp1,tp2,tp3,tp4,tp5,tp6,tp7        | 1.80E-12 | 9.1  | 626  |
| secY   | protein_coding | 7 | tp1,tp3,tp5,tp6,tp7,tp8,tp12       | 1.10E-09 | 9.7  | 268  |
| nagA   | protein_coding | 7 | tp1,tp3,tp4,tp6,tp7,tp8,tp12       | 2.80E-09 | 9.4  | 209  |
| leuS   | protein_coding | 7 | tp1,tp4,tp5,tp9,tp10,tp11,tp14     | 2.50E-06 | 9.8  | 197  |
| yejF   | protein_coding | 7 | tp1,tp3,tp4,tp5,tp6,tp8,tp12       | 4.00E-06 | 9.1  | 103  |
| kdsD   | protein_coding | 7 | tp1,tp4,tp5,tp6,tp7,tp8,tp12       | 4.50E-06 | 9.2  | 229  |
| insH21 | protein_coding | 7 | tp1,tp4,tp7,tp8,tp9,tp11,tp14      | 9.80E-06 | 8.7  | 159  |
| insH4  | protein_coding | 7 | tp4,tp7,tp9,tp10,tp11,tp14,tp15    | 1.80E-05 | 10   | 240  |
| serV   | tRNA           | 6 | tp1,tp2,tp3,tp4,tp5,tp6            | 1.10E-21 | 8.1  | 1791 |
| gatY   | protein_coding | 6 | tp4,tp5,tp6,tp7,tp8,tp12           | 3.80E-13 | 11.4 | 879  |
| thrU   | tRNA           | 6 | tp1,tp2,tp3,tp4,tp5,tp6            | 5.30E-09 | 4.9  | 536  |
| pdhR   | protein_coding | 6 | tp1,tp2,tp3,tp4,tp5,tp8            | 8.40E-09 | 6.2  | 1601 |
| betT   | protein_coding | 6 | tp1,tp4,tp6,tp7,tp8,tp9            | 1.30E-08 | 7.2  | 201  |
| ileX   | tRNA           | 6 | tp1,tp2,tp4,tp5,tp6,tp7            | 4.80E-06 | 5.9  | 186  |
| ackA   | protein_coding | 6 | tp1,tp3,tp4,tp7,tp8,tp12           | 6.50E-06 | 8.9  | 92   |
| miaA   | protein_coding | 6 | tp3,tp4,tp7,tp8,tp9,tp12           | 2.50E-05 | 7.7  | 87   |
| insH3  | protein_coding | 6 | tp4,tp7,tp9,tp10,tp11,tp14         | 2.80E-05 | 8.1  | 240  |
| ftsE   | protein_coding | 6 | tp3,tp4,tp6,tp7,tp8,tp12           | 8.00E-05 | 8.3  | 62   |
| rplN   | protein_coding | 6 | tp6,tp7,tp8,tp9,tp11,tp12          | 5.00E-04 | 7.2  | 41   |

|       |                |   |                             |          |      |     |
|-------|----------------|---|-----------------------------|----------|------|-----|
| cutC  | protein_coding | 6 | tp7,tp9,tp11,tp12,tp15,tp16 | 9.70E-04 | 10.2 | 248 |
| yghB  | protein_coding | 5 | tp4,tp6,tp7,tp8,tp12        | 6.20E-17 | 9.4  | 538 |
| sfsA  | protein_coding | 5 | tp6,tp7,tp8,tp12,tp14       | 2.70E-10 | 11.8 | 709 |
| slyD  | protein_coding | 5 | tp4,tp6,tp7,tp8,tp12        | 6.60E-10 | 9.8  | 274 |
| zapG  | protein_coding | 5 | tp4,tp6,tp7,tp8,tp12        | 7.00E-08 | 8.8  | 142 |
| epd   | protein_coding | 5 | tp4,tp6,tp7,tp8,tp12        | 7.80E-08 | 8.5  | 362 |
| dnaG  | protein_coding | 5 | tp1,tp4,tp6,tp7,tp9         | 8.40E-08 | 7    | 111 |
| ymdB  | protein_coding | 5 | tp4,tp6,tp7,tp8,tp12        | 1.00E-07 | 10.2 | 225 |
| ssrA  | ncRNA          | 5 | tp1,tp2,tp3,tp4,tp7         | 1.80E-07 | 6    | 815 |
| ldtE  | protein_coding | 5 | tp6,tp7,tp8,tp9,tp12        | 2.20E-07 | 10.3 | 266 |
| nrdH  | protein_coding | 5 | tp1,tp2,tp3,tp4,tp7         | 1.00E-06 | 8.5  | 113 |
| bcsE  | protein_coding | 5 | tp4,tp6,tp7,tp8,tp12        | 1.20E-06 | 9.7  | 160 |
| proK  | tRNA           | 5 | tp5,tp9,tp10,tp11,tp12      | 1.30E-06 | 5.2  | 686 |
| insH1 | protein_coding | 5 | tp7,tp9,tp10,tp11,tp14      | 1.10E-05 | 8.4  | 288 |
| insX  | pseudogene     | 5 | tp1,tp4,tp7,tp8,tp12        | 1.20E-05 | 8.8  | 87  |
| insH6 | protein_coding | 5 | tp7,tp9,tp10,tp11,tp14      | 9.80E-05 | 9.9  | 214 |
| frdA  | protein_coding | 4 | tp6,tp7,tp8,tp12            | 4.10E-12 | 10.5 | 447 |
| gcvT  | protein_coding | 4 | tp6,tp7,tp8,tp12            | 1.30E-09 | 11.7 | 660 |
| fruB  | protein_coding | 4 | tp5,tp6,tp7,tp8             | 1.30E-08 | 11   | 395 |
| bluR  | protein_coding | 4 | tp4,tp7,tp8,tp12            | 2.30E-08 | 10.7 | 329 |

|      |                |   |                     |          |      |     |
|------|----------------|---|---------------------|----------|------|-----|
| acpP | protein_coding | 4 | tp1,tp4,tp7,tp8     | 6.80E-08 | 8.7  | 133 |
| tqsA | protein_coding | 4 | tp4,tp7,tp8,tp12    | 5.90E-07 | 9.6  | 151 |
| aaeR | protein_coding | 4 | tp6,tp7,tp8,tp12    | 6.20E-07 | 10.1 | 211 |
| ymcE | protein_coding | 4 | tp4,tp6,tp7,tp8     | 2.20E-06 | 9.4  | 125 |
| dcrB | protein_coding | 4 | tp4,tp7,tp8,tp9     | 2.30E-06 | 9.6  | 147 |
| yfjI | protein_coding | 4 | tp7,tp8,tp11,tp12   | 2.50E-06 | 9.2  | 110 |
| pheT | protein_coding | 4 | tp4,tp7,tp8,tp12    | 3.00E-06 | 9.1  | 107 |
| fimH | protein_coding | 4 | tp4,tp7,tp8,tp12    | 3.60E-06 | 9.3  | 120 |
| yaiO | protein_coding | 4 | tp6,tp7,tp8,tp12    | 4.50E-06 | 9.8  | 169 |
| ychJ | protein_coding | 4 | tp6,tp7,tp8,tp12    | 8.00E-06 | 9.1  | 107 |
| rimJ | protein_coding | 4 | tp4,tp6,tp7,tp8     | 9.80E-06 | 9.1  | 107 |
| yadM | protein_coding | 4 | tp3,tp7,tp8,tp12    | 1.70E-05 | 8.9  | 95  |
| mepH | protein_coding | 4 | tp6,tp7,tp8,tp12    | 1.80E-05 | 8.5  | 67  |
| ldtD | protein_coding | 4 | tp7,tp9,tp10,tp11   | 4.40E-05 | 8.2  | 47  |
| yehA | protein_coding | 4 | tp10,tp11,tp14,tp15 | 4.50E-05 | 9.9  | 220 |
| aspA | protein_coding | 4 | tp6,tp7,tp8,tp12    | 4.60E-05 | 7.9  | 463 |
| ppiD | protein_coding | 4 | tp9,tp10,tp11,tp14  | 4.60E-05 | 9.4  | 152 |
| adeQ | protein_coding | 4 | tp7,tp8,tp11,tp12   | 6.30E-05 | 8.4  | 67  |
| tamB | protein_coding | 4 | tp3,tp4,tp7,tp12    | 8.10E-05 | 8.8  | 78  |
| yheS | protein_coding | 4 | tp4,tp6,tp7,tp12    | 9.30E-05 | 7.9  | 45  |

|      |                |   |                   |          |      |     |
|------|----------------|---|-------------------|----------|------|-----|
| ispZ | ncRNA          | 4 | tp1,tp4,tp7,tp9   | 1.00E-04 | 8.3  | 62  |
| ydhF | protein_coding | 4 | tp7,tp9,tp11,tp14 | 3.80E-04 | 9.2  | 125 |
| casD | protein_coding | 4 | tp6,tp7,tp8,tp12  | 4.40E-04 | 8.6  | 71  |
| cspD | protein_coding | 4 | tp4,tp6,tp8,tp12  | 1.10E-03 | 7.9  | 44  |
| osmE | protein_coding | 3 | tp7,tp8,tp12      | 3.80E-13 | 11.2 | 732 |
| mcaS | ncRNA          | 3 | tp4,tp7,tp12      | 2.50E-10 | 7.4  | 309 |
| cas3 | protein_coding | 3 | tp4,tp7,tp8       | 3.20E-10 | 9.7  | 261 |
| cnu  | protein_coding | 3 | tp1,tp4,tp7       | 1.30E-08 | 7.6  | 97  |
| ydbK | protein_coding | 3 | tp4,tp7,tp8       | 4.40E-08 | 10.6 | 296 |
| rpsT | protein_coding | 3 | tp4,tp7,tp8       | 5.20E-08 | 10.5 | 285 |
| ychH | protein_coding | 3 | tp7,tp8,tp12      | 6.80E-08 | 10.4 | 265 |
| yajO | protein_coding | 3 | tp1,tp7,tp8       | 6.90E-08 | 9.9  | 306 |
| trmA | protein_coding | 3 | tp7,tp8,tp12      | 8.40E-08 | 8.8  | 98  |
| uspB | protein_coding | 3 | tp7,tp8,tp12      | 1.40E-07 | 7.9  | 62  |
| insK | protein_coding | 3 | tp1,tp4,tp7       | 5.60E-07 | 9.8  | 161 |
| waaU | protein_coding | 3 | tp4,tp7,tp8       | 7.50E-07 | 9.6  | 153 |
| exbB | protein_coding | 3 | tp4,tp7,tp8       | 2.00E-06 | 9.6  | 145 |
| pepD | protein_coding | 3 | tp7,tp9,tp11      | 2.20E-06 | 9.4  | 127 |
| yaaJ | protein_coding | 3 | tp4,tp7,tp8       | 2.20E-06 | 9.2  | 116 |
| yfcO | protein_coding | 3 | tp4,tp7,tp12      | 2.30E-06 | 9.4  | 127 |



|      |                |   |               |          |     |      |
|------|----------------|---|---------------|----------|-----|------|
| nadR | protein_coding | 3 | tp7,tp8,tp12  | 4.40E-06 | 9   | 100  |
| dsrA | ncRNA          | 3 | tp1,tp4,tp7   | 4.50E-06 | 8.9 | 113  |
| rraB | protein_coding | 3 | tp4,tp7,tp12  | 5.10E-06 | 9   | 98   |
| fxsA | protein_coding | 3 | tp4,tp7,tp8   | 5.50E-06 | 6.7 | 77   |
| mgrB | protein_coding | 3 | tp1,tp4,tp7   | 6.90E-06 | 8.8 | 83   |
| valU | tRNA           | 3 | tp2,tp4,tp5   | 7.40E-06 | 5.9 | 153  |
| ycgZ | protein_coding | 3 | tp4,tp5,tp7   | 9.80E-06 | 8.7 | 78   |
| raiA | protein_coding | 3 | tp6,tp7,tp8   | 1.00E-05 | 5.8 | 1091 |
| betA | protein_coding | 3 | tp7,tp8,tp12  | 1.70E-05 | 8.5 | 71   |
| efp  | protein_coding | 3 | tp7,tp8,tp12  | 1.80E-05 | 8.6 | 72   |
| citC | protein_coding | 3 | tp1,tp4,tp7   | 1.90E-05 | 8.7 | 81   |
| kdsC | protein_coding | 3 | tp7,tp8,tp12  | 1.90E-05 | 8.6 | 73   |
| nuoG | protein_coding | 3 | tp7,tp8,tp12  | 2.20E-05 | 8.4 | 67   |
| ybdD | protein_coding | 3 | tp9,tp10,tp11 | 2.80E-05 | 8.2 | 32   |
| cysZ | protein_coding | 3 | tp7,tp8,tp12  | 2.90E-05 | 8.6 | 76   |
| purA | protein_coding | 3 | tp4,tp7,tp8   | 3.10E-05 | 8.2 | 58   |
| betI | protein_coding | 3 | tp3,tp4,tp7   | 4.00E-05 | 8.3 | 62   |
| cspA | protein_coding | 3 | tp3,tp4,tp7   | 5.00E-05 | 6.6 | 59   |
| ypfJ | protein_coding | 3 | tp4,tp7,tp12  | 5.40E-05 | 8.3 | 62   |
| fbaA | protein_coding | 3 | tp7,tp8,tp12  | 6.00E-05 | 8.4 | 63   |

|      |                |   |               |          |     |     |
|------|----------------|---|---------------|----------|-----|-----|
| hemC | protein_coding | 3 | tp4,tp7,tp12  | 6.20E-05 | 8.4 | 65  |
| tyrU | tRNA           | 3 | tp9,tp10,tp11 | 6.40E-05 | 5.3 | 89  |
| metK | protein_coding | 3 | tp4,tp7,tp8   | 8.80E-05 | 7.9 | 45  |
| exuR | protein_coding | 3 | tp4,tp7,tp8   | 9.30E-05 | 8.4 | 86  |
| mIaA | protein_coding | 3 | tp7,tp9,tp12  | 9.30E-05 | 8.9 | 88  |
| lpxD | protein_coding | 3 | tp1,tp4,tp7   | 1.50E-04 | 7.7 | 39  |
| cvrA | protein_coding | 3 | tp4,tp7,tp12  | 1.60E-04 | 7.7 | 40  |
| yfeO | protein_coding | 3 | tp7,tp8,tp12  | 1.60E-04 | 7   | 40  |
| puuD | protein_coding | 3 | tp4,tp7,tp12  | 2.00E-04 | 8.1 | 52  |
| tig  | protein_coding | 3 | tp4,tp6,tp7   | 2.10E-04 | 7   | 36  |
| glvC | protein_coding | 3 | tp4,tp7,tp12  | 2.60E-04 | 8   | 50  |
| rsmE | protein_coding | 3 | tp4,tp6,tp7   | 2.70E-04 | 8   | 49  |
| yraH | protein_coding | 3 | tp6,tp7,tp8   | 2.70E-04 | 7.9 | 46  |
| rplT | protein_coding | 3 | tp7,tp8,tp12  | 2.80E-04 | 7.5 | 35  |
| hemA | protein_coding | 3 | tp1,tp4,tp7   | 3.50E-04 | 7.2 | 60  |
| tpx  | protein_coding | 3 | tp7,tp8,tp12  | 6.00E-04 | 7.9 | 42  |
| zntA | protein_coding | 3 | tp7,tp9,tp11  | 8.40E-04 | 7.3 | 30  |
| ycbZ | protein_coding | 3 | tp4,tp7,tp8   | 1.30E-03 | 6.9 | 89  |
| ptsG | protein_coding | 2 | tp4,tp7       | 6.80E-08 | 6.9 | 192 |
| zapA | protein_coding | 2 | tp7,tp8       | 3.40E-07 | 9.8 | 173 |

|      |                |   |          |          |     |     |
|------|----------------|---|----------|----------|-----|-----|
| hdeD | protein_coding | 2 | tp4,tp7  | 8.90E-07 | 9.6 | 148 |
| ribA | protein_coding | 2 | tp4,tp7  | 1.20E-06 | 9.4 | 128 |
| yagJ | protein_coding | 2 | tp7,tp8  | 1.20E-06 | 6.9 | 67  |
| ycfH | protein_coding | 2 | tp7,tp8  | 2.50E-06 | 9.6 | 148 |
| ydgA | protein_coding | 2 | tp7,tp8  | 2.70E-06 | 9.4 | 129 |
| ybeL | protein_coding | 2 | tp7,tp12 | 2.80E-06 | 6.6 | 58  |
| ybil | protein_coding | 2 | tp4,tp7  | 3.00E-06 | 9.1 | 104 |
| opgG | protein_coding | 2 | tp4,tp7  | 3.90E-06 | 9.1 | 100 |
| yifL | protein_coding | 2 | tp4,tp7  | 6.00E-06 | 9.1 | 106 |
| ybhA | protein_coding | 2 | tp4,tp7  | 6.50E-06 | 9   | 98  |
| ispF | protein_coding | 2 | tp7,tp8  | 7.40E-06 | 7.6 | 61  |
| fliZ | protein_coding | 2 | tp7,tp12 | 7.80E-06 | 7.2 | 47  |
| thrL | protein_coding | 2 | tp4,tp7  | 8.00E-06 | 7.7 | 65  |
| dnaK | protein_coding | 2 | tp4,tp7  | 1.00E-05 | 8.6 | 77  |
| ubiC | protein_coding | 2 | tp4,tp7  | 1.30E-05 | 8.7 | 82  |
| metZ | tRNA           | 2 | tp4,tp5  | 1.40E-05 | 6.6 | 102 |
| yhcD | protein_coding | 2 | tp4,tp7  | 1.40E-05 | 8.8 | 86  |
| yieE | protein_coding | 2 | tp4,tp7  | 1.40E-05 | 8.5 | 70  |
| ryfD | ncRNA          | 2 | tp7,tp8  | 1.70E-05 | 9.1 | 103 |
| talA | protein_coding | 2 | tp7,tp8  | 1.80E-05 | 6.1 | 35  |

|      |                |   |          |          |     |     |
|------|----------------|---|----------|----------|-----|-----|
| moeA | protein_coding | 2 | tp4,tp7  | 2.50E-05 | 8.5 | 70  |
| yagK | protein_coding | 2 | tp7,tp8  | 2.60E-05 | 8.5 | 69  |
| ydbA | pseudogene     | 2 | tp7,tp12 | 2.90E-05 | 8.4 | 64  |
| moaA | protein_coding | 2 | tp4,tp7  | 3.00E-05 | 8.3 | 61  |
| alaA | protein_coding | 2 | tp4,tp7  | 3.10E-05 | 8.4 | 64  |
| epmA | protein_coding | 2 | tp7,tp12 | 3.10E-05 | 8.2 | 55  |
| osmB | protein_coding | 2 | tp7,tp8  | 3.10E-05 | 6.1 | 171 |
| wrbA | protein_coding | 2 | tp7,tp8  | 3.10E-05 | 8.5 | 69  |
| ybdO | protein_coding | 2 | tp4,tp7  | 3.10E-05 | 8.5 | 70  |
| mraZ | protein_coding | 2 | tp4,tp7  | 3.60E-05 | 5.5 | 78  |
| ydfG | protein_coding | 2 | tp4,tp7  | 3.70E-05 | 8.3 | 61  |
| sulA | protein_coding | 2 | tp7,tp12 | 3.80E-05 | 8.1 | 52  |
| tusB | protein_coding | 2 | tp7,tp8  | 4.30E-05 | 7.4 | 55  |
| bsmA | protein_coding | 2 | tp7,tp12 | 4.70E-05 | 9   | 96  |
| dgcE | protein_coding | 2 | tp4,tp7  | 4.80E-05 | 8.1 | 52  |
| rlmJ | protein_coding | 2 | tp4,tp7  | 4.80E-05 | 8.1 | 51  |
| ybgC | protein_coding | 2 | tp7,tp12 | 5.10E-05 | 8.1 | 52  |
| thrS | protein_coding | 2 | tp4,tp7  | 5.40E-05 | 8.6 | 73  |
| rbsZ | ncRNA          | 2 | tp3,tp4  | 5.60E-05 | 7.2 | 48  |
| rpmE | protein_coding | 2 | tp7,tp8  | 5.80E-05 | 8   | 50  |

|      |                |   |          |          |     |    |
|------|----------------|---|----------|----------|-----|----|
| ybdM | protein_coding | 2 | tp4,tp7  | 6.30E-05 | 8.2 | 56 |
| cyoA | protein_coding | 2 | tp4,tp7  | 7.10E-05 | 8   | 47 |
| ysgD | protein_coding | 2 | tp3,tp4  | 7.10E-05 | 8.1 | 53 |
| ung  | protein_coding | 2 | tp4,tp7  | 8.60E-05 | 7.8 | 43 |
| ybdR | protein_coding | 2 | tp7,tp8  | 8.80E-05 | 8.2 | 55 |
| yabP | protein_coding | 2 | tp7,tp12 | 9.00E-05 | 7.8 | 44 |
| yigG | protein_coding | 2 | tp4,tp7  | 9.00E-05 | 8.1 | 52 |
| glgX | protein_coding | 2 | tp7,tp12 | 1.10E-04 | 7.9 | 47 |
| bamE | protein_coding | 2 | tp4,tp7  | 1.30E-04 | 6.9 | 31 |
| gltF | protein_coding | 2 | tp4,tp7  | 1.30E-04 | 7.7 | 39 |
| ftsK | protein_coding | 2 | tp3,tp4  | 1.50E-04 | 7.6 | 37 |
| hemY | protein_coding | 2 | tp4,tp7  | 1.50E-04 | 8   | 49 |
| ubiE | protein_coding | 2 | tp4,tp7  | 1.50E-04 | 7.6 | 36 |
| rluE | protein_coding | 2 | tp4,tp7  | 1.60E-04 | 7.6 | 38 |
| ygjR | protein_coding | 2 | tp7,tp12 | 1.60E-04 | 7.7 | 41 |
| ykfJ | pseudogene     | 2 | tp4,tp7  | 1.60E-04 | 8.2 | 56 |
| ygiD | protein_coding | 2 | tp7,tp8  | 1.70E-04 | 7.9 | 47 |
| yqiB | protein_coding | 2 | tp4,tp7  | 1.70E-04 | 7.5 | 35 |
| insJ | protein_coding | 2 | tp4,tp7  | 1.80E-04 | 7.6 | 36 |
| atoS | protein_coding | 2 | tp4,tp7  | 2.00E-04 | 7.7 | 41 |

|      |                |   |          |          |     |    |
|------|----------------|---|----------|----------|-----|----|
| dadX | protein_coding | 2 | tp4,tp7  | 2.00E-04 | 7.4 | 33 |
| hdeA | protein_coding | 2 | tp4,tp7  | 2.00E-04 | 7.8 | 42 |
| uspE | protein_coding | 2 | tp8,tp12 | 2.00E-04 | 7.6 | 56 |
| ftnB | protein_coding | 2 | tp7,tp12 | 2.10E-04 | 6.3 | 36 |
| lgoT | protein_coding | 2 | tp4,tp7  | 2.10E-04 | 7.7 | 40 |
| mscS | protein_coding | 2 | tp4,tp7  | 2.10E-04 | 7.9 | 45 |
| yjhF | protein_coding | 2 | tp4,tp7  | 2.10E-04 | 7.6 | 36 |
| asnA | protein_coding | 2 | tp4,tp7  | 2.50E-04 | 7.4 | 31 |
| pfkA | protein_coding | 2 | tp4,tp7  | 2.50E-04 | 7.9 | 47 |
| ompF | protein_coding | 2 | tp4,tp7  | 2.70E-04 | 7.4 | 31 |
| ykgS | protein_coding | 2 | tp7,tp12 | 2.90E-04 | 7.3 | 30 |
| amyA | protein_coding | 2 | tp4,tp7  | 3.00E-04 | 6.5 | 29 |
| yaiT | pseudogene     | 2 | tp4,tp7  | 3.00E-04 | 7.3 | 30 |
| talB | protein_coding | 2 | tp4,tp7  | 3.20E-04 | 7.6 | 37 |
| yccA | protein_coding | 2 | tp4,tp7  | 3.50E-04 | 7.2 | 27 |
| zapB | protein_coding | 2 | tp4,tp7  | 3.50E-04 | 6   | 21 |
| groS | protein_coding | 2 | tp5,tp7  | 3.70E-04 | 7.3 | 31 |
| cmk  | protein_coding | 2 | tp7,tp12 | 4.20E-04 | 7.3 | 30 |
| fucP | protein_coding | 2 | tp7,tp12 | 4.20E-04 | 7.4 | 33 |
| yoeG | pseudogene     | 2 | tp4,tp7  | 4.20E-04 | 7.5 | 35 |

|      |                |   |          |          |     |    |
|------|----------------|---|----------|----------|-----|----|
| ygiF | protein_coding | 2 | tp4,tp7  | 4.40E-04 | 7.1 | 26 |
| yjjV | protein_coding | 2 | tp7,tp12 | 4.40E-04 | 8.7 | 74 |
| yfcH | protein_coding | 2 | tp7,tp12 | 4.50E-04 | 7.2 | 28 |
| cycA | protein_coding | 2 | tp4,tp7  | 5.40E-04 | 6.8 | 54 |
| nhaA | protein_coding | 2 | tp4,tp7  | 6.30E-04 | 7.4 | 33 |
| sraG | ncRNA          | 2 | tp4,tp7  | 7.20E-04 | 7.2 | 28 |
| lysU | protein_coding | 2 | tp4,tp7  | 7.70E-04 | 7.2 | 28 |
| uxuR | protein_coding | 2 | tp4,tp7  | 7.90E-04 | 7   | 25 |
| uraA | protein_coding | 2 | tp4,tp7  | 8.30E-04 | 7   | 24 |
| sodA | protein_coding | 2 | tp4,tp7  | 8.90E-04 | 6.9 | 47 |
| wzzB | protein_coding | 2 | tp4,tp7  | 8.90E-04 | 6.9 | 22 |
| amiB | protein_coding | 2 | tp4,tp7  | 9.20E-04 | 7.2 | 28 |
| gspL | protein_coding | 2 | tp4,tp7  | 9.20E-04 | 6.1 | 17 |
| glcD | protein_coding | 2 | tp7,tp12 | 9.40E-04 | 7.3 | 28 |
| yadC | protein_coding | 2 | tp4,tp7  | 1.00E-03 | 6.9 | 23 |
| yfiL | protein_coding | 2 | tp7,tp12 | 1.00E-03 | 7.9 | 43 |
| pqqL | protein_coding | 2 | tp8,tp12 | 1.10E-03 | 6.7 | 31 |
| hns  | protein_coding | 2 | tp4,tp7  | 1.30E-03 | 6.8 | 21 |
| trpR | protein_coding | 2 | tp4,tp7  | 1.40E-03 | 6.6 | 19 |
| lptD | protein_coding | 2 | tp7,tp12 | 1.50E-03 | 6.8 | 21 |

|      |                |   |          |          |     |     |
|------|----------------|---|----------|----------|-----|-----|
| ycgX | protein_coding | 2 | tp7,tp14 | 1.50E-03 | 9.4 | 150 |
| yciC | protein_coding | 2 | tp7,tp12 | 1.60E-03 | 7.5 | 34  |
| yhfA | protein_coding | 2 | tp4,tp7  | 1.70E-03 | 6.6 | 20  |
| pldA | protein_coding | 2 | tp4,tp7  | 1.80E-03 | 6.6 | 19  |
| yliM | protein_coding | 2 | tp4,tp7  | 1.80E-03 | 6.6 | 19  |
| nirC | protein_coding | 2 | tp4,tp7  | 1.90E-03 | 6.3 | 19  |
| parC | protein_coding | 2 | tp7,tp12 | 1.90E-03 | 6.8 | 21  |
| srkA | protein_coding | 2 | tp4,tp7  | 2.00E-03 | 6.7 | 20  |
| ytjE | protein_coding | 2 | tp4,tp7  | 2.00E-03 | 6.6 | 18  |
| bfd  | protein_coding | 2 | tp4,tp8  | 2.10E-03 | 6   | 23  |
| rpIP | protein_coding | 2 | tp9,tp12 | 2.10E-03 | 7.5 | 31  |
| serU | tRNA           | 2 | tp4,tp7  | 2.10E-03 | 6.6 | 18  |
| envC | protein_coding | 2 | tp4,tp7  | 2.30E-03 | 6.5 | 17  |
| accD | protein_coding | 2 | tp4,tp7  | 2.40E-03 | 6.6 | 19  |
| lptB | protein_coding | 2 | tp7,tp8  | 2.40E-03 | 6.8 | 21  |
| pgi  | protein_coding | 2 | tp4,tp7  | 2.90E-03 | 6.3 | 15  |
| yhhA | protein_coding | 2 | tp7,tp9  | 3.30E-03 | 6   | 32  |
| yncE | protein_coding | 2 | tp4,tp7  | 3.30E-03 | 6.7 | 20  |
| gmK  | protein_coding | 2 | tp4,tp7  | 3.40E-03 | 6.3 | 17  |
| ahpC | protein_coding | 2 | tp4,tp7  | 3.60E-03 | 6.4 | 16  |



|      |                |   |         |          |     |    |
|------|----------------|---|---------|----------|-----|----|
| ilvI | protein_coding | 2 | tp4,tp7 | 5.10E-03 | 6.5 | 18 |
| fdhD | protein_coding | 2 | tp4,tp7 | 6.10E-03 | 6.2 | 14 |

Table S9: Gene membership of Clusters 1–3 from the dynamic NAD-capped RNA heatmap (Figure 3e), with functional categories, KEGG pathway annotations, and cluster assignment

| Gene name | Gene biotype   | KEGG pathway                                | Cluster |
|-----------|----------------|---------------------------------------------|---------|
| serV      | tRNA           | Aminoacyl-tRNA biosynthesis                 | 1       |
| yejF      | protein_coding | ABC transporters                            | 1       |
| ssrA      | ncRNA          | Non-coding RNAs                             | 1       |
| yjeI      | protein_coding | N/A                                         | 1       |
| amyA      | protein_coding | Starch and sucrose metabolism               | 1       |
| purA      | protein_coding | Nucleotide metabolism                       | 1       |
| tomB      | protein_coding | Prokaryotic defense system                  | 1       |
| alaA      | protein_coding | Alanine, aspartate and glutamate metabolism | 1       |
| rlmJ      | protein_coding | Ribosome biogenesis                         | 1       |
| atoS      | protein_coding | Protein kinases                             | 1       |
| metK      | protein_coding | Cysteine and methionine metabolism          | 1       |
| yccA      | protein_coding | Transporters                                | 1       |
| rna1      | ncRNA          | N/A                                         | 1       |
| moeA      | protein_coding | Folate biosynthesis                         | 1       |
| yoeG      | pseudogene     | N/A                                         | 1       |
| fliZ      | protein_coding | Biofilm formation                           | 1       |
| yajO      | protein_coding | N/A                                         | 1       |
| asnA      | protein_coding | Alanine, aspartate and glutamate metabolism | 1       |
| yjhF      | protein_coding | Transporters                                | 1       |
| ygiD      | protein_coding | N/A                                         | 1       |
| groS      | protein_coding | Chaperones and folding catalysts            | 1       |
| wzzB      | protein_coding | Lipopolysaccharide biosynthesis proteins    | 1       |
| yfcH      | protein_coding | N/A                                         | 1       |
| sibE      | ncRNA          | Prokaryotic defense system                  | 1       |
| betI      | protein_coding | Transcription factors                       | 1       |
| yncE      | protein_coding | N/A                                         | 1       |
| ybhA      | protein_coding | N/A                                         | 1       |
| uxuR      | protein_coding | Transcription factors                       | 1       |
| ysgD      | protein_coding | N/A                                         | 1       |
| hns       | protein_coding | Chromosome and associated proteins          | 1       |
| ahpC      | protein_coding | N/A                                         | 1       |
| nirC      | protein_coding | Transporters                                | 1       |
| zapG      | protein_coding | N/A                                         | 1       |
| thrL      | protein_coding | N/A                                         | 1       |
| dadX      | protein_coding | D-Amino acid metabolism                     | 1       |
| dgcE      | protein_coding | Biofilm formation                           | 1       |
| gmK       | protein_coding | Purine metabolism                           | 1       |
| yieE      | protein_coding | N/A                                         | 1       |
| pgi       | protein_coding | Glycolysis / Gluconeogenesis                | 1       |
| zapB      | protein_coding | Chromosome and associated proteins          | 1       |
| citC      | protein_coding | Two-component system                        | 1       |

|      |                |                                                     |   |
|------|----------------|-----------------------------------------------------|---|
| exuR | protein_coding | Transcription factors                               | 1 |
| gspL | protein_coding | Bacterial secretion system                          | 1 |
| yigG | protein_coding | N/A                                                 | 1 |
| rbsZ | ncRNA          | N/A                                                 | 1 |
| moaA | protein_coding | Folate biosynthesis                                 | 1 |
| yqiB | protein_coding | N/A                                                 | 1 |
| ybdO | protein_coding | N/A                                                 | 1 |
| thrS | protein_coding | Aminoacyl-tRNA biosynthesis                         | 1 |
| parC | protein_coding | DNA replication proteins                            | 1 |
| pldA | protein_coding | Glycerophospholipid metabolism                      | 1 |
| mgrB | protein_coding | N/A                                                 | 1 |
| kdsD | protein_coding | Biosynthesis of various nucleotide sugars           | 1 |
| hemY | protein_coding | N/A                                                 | 1 |
| glyW | tRNA           | Aminoacyl-tRNA biosynthesis                         | 1 |
| cyoA | protein_coding | Oxidative phosphorylation                           | 1 |
| amiB | protein_coding | Cationic antimicrobial peptide                      | 1 |
| dnaK | protein_coding | RNA degradation                                     | 1 |
| cnu  | protein_coding | N/A                                                 | 1 |
| sodA | protein_coding | Peroxisome                                          | 1 |
| talB | protein_coding | Pentose phosphate pathway                           | 1 |
| yadC | protein_coding | N/A                                                 | 1 |
| cysZ | protein_coding | N/A                                                 | 1 |
| ribA | protein_coding | Riboflavin metabolism                               | 1 |
| ung  | protein_coding | Base excision repair                                | 1 |
| ubiC | protein_coding | Ubiquinone and other terpenoid-quinone biosynthesis | 1 |
| sraG | ncRNA          | N/A                                                 | 1 |
| ryfD | ncRNA          | N/A                                                 | 1 |
| ytjE | protein_coding | N/A                                                 | 1 |
| bamE | protein_coding | Transporters                                        | 1 |
| secY | protein_coding | Protein export                                      | 1 |
| ydfG | protein_coding | Pyrimidine metabolism                               | 1 |
| ygiF | protein_coding | N/A                                                 | 1 |
| ubiE | protein_coding | Ubiquinone and other terpenoid-quinone biosynthesis | 1 |
| acpP | protein_coding | Fatty acid biosynthesis                             | 1 |
| nhaA | protein_coding | Transporters                                        | 1 |
| thrU | tRNA           | Aminoacyl-tRNA biosynthesis                         | 1 |
| ftsK | protein_coding | Chromosome and associated proteins                  | 1 |
| cvrA | protein_coding | Transporters                                        | 1 |
| dsrA | ncRNA          | Biofilm formation                                   | 1 |
| ompF | protein_coding | Two-component system                                | 1 |
| rluE | protein_coding | Ribosome biogenesis                                 | 1 |
| accD | protein_coding | Pyruvate metabolism                                 | 1 |
| pfkA | protein_coding | Glycolysis / Gluconeogenesis                        | 1 |
| chiX | ncRNA          | Messenger RNA biogenesis                            | 1 |

|      |                |                                             |   |
|------|----------------|---------------------------------------------|---|
| nagA | protein_coding | Amino sugar and nucleotide sugar metabolism | 1 |
| rraB | protein_coding | Messenger RNA biogenesis                    | 1 |
| uraA | protein_coding | Transporters                                | 1 |
| yliM | protein_coding | N/A                                         | 1 |
| insX | pseudogene     | N/A                                         | 1 |
| hemA | protein_coding | Porphyrin metabolism                        | 1 |
| envC | protein_coding | N/A                                         | 1 |
| cycA | protein_coding | Transporters                                | 1 |
| yaaJ | protein_coding | N/A                                         | 1 |
| insK | protein_coding | N/A                                         | 1 |
| ileX | tRNA           | Aminoacyl-tRNA biosynthesis                 | 1 |
| lpxD | protein_coding | Lipopolysaccharide biosynthesis             | 1 |
| bfd  | protein_coding | N/A                                         | 1 |
| yfcO | protein_coding | N/A                                         | 1 |
| gcvB | ncRNA          | Biofilm formation                           | 1 |
| lptD | protein_coding | Transporters                                | 1 |
| lgoT | protein_coding | Transporters                                | 1 |
| yheS | protein_coding | Translation factors                         | 1 |
| yhfA | protein_coding | N/A                                         | 1 |
| insJ | protein_coding | N/A                                         | 1 |
| yifL | protein_coding | N/A                                         | 1 |
| csrC | ncRNA          | Biofilm formation                           | 1 |
| ydbK | protein_coding | Glycolysis / Gluconeogenesis                | 1 |
| sibC | ncRNA          | Prokaryotic defense system                  | 1 |
| cspA | protein_coding | N/A                                         | 1 |
| sibD | ncRNA          | Prokaryotic defense system                  | 1 |
| glvC | protein_coding | Starch and sucrose metabolism               | 1 |
| rsmE | protein_coding | Ribosome biogenesis                         | 1 |
| tig  | protein_coding | N/A                                         | 1 |
| trpR | protein_coding | Transcription factors                       | 1 |
| nrdH | protein_coding | N/A                                         | 1 |
| hdeA | protein_coding | Chaperones and folding catalysts            | 1 |
| glfF | protein_coding | N/A                                         | 1 |
| opgG | protein_coding | N/A                                         | 1 |
| metZ | tRNA           | Aminoacyl-tRNA biosynthesis                 | 1 |
| zapA | protein_coding | Chromosome and associated proteins          | 1 |
| pdhR | protein_coding | Transcription factors                       | 1 |
| serU | tRNA           | Aminoacyl-tRNA biosynthesis                 | 2 |
| pheT | protein_coding | Aminoacyl-tRNA biosynthesis                 | 2 |
| valU | tRNA           | Aminoacyl-tRNA biosynthesis                 | 2 |
| fxsA | protein_coding | N/A                                         | 2 |
| ykfJ | pseudogene     | N/A                                         | 2 |
| lysU | protein_coding | Aminoacyl-tRNA biosynthesis                 | 2 |
| ycfH | protein_coding | N/A                                         | 2 |
| fbaA | protein_coding | Glycolysis / Gluconeogenesis                | 2 |
| yagJ | protein_coding | N/A                                         | 2 |

|      |                |                                                |   |
|------|----------------|------------------------------------------------|---|
| mraZ | protein_coding | Transcription factors                          | 2 |
| tqsA | protein_coding | N/A                                            | 2 |
| ybeL | protein_coding | N/A                                            | 2 |
| fimH | protein_coding | Secretion system                               | 2 |
| cmk  | protein_coding | Pyrimidine metabolism                          | 2 |
| frdA | protein_coding | Citrate cycle (TCA cycle)                      | 2 |
| ybil | protein_coding | N/A                                            | 2 |
| gatY | protein_coding | Galactose metabolism                           | 2 |
| fruB | protein_coding | Phosphotransferase system                      | 2 |
| yhcD | protein_coding | N/A                                            | 2 |
| tamB | protein_coding | Transporters                                   | 2 |
| cas3 | protein_coding | Prokaryotic defense system                     | 2 |
| ilvI | protein_coding | Butanoate metabolism                           | 2 |
| yadM | protein_coding | N/A                                            | 2 |
| ackA | protein_coding | Pyruvate metabolism                            | 2 |
| ybgC | protein_coding | N/A                                            | 2 |
| ypfJ | protein_coding | N/A                                            | 2 |
| rpsT | protein_coding | Ribosome                                       | 2 |
| hemC | protein_coding | Porphyrin metabolism                           | 2 |
| rimJ | protein_coding | Ribosome biogenesis                            | 2 |
| casD | protein_coding | Prokaryotic defense system                     | 2 |
| epmA | protein_coding | Translation factors                            | 2 |
| osmB | protein_coding | N/A                                            | 2 |
| tusB | protein_coding | Sulfur relay system                            | 2 |
| yciC | protein_coding | N/A                                            | 2 |
| kdsC | protein_coding | Biosynthesis of various nucleotide<br>sugars   | 2 |
| mscS | protein_coding | Transporters                                   | 2 |
| ydgA | protein_coding | N/A                                            | 2 |
| tpx  | protein_coding | N/A                                            | 2 |
| tpiA | protein_coding | Glycolysis / Gluconeogenesis                   | 2 |
| exbB | protein_coding | Transporters                                   | 2 |
| mepH | protein_coding | Peptidases and inhibitors                      | 2 |
| talA | protein_coding | Pentose phosphate pathway                      | 2 |
| slyD | protein_coding | Chaperones and folding catalysts               | 2 |
| ychJ | protein_coding | N/A                                            | 2 |
| uspB | protein_coding | Transporters                                   | 2 |
| fdhD | protein_coding | N/A                                            | 2 |
| yraH | protein_coding | Secretion system                               | 2 |
| bcsE | protein_coding | N/A                                            | 2 |
| yaiT | pseudogene     | N/A                                            | 2 |
| rplT | protein_coding | Ribosome                                       | 2 |
| ymcE | protein_coding | N/A                                            | 2 |
| ptsG | protein_coding | Glycolysis / Gluconeogenesis                   | 2 |
| fucP | protein_coding | Transporters                                   | 2 |
| aspA | protein_coding | Alanine, aspartate and glutamate<br>metabolism | 2 |

|      |                |                                                     |   |
|------|----------------|-----------------------------------------------------|---|
| cspD | protein_coding | N/A                                                 | 2 |
| lptB | protein_coding | ABC transporters                                    | 2 |
| sfsA | protein_coding | N/A                                                 | 2 |
| yfjI | protein_coding | N/A                                                 | 2 |
| uspE | protein_coding | N/A                                                 | 2 |
| rpmE | protein_coding | Ribosome                                            | 2 |
| ybdR | protein_coding | N/A                                                 | 2 |
| wrbA | protein_coding | Ubiquinone and other terpenoid-quinone biosynthesis | 2 |
| glcD | protein_coding | Glyoxylate and dicarboxylate metabolism             | 2 |
| ftnB | protein_coding | N/A                                                 | 2 |
| bluR | protein_coding | Transcription factors                               | 2 |
| ybdM | protein_coding | N/A                                                 | 2 |
| glgX | protein_coding | Starch and sucrose metabolism                       | 2 |
| yaiO | protein_coding | N/A                                                 | 2 |
| efp  | protein_coding | Translation factors                                 | 2 |
| raiA | protein_coding | Ribosome biogenesis                                 | 2 |
| rlmI | protein_coding | Ribosome biogenesis                                 | 2 |
| ydbA | pseudogene     | N/A                                                 | 2 |
| nuoG | protein_coding | Oxidative phosphorylation                           | 2 |
| epd  | protein_coding | Vitamin B6 metabolism                               | 2 |
| gcvT | protein_coding | Glyoxylate and dicarboxylate metabolism             | 2 |
| osmE | protein_coding | N/A                                                 | 2 |
| yfgG | protein_coding | N/A                                                 | 2 |
| yghB | protein_coding | N/A                                                 | 2 |
| aaeR | protein_coding | Transcription factors                               | 2 |
| miaA | protein_coding | Prenyltransferases                                  | 2 |
| yjjV | protein_coding | N/A                                                 | 2 |
| hdeD | protein_coding | N/A                                                 | 2 |
| ispF | protein_coding | Terpenoid backbone biosynthesis                     | 2 |
| srkA | protein_coding | N/A                                                 | 2 |
| ycgZ | protein_coding | Signaling proteins                                  | 2 |
| betT | protein_coding | Transporters                                        | 2 |
| betA | protein_coding | Glycine, serine and threonine metabolism            | 2 |
| ftsE | protein_coding | ABC transporters                                    | 2 |
| ychH | protein_coding | N/A                                                 | 2 |
| ymdB | protein_coding | N/A                                                 | 2 |
| pqqL | protein_coding | Peptidases and inhibitors                           | 2 |
| waaU | protein_coding | Lipopolysaccharide biosynthesis                     | 2 |
| ycbZ | protein_coding | Peptidases and inhibitors                           | 2 |
| mcaS | ncRNA          | Biofilm formation                                   | 2 |
| hicA | protein_coding | Prokaryotic defense system                          | 3 |
| pepD | protein_coding | Glutathione metabolism                              | 3 |
| proK | tRNA           | Aminoacyl-tRNA biosynthesis                         | 3 |
| leuS | protein_coding | Aminoacyl-tRNA biosynthesis                         | 3 |

|        |                |                                        |   |
|--------|----------------|----------------------------------------|---|
| ppnN   | protein_coding | Purine metabolism                      | 3 |
| adeQ   | protein_coding | Transporters                           | 3 |
| yabP   | protein_coding | N/A                                    | 3 |
| ycgX   | protein_coding | N/A                                    | 3 |
| yfeO   | protein_coding | Transporters                           | 3 |
| cdsA   | protein_coding | Glycerophospholipid metabolism         | 3 |
| tyrU   | tRNA           | Aminoacyl-tRNA biosynthesis            | 3 |
| ydhF   | protein_coding | N/A                                    | 3 |
| nadR   | protein_coding | Nicotinate and nicotinamide metabolism | 3 |
| ldtD   | protein_coding | Peptidases and inhibitors              | 3 |
| sulA   | protein_coding | Chromosome and associated proteins     | 3 |
| yfiL   | protein_coding | N/A                                    | 3 |
| ykgS   | protein_coding | N/A                                    | 3 |
| insH1  | protein_coding | N/A                                    | 3 |
| yehA   | protein_coding | N/A                                    | 3 |
| m1aA   | protein_coding | N/A                                    | 3 |
| ygiR   | protein_coding | N/A                                    | 3 |
| trmA   | protein_coding | Transfer RNA biogenesis                | 3 |
| insH4  | protein_coding | N/A                                    | 3 |
| insH21 | protein_coding | N/A                                    | 3 |
| puuD   | protein_coding | Arginine and proline metabolism        | 3 |
| bsmA   | protein_coding | N/A                                    | 3 |
| cutC   | protein_coding | N/A                                    | 3 |
| ybdD   | protein_coding | N/A                                    | 3 |
| insH3  | protein_coding | N/A                                    | 3 |
| zntA   | protein_coding | N/A                                    | 3 |
| yagK   | protein_coding | N/A                                    | 3 |
| dcrB   | protein_coding | N/A                                    | 3 |
| yhhA   | protein_coding | N/A                                    | 3 |
| ppiD   | protein_coding | Chaperones and folding catalysts       | 3 |
| gadY   | ncRNA          | Messenger RNA biogenesis               | 3 |
| rplP   | protein_coding | Ribosome                               | 3 |
| rplN   | protein_coding | Ribosome                               | 3 |
| insH6  | protein_coding | N/A                                    | 3 |
| ldtE   | protein_coding | Peptidases and inhibitors              | 3 |
| dnaG   | protein_coding | DNA replication                        | 3 |
| ispZ   | ncRNA          | N/A                                    | 3 |

Table S10: Table of sequences for RNA oligonucleotides, DNA templates, primers, and DNA adapters

| RNA oligonucleotides                  | sequence (5'–3')                                                                                                                                                                                                                                                             |
|---------------------------------------|------------------------------------------------------------------------------------------------------------------------------------------------------------------------------------------------------------------------------------------------------------------------------|
| 113 nt model RNA                      | AGAUCACAGAGAUGUGAUGGAAAAUAGUUGAUGAGUUGUUUA<br>AUUUUAAGAAUUUUUAUCUUAUUAAGGAAGGAGUGAUUUCAA<br>UGGCACAAGAUUCAUUUCAACAAUCGG                                                                                                                                                      |
| 113 nt model RNA probe (86mer)        | AUUGAAAUCACUCCUCCUUAUUAAGAUAAAAAUUCUAAAA<br>UUAACAACUCAUCAACUAAUUUCCAUCACAUCUCUGUGAUCU                                                                                                                                                                                       |
| <i>E. coli</i> 5S rRNA probe (60mer)  | GGCGCUACGGCGUUUCACUUCUGAGUUCGGCAUGGGGUCAG<br>GUGGGACCACCGCGCUACG                                                                                                                                                                                                             |
| <i>E. coli</i> 16S rRNA probe (60mer) | GGCGUGGACUACCAGGGUAUCUAAUCCUGUUUGCUCCCCACG<br>CUUUCGCACCUGAGCGUC                                                                                                                                                                                                             |
| <i>E. coli</i> 23S rRNA probe (60mer) | GGCACCAUUUUGCCUAGUUCUACCCGAGUUCUCUCAAGC<br>GCCUUGGUAAUUCUCUACC                                                                                                                                                                                                               |
| biotin-RNA (internal standard)        | AGGGAAGUGCUACCACAACUUUAGCCAUA AUGUCACUUCUGC<br>CGCGGGCAUGCGGCCAGCCA                                                                                                                                                                                                          |
| IS-036 (=36 nt model RNA)             | ACUGACUUGAACGCGAUUCUUUAUCAGCGCGAUAAC                                                                                                                                                                                                                                         |
| IS-051                                | ACGUACGCUCCGACACUUGGAGUACUCGGCGCUGUAAUCGG<br>GCUGAUUGCC                                                                                                                                                                                                                      |
| IS-060                                | AUCGAAGAGCCAGUUGCAGCCGCCAUCGGAGCGGAUUUACCG<br>GUUGAUGAGCCGGUUGCC                                                                                                                                                                                                             |
| IS-102A                               | AUCAAGCAAUCCGCCGAUAAUCGCGACAUCUGUGCCGUGGCC<br>CUUAUACGUUUCGCAAACGAGCCGUAAAAAGAUACAAUGAU<br>GCGCUCAGGCUCUCUGCC                                                                                                                                                                |
| IS-102B                               | ACAGUCUGGAUGUUUACGCCAACAU CGACGGUUACCUCACUG<br>AUACGCUCAGCCAUAUUUUUGAAGAAGCAAUCGGAUUUGCGG<br>GCUGUGAGCUGAUACGAC                                                                                                                                                              |
| IS-122                                | AGAUGACCUGCUCUCCCGAGUCUCUGGAUGUCUGCCGUUCAUG<br>CGAAUACAGAUCCGAUUUUCGCUAAAUCCAAGCUGUUCAUCU<br>CAAUCGCGCAUUGCUUCGUAAUAAAUCCAUAUCUGCC                                                                                                                                           |
| IS-149                                | ACUGCAGGAGCGAGGCGUCUCGCGUGCCUGAAAGACUUCUUCU<br>AUUGUCUCGUCGACGUAAAUUCAGUAAUUUGCCAUAAGCA<br>ACAGGUGCAUCGAUACUGCCUGCGAUCGACUUCACUAACGUC<br>GUCUUUCCGUUUCAGGAGGUCC                                                                                                              |
| IS-200                                | ACCUGGACCAGAAGUUUGAGCUCAUCAAUUUGCCCGCUUA<br>UCCACUGGACAUGGGAUGACGUUUGGACGUACAUCGCCUGC<br>ACAAUUUGCCUUUAACAAACUGCACGAUCAACAUUAUCCGAG<br>CAUAGGCUGUGAAAUGUGUACACUGCCUUCUCCCGGACCCGAA<br>CGAUGAGAGGGCUGGAAGAUGGGCCGGACGG                                                        |
| IS-250                                | AUGAUGCCGGGCGGCUGUUUCCGCGUCACGGCUUUGAAGC<br>UGGCGGUCUCUAAUAACAGAAAGAGGCAGAAACGUCGCCCGG<br>CCGAAGGAAUUCUGCUUUAAUAUUGAAUCGCUUUGCGGGCA<br>GAUUGUUCAUCGUCGGUCACGACGUGUUGAGCAGAAGCGCC<br>GAGCGCUAAUUCAAUGGCCGUUUCAUACUUCUGUUCUGUAGA<br>AAUCAGCUCAAGAACCGCUCGCGGAUUUCCGCCAAGGCGCUC |



| IS-301                         | AUGCAUCCAUAACGAAUUGGCUGCCGCAUAAUCGGCUUGUC<br>CAGCGUUUCCUAAACAUC <sup>CCG</sup> GAAACAGAGAAGAAAAUGAA<br>AAAGUCCAAUGGGGAAAUCCUUGCUGCAUUCGUCUACAUGUAA<br>CAACCCGCUCACUUUUGGCUGCAACACUUCUUGAAACUCUUC<br>AUUCGUUUUAUGAAUGAUGAAGCGAUCUUUACUGCGUGCCUGC<br>ACCGUGAAUAAU <sup>UCCA</sup> UUGAGAGUGCCAUAUCUUUCUUUGAU<br>U <sup>UCCU</sup> CCAAAAGAUGACGAACCGCAUGCUGAUCACUUACAUC<br>AGCCUC                                                                                                                                                                                                                                      |
|--------------------------------|----------------------------------------------------------------------------------------------------------------------------------------------------------------------------------------------------------------------------------------------------------------------------------------------------------------------------------------------------------------------------------------------------------------------------------------------------------------------------------------------------------------------------------------------------------------------------------------------------------------------|
| IS-351                         | AGACCUCUUGUCCCGCCUGUAAUAAGCAGGACUUUGUCUGUU<br>GAAAACGAUACUUGCUUAUGACUUAGAGCGGCUUCUGCUGGC<br>UGCUCUGUCAAAUAUGCGCGAUAU <sup>CGC</sup> UGUCCGUUUCGAUAA<br>CAGACUUCUGAUUCUGUGCUCUUGGCAUAAU <sup>UAU</sup> CAACUGCA<br>AUCAGUCUGGCCAGCUC <sup>CUCA</sup> UGAGAGGCUUCGCAU <sup>UCCA</sup> UA<br>UCUGCAUGUCUUGAAGUAAGAUGGCUGUACUCACUUUGAAGC<br>AUGCGGUAAUAAACCGGCCCGUGAAGCACCAGACAAAAGAACA<br>CCCUCAUUUGCGUAGGCCUCCAGCCCCUUUGUACACCCAAG<br>ACCGUCAAUGAUGC                                                                                                                                                                   |
| IS-400                         | ACUGCCAGGUCUCCAAGCGCAACGAUCCCGACUAGAUUGUUU<br>UGAUCUACAAUAGGAAGGCGGCGGAUUUGGUGCUGGGCCA<br>CAGCUGCGACGCGUCU <sup>UCC</sup> AGACUCAU <sup>UAU</sup> AGGGUUUCCUGA<br>UACGAGUUCUGUUGACAUCACUUCUGAAACGGGUGUCUGGCC<br>AUCACGGCCCUGAGCUGUAGUUCU <sup>UAA</sup> UGCAAUGUCACGGUC<br>AGUCAGCAU <sup>UCCU</sup> UUUAAAACACCUUGCUCUACAACGGGGAU<br>CGCCCCGACGUUAUGCUGUUUCAU <sup>UAG</sup> AGAAGCCGCU <sup>UCC</sup> UG<br>AAUCGUUUGAUU <sup>CGG</sup> AGAAACGGUUGCCACCUGCGUUGUCAU<br>UGUAUCUUUAA <sup>CUG</sup> AACUCAUUGUCAGCACCCCUU <sup>CAU</sup> CAUCA<br>UUAGUAUGUUCAGACACGAGCCG                                            |
| IS-501                         | ACAGGCUAACAUUUGCUGUAACCUCUGUCUCUACUUUUACCC<br>GUUCUGUUCUUGCGACAAGCUGCAGGGCGCUGUCAAGCAAG<br>CUGCAUAACCUGCUGCAAACAGCUGCUCUGGAUUUGUCGCUU<br>UUUCUAAUUUCUUGGCUCUCGGUGUCCCCGGCAUUGCGACAU<br>CAAGCUCAAGAACGCGGUCUGAUGAAU <sup>GACCU</sup> UUCUUCUC<br>U <sup>UCCU</sup> CCUACCUGCAAACAGUUGCGGUAAAUAAUGGCUGAC<br>UCAUUUUUCAU <sup>UCCCC</sup> AAUAAUUUUUAUACA <u>UUAAU</u> UGUA<br>CACAAUUAAAUUGAAAUGUCAUUUUUCGCGUAUAAAAAGC<br>UUAUCUCGUAAUGAGAUAAAGCUUUUUCAUUGAACAUUACCCC<br>GCUAUUCACGGAUUUGCCCAGU <sup>UCCU</sup> UAAUGAUGUAUUUUG<br>UAGAAGUCAGUGCAGGAAGCCCCAUCGGUCCUCUUGCAUGAA<br>GCUUUUGCGUGCUGAUGCCGAUUUCGGCUCCGUAGCC |
| DNA templates                  | sequence (5'–3') (with T7 promoter region underlined)                                                                                                                                                                                                                                                                                                                                                                                                                                                                                                                                                                |
| 113 nt model RNA               | TAATACGACTCACTATTAGATCACAGAGATGTGATGGAAAATAG<br>TTGATGAGTTGTTTAAATTTTAAGAATTTTATCTTAATTAAGGAAG<br>GAGTGATTTCAATGGCACAAGATATCATTTCAACAATCGG                                                                                                                                                                                                                                                                                                                                                                                                                                                                           |
| 113 nt model RNA probe (86mer) | TAATACGACTCACTATTATTGAAATCACTCCTTCCTTAATTAAGA<br>TAAAAATTCTTAAATTTAAACAACCTCATCAACTATTTTCCATCACA<br>TCTCTGTGATCT                                                                                                                                                                                                                                                                                                                                                                                                                                                                                                     |
| E. coli 5S rRNA probe (60mer)  | CAGTAATACGACTCACTATAGGCGCTACGGCGTTTCACTTCTGA<br>GTTTCGGCATGGGGTCAGGTGGGACCACCGCGCTACG                                                                                                                                                                                                                                                                                                                                                                                                                                                                                                                                |
| E. coli 16S rRNA probe (60mer) | CAGTAATACGACTCACTATAGGCGTGGACTACCAGGGTATCTAA<br>TCCTGTTTGCTCCCCACGCTTTCGCACCTGAGCGTC                                                                                                                                                                                                                                                                                                                                                                                                                                                                                                                                 |

|                                |                                                                                                                                                                                                                                                                                                                                                           |
|--------------------------------|-----------------------------------------------------------------------------------------------------------------------------------------------------------------------------------------------------------------------------------------------------------------------------------------------------------------------------------------------------------|
| E. coli 23S rRNA probe (60mer) | CAGTAATACGACTCACTATAGGCACCATTTTGCCTAGTTCCTTC<br>ACCCGAGTTCTCTCAAGCGCCTTGGTATTCTCTACC                                                                                                                                                                                                                                                                      |
| IS-036 (=36 nt model RNA)      | CAGTAATACGACTCACTATTACTGACTTGAACGCGATTCTTTATC<br>AGCGCGATAAC                                                                                                                                                                                                                                                                                              |
| IS-051                         | TAATACGACTCACTATTACGTACGCTCCGACACTTGGAGTACTC<br>GGCGCTGTAATCGGGCTGATTGCC                                                                                                                                                                                                                                                                                  |
| IS-060                         | TAATACGACTCACTATTATCGAAGAGCCAGTTGCAGCCGCCATC<br>GGAGCGGATTTACCGGTTGATGAGCCGGTTGCC                                                                                                                                                                                                                                                                         |
| IS-102A                        | TAATACGACTCACTATTATCAAGCAATCCGCCGATAATCGCGAC<br>ATCTGTGCCGTGGCCCTTATACGTTTCCGCAAACGAGCCGTAAA<br>AAGATACAATGATGCGCTCAGGCTCTCTGCC                                                                                                                                                                                                                           |
| IS-102B                        | TAATACGACTCACTATTACAGTCTGGATGTTTACGCCAACATCG<br>ACGGTTACCTCACTGATACGCTCAGCCATATTTTTGAAGAAGCA<br>ATCGGATTTGCGGGCTGTGAGCTGATACGAC                                                                                                                                                                                                                           |
| IS-122                         | TAATACGACTCACTATTAGATGACCTGCTCCCCAGTCTCTGGAT<br>GTCTGCCGTTCAATGCGAATACAGATCCGATTTTCGCTAAATCC<br>AAGCTGTTTCATCTCAATCGCGCATTGCTTCGTATATAAATCCATT<br>ACTGCC                                                                                                                                                                                                  |
| IS-149                         | TAATACGACTCACTATTACTGCAGGAGCGAGGCGTCTCGCTGC<br>CTGAAAGACTTCTTCTATTGTCTCGCTCGACGTAAATTCAGTAAT<br>TTGCCAATAAGCAACAGGTGCATCGATACTGCCTGCGATCGACT<br>TCACTAACGTCGTCTTTCCGTTTCCAGGAGGTCC                                                                                                                                                                        |
| IS-200                         | TAATACGACTCACTATTACCTGGACCAGAAGTTTGAGCTCATCA<br>AAATTTGCCCCGCTTATCCACTGGACATGGGATGACGTTTGGACG<br>TACATCCGCCTGCACAATTTGCCTTATAACAACTGCACGATCA<br>ACATTATCCGAGCATAGGCTGTGAAATGTGTACACTGCCTTCCC<br>CGGACCCGAACGATGAGAGGGCTGGAAGATGGGCCGGACGG                                                                                                                 |
| IS-250                         | TAATACGACTCACTATTATGAATGCCGGGCGGCTGTTTCCGCGT<br>CACGGCTTTGAAGCTGGCGGTCTCTAATAACAGAAAGAGGCAG<br>AAACGTCGCCCCGGCCGAAGGAATTCTGCTTTAAATATTGAATCG<br>CTTTGCGGGCAGATTGTTTCATCGTCGGTCACGACGTGTTGAGC<br>AGAAGCGCCGAGCGCTATTTCAATGGCCGTTTCATACTTCTGTT<br>CTGTAGAAATCAGCTCAAGAACCGCTCCGCGAATTCGCCAAG<br>GCGCTC                                                      |
| IS-301                         | TAATACGACTCACTATTATGCATCCATAAACGAATTGGCTGCCG<br>CATAATCGGCTTGTCCAGCGTTTCTAAACATCCCGAAACAGAA<br>GAGAAGAAAATGAAAAAGTCCAATGGGAAATCCTTGCTGCATTC<br>GTCTACATGTAACAACCCGCTCACTTTTGGCTGCAACACTTCTT<br>GAAACTCTTCATTCTGTTTTATGAATGATGAAGCGATCTTTACTGC<br>TGCCTGCACCGTGAATAATTCCATTGAGAGTGCCATATCTTTCT<br>TTGATTTCTCCAAAAGATGACGAACCGCATGCTGATCACTTAC<br>ATCAGCCTC |
| IS-351                         | TAATACGACTCACTATTAGACCTCTTGTCCCGCCTGTAATAAGC<br>AGGACTTTGTCTGTTGAAAACGATACTTGCTTATGACTTAGAGC<br>GGCTTCTGCTGGCTGCTCTGTCAAATATGCGCGATATCGCTGTC<br>CGTTTCGATAACAGACTTCTGATTCTGTGCTCTTGGCATAATATT<br>CAACTGCAATCAGTCTGGCCAGCTCCTCATGAGAGGCTTCGCA<br>TTCCATATCTGCATGTCTTGAAGTAAGATGGCTGTACTCACTTTG<br>AAGCATGCGGTATAAACCGGCCCGTGAAGCACCAGACAAAAGA              |

|                                       |                                                                                                                                                                                                                                                                                                                                                                                                                                                                                                                                                                                      |
|---------------------------------------|--------------------------------------------------------------------------------------------------------------------------------------------------------------------------------------------------------------------------------------------------------------------------------------------------------------------------------------------------------------------------------------------------------------------------------------------------------------------------------------------------------------------------------------------------------------------------------------|
|                                       | ACACCCTCATTTGCGTAGGCCTCCAGCCCCTTTGTTACACCCAA<br>GACCGTCAAATGATGC                                                                                                                                                                                                                                                                                                                                                                                                                                                                                                                     |
| IS-400                                | TAATACGACTCACTATTACTGCCAGGTCTCCAAGCGCAACGATC<br>CCGACTAGATTGTTTTGATCTACAATAGGAAGGCGGCGGATTG<br>GTGCTGGGCCATCAGCTGCGACGCGTCTTCCAGACTCATATTA<br>GGGTTTCCTGATACGAGTTCTGTTGACATCACTTCTGAAACGGG<br>TGTCTGGCCATCACGGCCCTGAGCTGTAGTTCTTAATGCAATGT<br>CACGGTCAGTCAGCATTCTTTTAAAAACACCTTGCTCTACAACG<br>GGGATCGCCCCGACGTTATGCTGTTTCATTAGAGAAGCCGCTT<br>CCTGAATCGTTTGATTTCGGAGAAACGGTTGCCACCTGCGTTGTC<br>ATTGTATCTTTAACTGAACCTATTGTCAGCACCCCTTTCAATCAT<br>TAGTATGTTTCAGACACGAGCCG                                                                                                               |
| IS-501                                | TAATACGACTCACTATTACAGGCTAACATTTGCTGTAACCTCTGT<br>CTCTACTTTTACCCGTTCTGTTCTTGCGACAAGCTGCAGGGCGC<br>TGTCAAAGCAAGCTGCATAACCTGCTGCAAACAGCTGCTCTGG<br>ATTTGTCGCTTTTTCTAATTTCTTGGCTCTCGGTGTCCCCGGCAT<br>TGCGACATCAAGCTCAAGAACGCGGTCTGATGAAATGACCTTTC<br>CTTCTCTTCCTCCTACCGCTGAAACAGTTGCGGTAAATAATGGC<br>TGACTCATTTTTTCATTCCCCCAATATATTTTATACAATTAAATTGT<br>ACACAATTAAATTTGAAATGTCAATTTTTTCGCGTATAAAAAAGCT<br>TATCTCGTAATGAGATAAGCTTTTTTCATTGAACATTACCCCGCTA<br>TTCACGGATTTGCCAGTTCCTTTAATGATGTATTTTGTAGAAGT<br>CAGTGCAGGAAGCCCCATCGGTCCTCTTGATGAAGCTTTTGC<br>GTGCTGATGCCGATTTTCGGCTCCGTAGCC |
| <b>primers</b>                        | <b>sequence (5'–3') (with T7 promoter region underlined)</b>                                                                                                                                                                                                                                                                                                                                                                                                                                                                                                                         |
| RTp2, reverse<br>transcription primer | CAGACGTGTGCTCTTCCGAT                                                                                                                                                                                                                                                                                                                                                                                                                                                                                                                                                                 |
| 113 nt model<br>RNA_fwd               | TAATACGACTCACTATTAGATCACAGAGATGTGATGGAAAATAG<br>TTGATG                                                                                                                                                                                                                                                                                                                                                                                                                                                                                                                               |
| 113 nt model<br>RNA_middle strand     | GGAAAATAGTTGATGAGTTGTTTAATTTTAAGAATTTTATCTTAA<br>TTAAGGAAGGAGTGATTTCAATGG                                                                                                                                                                                                                                                                                                                                                                                                                                                                                                            |
| 113 nt model<br>RNA_rev               | CCGATTGTTGAAATGATATCTTGTGCCATTGAAATCACTC                                                                                                                                                                                                                                                                                                                                                                                                                                                                                                                                             |
| 113 nt model RNA<br>probe_fwd         | TAATACGACTCACTATTATTGAAATCACTCCTTCCTTAATTAAGA<br>TAAAAATTCTTAAAA                                                                                                                                                                                                                                                                                                                                                                                                                                                                                                                     |
| 113 nt model RNA<br>probe_rev         | AGATCACAGAGATGTGATGGAAAATAGTTGATGAGTTGTTTAAT<br>TTTAAGAATTTTATC                                                                                                                                                                                                                                                                                                                                                                                                                                                                                                                      |
| E. coli 5S rRNA<br>probe_fwd          | CAGTAATACGACTCACTATAGGCGCTACGGCGTTTCACTTCTGA<br>GTTCCG                                                                                                                                                                                                                                                                                                                                                                                                                                                                                                                               |
| E. coli 5S rRNA<br>probe_rev          | CGTAGCGCGGTGGTCCCACCTGACCCCATGCCGAACCTCAGAAG<br>TGAAAC                                                                                                                                                                                                                                                                                                                                                                                                                                                                                                                               |
| E. coli 16S rRNA<br>probe_fwd         | CAGTAATACGACTCACTATAGGCGTGGACTACCAGGGTATCTAA<br>TCCTG                                                                                                                                                                                                                                                                                                                                                                                                                                                                                                                                |
| E. coli 16S rRNA<br>probe_rev         | GACGCTCAGGTGCGAAAGCGTGGGGAGCAAACAGGATTAGATA<br>CCCTGG                                                                                                                                                                                                                                                                                                                                                                                                                                                                                                                                |
| E. coli 23S rRNA<br>probe_fwd         | CAGTAATACGACTCACTATAGGCACCATTTTGCCTAGTTCCTTC<br>ACCCG                                                                                                                                                                                                                                                                                                                                                                                                                                                                                                                                |

|                            |                                                             |
|----------------------------|-------------------------------------------------------------|
| E. coli 23S rRNA probe_rev | GGTAGAGAATACCAAGGCGCTTGAGAGAACTCGGGTGAAGGAACTAGG            |
| IS-036_fwd                 | CAGTAATACGACTCACTATTACTGACTTGAACGCGATTCTTTATCAGCGCGATAAC    |
| IS-036_rev                 | GTTATCGCGCTGATAAAGAATCGCGTTCAAGTCAGTAATAGTGA GTCGTATTACTG   |
| IS-051_fwd                 | TAATACGACTCACTATTACGTACGCTCCGACACTTGG                       |
| IS-051_rev                 | GGCAATCAGCCCGATTACAG                                        |
| IS-060_fwd                 | TAATACGACTCACTATTATCGAAGAGCCAGTTGCAGC                       |
| IS-060_rev                 | GGCAACCGGCTCATCAACC                                         |
| IS-102A_fwd                | TAATACGACTCACTATTATCAAGCAATCCGCCG                           |
| IS-102A_rev                | GGCAGAGAGCCTGAGCG                                           |
| IS-102B_fwd                | TAATACGACTCACTATTACAGTCTGGATGTTTACG                         |
| IS-102B_rev                | GTCGTATCAGCTCACAG                                           |
| IS-122_fwd                 | TAATACGACTCACTATTAGATGACCTGCTCCCCAG                         |
| IS-122_rev                 | CGTATATAAATCCATTACTGCCAAGC                                  |
| IS-149_fwd                 | TAATACGACTCACTATTACTGCAGGAGCGAG                             |
| IS-149_rev                 | GGACCTCCTGGAAACG                                            |
| IS-200_fwd                 | TAATACGACTCACTATTACCTGGACCAGAAGTTTGAGC                      |
| IS-200_rev                 | CCGTCCGGCCCATCTTCC                                          |
| IS-250_fwd                 | TAATACGACTCACTATTATGAATGCCGGGCGGCTG                         |
| IS-250_rev                 | GAGCGCCTTGGCGGAATTCG                                        |
| IS-301_fwd                 | TAATACGACTCACTATTATGCATCCATAAACGAATTGG                      |
| IS-301_rev                 | GAGGCTGATGTAAGTGATCAG                                       |
| IS-351_fwd                 | TAATACGACTCACTATTAGACCTCTTGTCCCGCCTG                        |
| IS-351_rev                 | GCATCATTTGACGGTCTTGG                                        |
| IS-400_fwd                 | TAATACGACTCACTATTACTGCCAGGTCTCCAAGC                         |
| IS-400_rev                 | CGGCTCGTGTCTGAACATAC                                        |
| IS-501_fwd                 | TAATACGACTCACTATTACAGGCTAACATTTGCTG                         |
| IS-501_rev                 | GGCTACGGAGCCGAAATCGG                                        |
| <b>DNA adapters</b>        | <b>sequence (5'–3') (with 4-letter barcodes underlined)</b> |
| AD3-id4-bc01               | /5Phos/CNNNNNNACTTGAAGATCGGAAGAGCACACGTCTG/3Sp C3/          |
| AD3-id4-bc02               | /5Phos/CNNNNNNACGCTGAGATCGGAAGAGCACACGTCTG/3Sp C3/          |
| AD3-id4-bc03               | /5Phos/CNNNNNNACCGGTAGATCGGAAGAGCACACGTCTG/3Sp C3/          |

|                         |                                                   |
|-------------------------|---------------------------------------------------|
| AD3-id4-bc04            | /5Phos/CNNNNNNACTCATAGATCGGAAGAGCACACGTCTG/3SpC3/ |
| AD3-id4-bc05            | /5Phos/CNNNNNNACGAACAGATCGGAAGAGCACACGTCTG/3SpC3/ |
| AD3-id4-bc06            | /5Phos/CNNNNNNACAGCAAGATCGGAAGAGCACACGTCTG/3SpC3/ |
| AD3-id4-bc07            | /5Phos/CNNNNNNACCATAAGATCGGAAGAGCACACGTCTG/3SpC3/ |
| AD3-id4-bc08            | /5Phos/CNNNNNNACATAGAGATCGGAAGAGCACACGTCTG/3SpC3/ |
| AD3-id4-bc09            | /5Phos/CNNNNNNACTGTCAGATCGGAAGAGCACACGTCTG/3SpC3/ |
| AD3-id4-bc10            | /5Phos/CNNNNNNACGTCTAGATCGGAAGAGCACACGTCTG/3SpC3/ |
| AD3-id4-bc11            | /5Phos/CNNNNNNACACGCAGATCGGAAGAGCACACGTCTG/3SpC3/ |
| AD3-id4-bc12            | /5Phos/CNNNNNNACTACGAGATCGGAAGAGCACACGTCTG/3SpC3/ |
| cDNA anchor (sense)     | /5Phos/CAGATCGGAAGAGCGTCGTGT/3SpC3/               |
| cDNA anchor (antisense) | ACACGACGCTCTTCCGATCTGGG                           |

## Supplementary Methods:

**General methods.** All water used for the work highlighted was ddH<sub>2</sub>O grade, and additionally filtered through a MilliQ system (mQ). If not stated otherwise, chemicals, solvents, commercial buffers, nucleic acids, enzymes, *et cetera*, were used without further purification. Chemicals, stock solutions and commercial buffers were purchased from Acros Organics, Alfa Aesar, Applichem, Carl Roth, Grüssing, Honeywell Riedel-de Haën, Invitrogen, New England Biolabs, Rapidozym, Sigma-Aldrich (Merck), Thermo Fisher Scientific, VWR. Non-commercial buffers were mixed from its components and H<sub>2</sub>O according to the composition and sterile-filtered using a 0.22 µm bottle-top filter. Moisture-sensitive chemical reactions were performed using anhydrous solvents and reagents, and under argon atmosphere using the Schlenk technique. Thin-layer chromatography (TLC) was performed using POLYGRAM SIL G UV254 polyester sheets as stationary phase, and product, reactant or reagent spots were visualized using a UV lamp. Oligonucleotide primers, (radioactive) nucleotides and cofactor derivatives were purchased from Hartmann Analytic, Integrated DNA Technologies, Rapidozym, Sigma-Aldrich (Merck), Thermo Fisher Scientific. Enzymes and enzyme mixes were purchased from Bio-Rad Laboratories, Invitrogen, New England Biolabs, Roche, Thermo Fisher Scientific. ADPRC enzyme was kindly provided by Dr. Yaqing Zhang (Jäschke Lab, IPMB, University of Heidelberg). Commercial kits for oligonucleotide preparation and analysis were purchased from Agilent Technologies, Cell Signaling Technology, Invitrogen, QIAGEN. Stocks containing oligonucleotides and enzymes were generally stored at -20 °C (or -80 °C for the aliquots of mixed internal RNA standards). Reaction mixes were generally prepared in the following order: Water, reagents, reactants, oligonucleotides, enzymes. Lyophilization of products was performed from aqueous solution or water/acetonitrile mixtures after freezing in suitable containers using liquid nitrogen. Work with [<sup>32</sup>P]-labeled, radioactive nucleotides and RNA species was performed behind protective Plexiglas screens and following the applicable safety regulations in a dedicated isotope lab. Nuclear magnetic resonance (NMR) spectroscopy was conducted with a Mercury plus 300 MHz or 500 MHz spectrometer. Analytes were dissolved in suitable deuterated solvents from Eurisotop. In general, recorded spectra involved <sup>1</sup>H- and <sup>13</sup>C-NMR experiments (<sup>13</sup>C-NMR spectra with attached-proton test (APT)). Where applicable, <sup>31</sup>P-, COSY-, HSQC-, and HMBC-NMR spectra were recorded (data not shown). Chemical shifts δ were reported in the reference to the deuterated solvent and are generally given in the format »chemical shift [ppm] (multiplicity, coupling constant [Hz], atom count)«. The signal multiplicity was abbreviated as s = singlet, d = doublet, t = triplet, q = quartet, quin = quintet, and m = multiplet. The analysis of recorded spectra was performed using the MestReNova software. Mass spectrometry (MS) measurements were conducted on a Bruker micrOTOF QII system using electrospray ionization (ESI) in positive or negative mode. High-resolution mass spectrometry (HR-MS) was performed using ESI-L Low-Concentration Tuning Mix as a calibrant. UV-Vis spectroscopy for small molecules, nucleic acids, and peptides was performed with the Nanodrop One device using 1 µL of solution and the respective measurement program recommended by the manufacturer. OD<sub>600</sub> measurements for bacterial cultures were performed on the BioPhotometer 6131 with suitable cuvettes using 1 mL of solution according to the manufacturer's instructions. Fluorescence spectroscopy measurements for DNA or RNA oligonucleotides were performed with a Qubit fluorometer 2.0 device using either the Qubit dsDNA Quantification Assay Kit (High Sensitivity) or the Qubit RNA High Sensitivity (HS) Assay Kit according to the manufacturer's instructions. High-performance liquid chromatography (HPLC) was generally performed with two setups: For analytical HPLC, either the Luna 5u C18(2) 100 Å (250 × 4.6 mm) or the VDSpher PUR 100 C18-SE 5u (250 × 4.6 mm) column was used as stationary phase. For semi-preparative HPLC, the Luna 5u C18(2) 100 Å (250 × 15 mm) column was used as stationary phase. The mobile phase typically either was a mixture of H<sub>2</sub>O (mQ) and acetonitrile (ACN), or a buffer mixture consisting of buffer A (0.1 M triethylamine/acetic acid in water, pH 7.0) and buffer B (0.1 M triethylamine/acetic acid in

acetonitrile/water 4:1, pH 7.0). The flow-rate generally was set to 1 mL/min for analytical HPLC and 5 mL/min for semi-preparative HPLC. Chromatograms were typically recorded at 260 nm (absorption), and other suitable wavelengths. Analysis of the peak area was performed using the ChemStation software, all other analyses, base-line correction, and plotting were done using the OriginPro software. Automated electrophoresis for DNA libraries obtained after HELIOS NAD-Seq was performed on a 2100 Bioanalyzer device in combination with the Bioanalyzer High Sensitivity DNA Analysis Kit according to the manufacturer's instructions. Denaturing polyacrylamide (PA) gels were prepared using Rotiphorese Sequencing gel concentrate (25%), which was diluted with TBE buffer and a saturated urea concentrate. Native PA gels were prepared using Rotiphorese NF-Acrylamide/Bis-solution (30%), which was diluted with TBE buffer. Denaturing and native PA gel electrophoresis (PAGE) was performed in 1x TBE buffer at a constant power of 17 W (gel size 24x18 cm) or a constant voltage of 150 V (gel size 8.3x7.0 cm). 0.4% APB–5% PA gels were prepared using the required amount of solid acryloylaminophenyl boronic acid (APB) and Rotiphorese NF-Acrylamide/Bis-solution (30%), which was diluted with TAE buffer. APB-PA gel electrophoresis (APB-PAGE) was performed in 1x TAE buffer at a constant voltage between 150 V and 180 V (gel size 8.3x7.0 cm). Nucleic acids were stained with SYBR Gold and visualized on a Typhoon FLA 9500 device. Agarose gels were prepared using agarose (1–2% (w/v)) in 1x TBE buffer, and gel electrophoresis was performed in 1x TBE buffer at a constant voltage (120 V) for typically 25–40 min. Nucleic acids were stained with ethidium bromide (EtBr) and visualized on a Typhoon FLA 9500 device, or the gel was further used for application of the Northern blotting technique. Signal intensities from gel electrophoresis or Northern blot experiments were determined using the ImageQuant software.

**PCR for DNA template generation.** PCR amplification reactions for template generation (e.g. for IVT reactions) were generally performed using either Taq DNA polymerase or Q5 DNA polymerase, with a variable amount of template DNA (dsDNA, gDNA, plasmid, ssDNA with overlap to both forward and reverse primers). Taq DNA polymerase-based PCR amplifications for RNAI and RNAIII leader templates, as well as RNA probe templates, were performed in the presence of 0.2 mM of each dNTP (dATP, dCTP, dGTP, dTTP), 2  $\mu$ M of gene-specific forward and reverse primer, 1x GenTherm buffer, 3.4 mM MgCl<sub>2</sub>, 2% DMSO, and 10 ng/ $\mu$ L Taq DNA polymerase. Denaturation was performed at 94 °C, annealing at typically 55–58 °C, and extension at 72 °C for 1 min, 1 min, and 30 s, respectively. Q5 DNA polymerase-based PCR amplifications for internal RNA standard templates were performed in the presence of 0.2 mM of each dNTP (dATP, dCTP, dGTP, dTTP), 0.2  $\mu$ M of gene-specific forward and reverse primer, 1x Q5 reaction buffer, and 0.02 U/ $\mu$ L Q5 high-fidelity DNA polymerase. Denaturation was performed at 98 °C, annealing at typically 61–68 °C, and extension at 72 °C for 10 s, 20 s, and 30 s, respectively. Generally, 35 amplification cycles were performed using a thermocycler device. The information from the manufacturer (Integrated DNA Technologies) as well as the NEB Tm Calculator web tool were consulted to determine the primer annealing temperature. The amplified DNA templates were purified using the QIAquick PCR Purification Kit according to the manufacturer's instructions, followed by elution with H<sub>2</sub>O, concentration determination by UV-Vis spectroscopy using a Nanodrop device, and analysis by agarose gel electrophoresis.

***In vitro* transcription (IVT).** *In vitro* transcriptions for pppRNAs were generally performed in the presence of varying amounts of DNA template, 2 mM ATP, 2 mM CTP, 2 mM GTP, 2 mM UTP, 40 mM Tris-HCl (pH 8.1), 1 mM spermidine, 22 mM MgCl<sub>2</sub>, 0.01% Triton-X-100, 10 mM DTT, 5% DMSO, and 0.1  $\mu$ g/ $\mu$ L T7 RNA polymerase, and incubated at 37 °C for 3.5 h. By adding 4 mM NAD<sup>+</sup> and reducing the concentration of ATP to 1 mM, mixtures of NAD-capped RNAs and corresponding pppRNAs were obtained. After the full reaction time, 2  $\mu$ L of DNase I (1  $\mu$ g/ $\mu$ L stock) per 100  $\mu$ L of reaction volume were added and the incubation continued for 30

min at 37 °C. RNA was typically purified by denaturing 10% PAGE, followed by excision of the band of interest, gel crushing, overnight elution (20 °C, 700 rpm shaking) in 0.3 M NaOAc (pH 5.5), removal of gel pieces using 50 mL filter falcon tubes, and recovery by isopropanol precipitation. After this, the concentration of the aqueous RNA stock was determined by UV-Vis spectroscopy using a Nanodrop device, and the stock solution was stored at -20 °C. To obtain pure NAD-capped RNA, additional purification by 0.4% APB–5% PA gel electrophoresis was performed, followed by RNA visualization after incubation with SYBR Gold using a Typhoon FLA 9500 device, excision of the band of interest, and elution following two main routes: For RNA longer than 125 nt, the gel band was crushed, followed by overnight elution (20 °C, 700 rpm shaking) in 0.3 M NaOAc (pH 5.5), removal of gel pieces using 50 mL filter falcon tubes, and recovery by isopropanol precipitation (see chapter 19.4). For shorter RNAs, the above described method was also mainly used, however, in some cases, an in-house method was applied. In said procedure for electroelution, the excised band was pushed into the wells of an agarose gel (containing two drops EtBr, see chapter 18.8), and while performing agarose gel electrophoresis, the travelling RNA band was followed with an Alphamager device until it has run into a large well (about 3–5 cm after the regular wells in the direction of RNA travelling) filled with 1x TBE. Once the RNA has visibly entered the pool, the buffer inside the well was removed, brought to a final concentration of 0.3 M NaOAc (pH 5.5) using a 3 M stock, and the purified RNA was recovered by isopropanol precipitation.

***In vitro* transcription (IVT) for radioactively labeled RNA.** Radioactively labeled RNA probes were prepared accordingly to the procedures described above. The *in vitro* transcription reaction was performed in the additional presence of typically 1 µCi/µL α-[<sup>32</sup>P]-CTP (optionally also α-[<sup>32</sup>P]-ATP and α-[<sup>32</sup>P]-UTP were used in addition to α-[<sup>32</sup>P]-CTP, but the sum of radioactive nucleotide triphosphates was kept at 1 µCi/µL). RNA probes were typically purified by extractions with P/C/I (three times) and diethyl ether (twice), followed by removal of ether traces in an Eppendorf concentrator, and recovery by ethanol precipitation.

**Vaccinia capping of pppRNA.** For the m<sup>7</sup>G-capping reaction of pppRNA, the NEB Vaccinia Capping System was used according to the manufacturer's instruction. First, a 2 mM S-adenosylmethionine (SAM) solution was freshly diluted from the contained 32 mM stock. Then, around 2.2 µg of pppRNA in a volume of 15 µL were incubated at 65 °C for 5 min, cooled down on ice, and mixed with 2 µL 10x capping buffer, 1 µL GTP stock, 1 µL SAM (2 mM), and 1 µL Vaccinia capping enzyme. The G-capping of pppRNA was performed following the same method, while excluding SAM from the reaction mixture. The total volume of 20 µL was incubated at 37 °C for 30 min, before the reaction was stopped by the addition of 20 µL 2x APB loading buffer. To obtain pure m<sup>7</sup>G-capped RNA, purification by 0.4% APB–5% PA gel electrophoresis was performed, followed by RNA visualization after incubation with SYBR Gold, excision of the band of interest, and elution as described above for the purification of NAD-capped RNAs.

**Recovery of RNA or DNA oligonucleotides by precipitation.** Nucleic acid-containing, aqueous solutions were mixed with NaOAc (3 M, pH 5.5) to reach a resulting sodium acetate concentration of 0.3 M. For low amounts of nucleic acids (regularly < 1 µg), 1 µL of RNA-grade glycogen was added, followed by gentle shaking and incubation at room temperature for about 1 min. In a next step, either 1 volume of cold isopropanol (only for RNA) or 2.5 volumes of cold absolute ethanol (for both, RNA and DNA), both at -20 °C, were added to the nucleic acid-containing solution. The vessel was inverted between 5 and 10 times, and standardly stored at -20 °C for between 1 h and 3 days. The precipitated nucleic acids were centrifuged (~15000 g, 4 °C) for at least 60 min (DNA) or 90 min (RNA). The supernatant was removed and the formed pellet was washed twice with 70% aqueous ethanol solution (at -20 °C), each wash followed by centrifugation (~15000 g, ~10 min, 4 °C) and removal of the supernatant. Residual solvent was removed in an Eppendorf concentrator (~3 min), before the pellet was dissolved



in H<sub>2</sub>O. The nucleic acid concentration of the recovered sample was determined by UV-Vis spectroscopy.

**Pre-adenylation of 3'-adapters.** For the pre-adenylation of different 3'-adapters, 5'-phosphorylated and 3'-blocked (C3-spacer) oligonucleotides were ordered from Integrated DNA Technologies. From the dried down oligonucleotides, stock solutions of 800  $\mu$ M were prepared with H<sub>2</sub>O (mQ), from which 100  $\mu$ L were used per adenylation reaction. Those 100  $\mu$ L solutions were either dried using an Eppendorf concentrator device or further used without solvent removal, and the oligonucleotides (80 nmol) were adenylated in a total volume of 200  $\mu$ L in the presence of 100 mM ImpA and 50 mM MgCl<sub>2</sub> at 50 °C for 90 min. After this reaction time, another increment (200  $\mu$ L) containing 100 mM ImpA and 50 mM MgCl<sub>2</sub> was added, and the incubation continued at 50 °C for 90 min. The reaction mixture was purified on Illustra NAP-5 columns according to the manufacturer's instructions and fractions of 2 drops (around 100  $\mu$ L) taken, which were analyzed using a Nanodrop device. Fractions with ratios of  $A_{260}/A_{280} < 2.0$  and  $A_{260}/A_{230} < 2.4$  were combined as DNA adapter-containing fractions, and the adapter adenylation ratio was determined by 20% denaturing PAGE. Stocks with final concentration of 50  $\mu$ M of pre-adenylated adapter (100  $\mu$ M total oligonucleotide concentration) were prepared either by diluting or concentrating the combined solutions, and stored at -20 °C.

**Cell cultivation and RNA extractions.** Total RNA from *E. coli* cells was extracted using a hot phenol extraction. *E. coli* K12 JM109 cultures were grown in LB medium till OD  $\approx$  2.0, the solvent was removed by centrifugation and the cell pellets frozen at -80 °C. Then, 4 mL of an aqueous solution containing SDS (2% (w/v)) and EDTA (4 mM), which was previously heated to 95 °C, were added. After suspending by pipetting and mixing on a vortex mixer for 30 s, the suspension was incubated at 95 °C with shaking at 750 rpm for 3 min, with vortex mixing after every minute. This mixture was pipetted into 8 mL aqueous phenol, which was previously heated to 65 °C, in a 15 mL falcon. The suspension was mixed on a vortex mixer for 30 s, and incubated at 65 °C for 5 min, with vortex mixing after every minute. The mixture was centrifuged (15000 g, typically around 15 min, 20 °C) until phase separation, and the aqueous layer transferred into a new 15 mL falcon tube without disturbing the interphase. This was followed by extraction with equal volumes of P/C/I solution (four times) and diethyl ether (twice), each followed by centrifugation (10000 g, 5 min, 20 °C), and removal of ether traces in an Eppendorf concentrator. After this procedure, around 1 mL was left for every sample and the extracted total RNA was recovered by ethanol precipitation (overnight). The concentration of the obtained nucleic acid samples was measured by UV-Vis spectroscopy, and, to remove DNA contamination, the total RNA sample was treated with 1x DNase I buffer and DNase I (0.5 U per 1  $\mu$ g of RNA) at 37 °C for 45 min, followed by extractions with P/C/I (three times) and diethyl ether (twice), removal of ether traces in an Eppendorf concentrator, ethanol precipitation to recover total RNA, and analysis by 1% agarose gel electrophoresis.

**List of Non-Commercial Buffers.** ADPRC buffer with EDTA (5x): Na-HEPES (250 mM, pH 7.0), EDTA (25 mM). ADPRC buffer with MgCl<sub>2</sub> (5x): Na-HEPES (250 mM, pH 7.0), MgCl<sub>2</sub> (25 mM). ADPRC storage buffer (1x): 0.5x ADPRC buffer with MgCl<sub>2</sub>, glycerol (50% (v/v)). Agarose gel electrophoresis loading dye (6x): Glycerol (30% (v/v)), bromophenol blue (0.1% (w/v)), xylene cyanol (0.1% (w/v)). APB-PAGE loading buffer (2x): 2x TAE buffer, urea (8 M), optionally with bromophenol blue and xylene cyanol dye. Buffer A (for HPLC): 0.1 M triethylamine/acetic acid in water, pH 7.0. Buffer B (for HPLC): 0.1 M triethylamine/acetic acid in acetonitrile/water 4:1, pH 7.0. High-Salt Wash buffer (1x)(50): Tris-HCl (20 mM, pH 7.4), NaCl (1 M). Immobilization Buffer (2x): Na-HEPES (20 mM, pH 7.2), NaCl (2 M), EDTA (10 mM). IVT buffer (10x): Tris-HCl (400 mM, pH 8.1), spermidine (10 mM), MgCl<sub>2</sub> (220 mM), Triton-X-100 (0.1%). Low-Salt Wash buffer (1x)(50): Tris-HCl (20 mM, pH 7.4), NaCl (0.1 M). NaOAc stock (for nucleic acid precipitation or gel elution): NaOAc (3 M, pH 5.5). Native PAGE loading buffer (2x): 2x TBE buffer, glycerol (50% (v/v)), optionally with bromophenol blue and xylene cyanol dye. Northern Blot Wash Solution 1: SSC buffer (2x), 0.1% SDS. Northern Blot Wash Solution 2: SSC buffer (0.25x), 0.1% SDS. PAGE loading buffer (2x): 2x TBE buffer,

formamide (80% (v/v)), optionally with bromophenol blue and xylene cyanol dye. Streptavidin Wash buffer (1x) – high urea: Tris-HCl (50 mM, pH 7.4), urea (8 M). Streptavidin Wash Buffer (1x) – low urea: Tris-HCl (50 mM, pH 7.4), urea (1 M). TAE buffer (50x): Tris-acetate (2 M, pH 8.0), EDTA (50 mM). TBE buffer (10x): Tris-borate (1 M, pH 8.3), EDTA (20 mM). TBS buffer (10x): Tris-HCl (100 mM, pH 7.4), NaCl (1.5 M). TBS-T buffer (1x): 1x TBS buffer, Tween 20 (0.5% (v/v)).

### **Chemical synthesis:**

**Biotin-NHS ester.** Anhydrous DMF (25.0 mL) was heated to 65 °C in a Schlenk flask under argon atmosphere. Biotin (750.0 mg, 3.07 mmol) was dissolved in the hot DMF and, after full dissolution, *N*-hydroxysuccinimide (NHS) (361.2 mg, 3.14 mmol) was added. The suspension was again stirred until complete dissolution of NHS, cooled back to room temperature and, after the addition of dicyclohexylcarbodiimide (DCC) (827.1 mg, 4.01 mmol), stirred for another 3 h. The formed urea precipitate was removed by vacuum filtration and the filtrate was concentrated under reduced pressure. The residual solid was washed several times with diethyl ether, before drying it again under reduced pressure. The crude biotin-NHS ester (965.3 mg, 92.1%) was obtained as a colorless solid and used without further purification in follow-up reactions. <sup>1</sup>H NMR (300.0 MHz, DMSO-d<sub>6</sub>): δ [ppm] = 6.42 (s, 1H), 6.36 (s, 1H), 4.35-4.26 (m, 1H), 4.18-4.11 (m, 1H), 3.15-3.06 (m, 1H), 2.90-2.82 (m, 1H), 2.81 (s, 4H), 2.67 (t, J = 7.4 Hz, 2H), 2.58 (d, J = 12.4 Hz, 1H), 1.77-1.38 (m, 6H).

**3-Picolylamine-biotin conjugate (3PAB).** Biotin-NHS ester (400.0 mg, 1.17 mmol) was dissolved in DMF (30.0 mL). Triethylamine (408.3 μL, 2.93 mmol) was added and the solution incubated at room temperature for 5 min before addition of 3-picolylamine (120.0 μL, 1.18 mmol). The reaction mixture was stirred for over 3 h and product formation was monitored by NP-TLC (*R<sub>f</sub>* = 0.15, SiO<sub>2</sub>, DCM/MeOH 9:1). The solvent was evaporated under reduced pressure, the residual solid re-dissolved in MeOH and mixed with Celite® 545. The methanol was removed and the crude product, adsorbed on Celite® 545, was purified by silica column chromatography (DCM/MeOH 9:1). The solvent was evaporated under reduced pressure, which yielded the product as an off-white solid (378.5 mg, 96.6%). <sup>1</sup>H NMR (499.9 MHz, DMSO-d<sub>6</sub>): δ [ppm] = 8.46 (dd, J = 2.4, 0.9 Hz, 1H), 8.44 (dd, J = 4.8, 1.7 Hz, 1H), 8.37 (t, J = 6.0 Hz, 1H), 7.63 (ddd, J = 7.8, 2.4, 1.7 Hz, 1H), 7.34 (ddd, J = 7.8, 4.8, 0.9 Hz, 1H), 6.42 (s, 1H), 6.36 (s, 1H), 4.30 (ddt, J = 7.8, 5.2, 1.1 Hz, 1H), 4.27 (d, J = 5.9 Hz, 2H), 4.12 (ddd, J = 7.7, 4.4, 2.0 Hz, 1H), 3.09 (ddd, J = 8.6, 6.1, 4.4 Hz, 1H), 2.82 (dd, J = 12.4, 5.2 Hz, 1H), 2.58 (d, J = 12.4 Hz, 1H), 2.14 (t, J = 7.5 Hz, 2H), 1.66-1.25 (m, 6H). <sup>13</sup>C NMR (125.7 MHz, DMSO-d<sub>6</sub>): δ [ppm] = 172.2 (1C), 162.7 (1C), 148.7 (1C), 148.0 (1C), 135.2 (1C), 134.9 (1C), 123.4 (1C), 61.0 (1C), 59.2 (1C), 55.4 (1C), 39.8 (1C), 39.7 (1C), 35.1 (1C), 28.2 (1C), 28.0 (1C), 25.2 (1C). HR-MS (ESI, positive): *m/z* calculated for C<sub>16</sub>H<sub>22</sub>N<sub>4</sub>O<sub>2</sub>S, 335.1536 [M+H]<sup>+</sup>, 357.1356 [M+Na]<sup>+</sup>; found, 335.1520, 357.1344.

**4-Picolylamine-biotin conjugate (4PAB).** Biotin-NHS ester (400.0 mg, 1.17 mmol) was dissolved in DMF (30.0 mL). Triethylamine (408.3 μL, 2.93 mmol) was added and the solution incubated at room temperature for 5 min before addition of 4-picolylamine (120.0 μL, 1.18 mmol). The reaction mixture was stirred for over 3 h and product formation was monitored by NP-TLC (*R<sub>f</sub>* = 0.15, SiO<sub>2</sub>, DCM/MeOH 9:1). The solvent was evaporated under reduced pressure, the residual solid re-dissolved in MeOH and mixed with Celite® 545. The methanol was removed and the crude product, adsorbed on Celite® 545, was purified by silica column chromatography (DCM/MeOH 9:1). The solvent was evaporated under reduced pressure, which yielded the product as an off-white solid (342.6 mg, 87.4%). <sup>1</sup>H NMR (499.9 MHz, DMSO-d<sub>6</sub>): δ [ppm] = 8.48 (dd, J = 4.4, 1.8 Hz, 2H), 8.42 (t, J = 6.1 Hz, 1H), 7.22 (dd, J = 4.4, 1.9 Hz, 2H), 6.43 (s, 1H), 6.36 (s, 1H), 4.33-4.29 (m, 1H), 4.28 (d, J = 6.1 Hz, 2H), 4.15-4.11 (m, 1H), 3.14-3.05 (m, 1H), 2.83 (dd, J = 12.5, 5.1 Hz, 1H), 2.58 (d, J = 12.5 Hz, 1H), 2.18 (t,

J = 7.4 Hz, 2H), 1.68-1.27 (m, 6H).  $^{13}\text{C}$  NMR (125.7 MHz, DMSO- $d_6$ ):  $\delta$  [ppm] = 172.4 (1C), 162.7 (1C), 149.5 (2C), 148.7 (1C), 122.0 (2C), 61.0 (1C), 59.2 (1C), 55.4 (1C), 41.0 (1C), 39.8 (1C), 35.1 (1C), 28.2 (1C), 28.0 (1C), 25.2 (1C). HR-MS (ESI, positive):  $m/z$  calculated for  $\text{C}_{16}\text{H}_{22}\text{N}_4\text{O}_2\text{S}$ , 335.1536  $[\text{M}+\text{H}]^+$ , 357.1356  $[\text{M}+\text{Na}]^+$ ; found, 335.1541, 357.1359.

**Desthiobiotin-NHS ester.** Anhydrous DMF (20.0 mL) was heated to 65 °C in a Schlenk flask under argon atmosphere. Desthiobiotin (500.0 mg, 2.33 mmol) was dissolved in the hot DMF and, after full dissolution, *N*-hydroxysuccinimide (NHS) (215.7 mg, 1.87 mmol) was added. The suspension was again stirred until complete dissolution of NHS, cooled back to room temperature and, after the addition of dicyclohexylcarbodiimide (DCC) (482.4 mg, 2.34 mmol), stirred for another 3 h. The formed urea precipitate was removed by vacuum filtration and the filtrate was concentrated under reduced pressure. The residual solid was washed several times with diethyl ether, before drying it again under reduced pressure. The crude desthiobiotin-NHS ester (567.1 mg (only 80% activated according to the  $^1\text{H}$  NMR spectrum), 65.8%) was obtained as a colorless solid and used without further purification in follow-up reactions.  $^1\text{H}$  NMR (300.0 MHz, DMSO- $d_6$ ):  $\delta$  [ppm] = 6.30 (s, 1H), 6.11 (s, 1H), 3.67-3.55 (m, 1H), 3.53-3.43 (m, 1H), 2.81 (s, 4H), 2.66 (t, J = 7.2 Hz, 2H), 1.62 (quin, J = 7.2 Hz, 2H), 1.42-1.15 (m, 6H), 0.96 (d, J = 6.4 Hz, 3H).

**3-Picolylamine-desthiobiotin conjugate (3PADB).** Desthiobiotin-NHS ester (255.0 mg, 0.82 mmol) was dissolved in DMF (22.0 mL). Triethylamine (285.0  $\mu\text{L}$ , 2.04 mmol) was added and the solution incubated at room temperature for 5 min before addition of 3-picolylamine (85.0  $\mu\text{L}$ , 0.83 mmol). The reaction mixture was stirred for over 3 h and product formation was monitored by NP-TLC ( $R_f$  = 0.19,  $\text{SiO}_2$ , DCM/MeOH 9:1). The solvent was evaporated under reduced pressure, the residual solid re-dissolved in MeOH and mixed with Celite® 545. The methanol was removed and the crude product, adsorbed on Celite® 545, was purified by silica column chromatography (DCM/MeOH 9:1). The solvent was evaporated under reduced pressure, which yielded the product as a clear, slightly yellow, highly viscous oil (170.4 mg, 85.4%).  $^1\text{H}$  NMR (499.9 MHz, DMSO- $d_6$ ):  $\delta$  [ppm] = 8.46 (dd, J = 2.4, 0.8 Hz, 1H), 8.44 (dd, J = 4.8, 1.7 Hz, 1H), 8.35 (t, J = 6.1 Hz, 1H), 7.63 (ddd, J = 7.8, 2.3, 1.7 Hz, 1H), 7.34 (ddd, J = 7.8, 4.8, 0.8 Hz, 1H), 6.29 (s, 1H), 4.27 (d, J = 6.0 Hz, 2H), 4.27 (d, J = 6.0 Hz, 2H), 3.60 (dq, J = 7.2, 6.5 Hz, 1H), 3.49-3.43 (m, 1H), 2.13 (t, J = 7.4 Hz, 2H), 1.51 (quin, J = 7.4 Hz, 2H), 1.38-1.13 (m, 6H), 0.95 (d, J = 6.5 Hz, 3H).  $^{13}\text{C}$  NMR (125.7 MHz, DMSO- $d_6$ ):  $\delta$  [ppm] = 172.3 (1C), 162.8 (1C), 148.7 (1C), 148.0 (1C), 135.2 (1C), 135.0 (1C), 123.4 (1C), 54.9 (1C), 50.2 (1C), 39.7 (1C), 35.2 (1C), 29.5 (1C), 28.7 (1C), 25.5 (1C), 25.1 (1C), 15.5 (1C). HR-MS (ESI, positive):  $m/z$  calculated for  $\text{C}_{16}\text{H}_{24}\text{N}_4\text{O}_2$ , 305.1972  $[\text{M}+\text{H}]^+$ , 327.1791  $[\text{M}+\text{Na}]^+$ ; found, 305.1970, 327.1794.

**4-Picolylamine-desthiobiotin conjugate (4PADB).** Desthiobiotin-NHS ester (270.0 mg, 0.87 mmol) was dissolved in DMF (22.0 mL). Triethylamine (300.0  $\mu\text{L}$ , 2.15 mmol) was added and the solution incubated at room temperature for 5 min before addition of 4-picolylamine (90.0  $\mu\text{L}$ , 0.89 mmol). The reaction mixture was stirred for over 3 h and product formation was monitored by NP-TLC ( $R_f$  = 0.19,  $\text{SiO}_2$ , DCM/MeOH 9:1). The solvent was evaporated under reduced pressure, the residual solid re-dissolved in MeOH and mixed with Celite® 545. The methanol was removed and the crude product, adsorbed on Celite® 545, was purified by silica column chromatography (DCM/MeOH 9:1). The solvent was evaporated under reduced pressure, which yielded the product as a clear, slightly yellow, highly viscous oil (189.1 mg, 89.5%).  $^1\text{H}$  NMR (499.9 MHz, DMSO- $d_6$ ):  $\delta$  [ppm] = 8.48 (dd, J = 4.4, 1.8 Hz, 2H), 8.40 (t, J = 6.2 Hz, 1H), 7.22 (dd, J = 4.4, 1.8 Hz, 2H), 6.30 (s, 1H), 6.12 (s, 1H), 4.27 (d, J = 6.2 Hz, 2H), 3.60 (dq, J = 7.1, 6.5 Hz, 1H), 3.50-3.45 (m, 1H), 2.16 (t, J = 7.4 Hz, 2H), 1.53 (quin, J = 7.4 Hz, 2H), 1.40-1.15 (m, 6H), 0.96 (d, J = 6.5 Hz, 3H).  $^{13}\text{C}$  NMR (125.7 MHz, DMSO- $d_6$ ):  $\delta$  [ppm] = 172.4 (1C), 162.8 (1C), 149.4 (2C), 148.7 (1C), 122.0 (2C), 54.9 (1C), 50.2 (1C), 41.0 (1C),

35.2 (1C), 29.5 (1C), 28.7 (1C), 25.5 (1C), 25.1 (1C), 15.5 (1C). HR-MS (ESI, positive):  $m/z$  calculated for  $C_{16}H_{24}N_4O_2$ , 305.1972  $[M+H]^+$ , 327.1791  $[M+Na]^+$ ; found, 305.1965, 327.1788.

**Nicotinic acid-NHS ester.** Anhydrous DMF (30.0 mL) in a Schlenk flask was put under argon atmosphere. Nicotinic acid (498.5 mg, 4.05 mmol) was dissolved in the DMF and, after full dissolution, *N*-hydroxysuccinimide (NHS) (475.2 mg, 4.13 mmol) was added. The suspension was again stirred until complete dissolution of NHS and, after the addition of dicyclohexylcarbodiimide (DCC) (1085.2 mg, 5.26 mmol), stirred for another 5 h. The formed urea precipitate was removed by vacuum filtration and the filtrate was concentrated under reduced pressure. The residual solid was washed several times with diethyl ether, before drying it again under reduced pressure. The crude nicotinic acid-NHS ester (809.4 mg, 90.8%) was obtained as a colorless solid and used without further purification in follow-up reactions.  $^1H$  NMR (300.0 MHz,  $CDCl_3$ ):  $\delta$  [ppm] = 9.32 (dd,  $J$  = 2.3, 0.9 Hz, 1H), 8.88 (dd,  $J$  = 4.9, 1.7 Hz, 1H), 8.38 (dt,  $J$  = 8.0, 2.0 Hz, 1H), 7.47 (ddd,  $J$  = 8.0, 4.9, 1.0 Hz, 1H), 2.92 (s, 4H).  $^{13}C$  NMR (75.4 MHz,  $CDCl_3$ ):  $\delta$  [ppm] = 169.0 (2C), 160.9 (1C), 155.3 (1C), 151.6 (1C), 137.9 (1C), 123.8 (1C), 121.8 (1C), 25.8 (2C).

***tert*-Butyl (1-oxo-1-(pyridin-3-yl)-6,9,12-trioxa-2-azapentadecan-15-yl)carbamate (nicotinamide-(PEG)<sub>3</sub>-NH-Boc).** Nicotinic acid-NHS ester (369.5 mg, 1.68 mmol) was dissolved in anhydrous DMF (25.0 mL) in a Schlenk flask under argon atmosphere. Triethylamine (560.0  $\mu$ L, 4.02 mmol) was added and the solution incubated at room temperature for 2 min before addition of *N*-Boc-4,7,10-trioxa-1,13-tridecanediamine (517.5 mg, 1.62 mmol). The reaction mixture was stirred for 3 h. The solvent was evaporated under reduced pressure, the residual solid re-dissolved in MeOH and mixed with Celite® 545. The methanol was removed and the crude product, adsorbed on Celite® 545, was purified by silica column chromatography (DCM/MeOH 19:1). The solvent was evaporated under reduced pressure, which yielded the product as a dark yellowish, highly viscous oil (629.9 mg, 91.7%).  $^1H$  NMR (300.0 MHz,  $CD_3OD$ ):  $\delta$  [ppm] = 8.99 (dd,  $J$  = 2.3, 1.0 Hz, 1H), 8.69 (dd,  $J$  = 4.9, 1.6 Hz, 1H), 8.28 (ddd,  $J$  = 8.0, 2.3, 1.7 Hz, 1H), 7.56 (ddd,  $J$  = 8.1, 4.9, 1.0 Hz, 1H), 3.70-3.46 (m, 14H), 3.53 (t,  $J$  = 5.6 Hz, 2H), 3.17-3.08 (m, 2H), 1.92 (quin,  $J$  = 6.8 Hz, 2H), 1.72 (quin,  $J$  = 6.5 Hz, 2H), 1.44 (s, 9H).  $^{13}C$  NMR (75.4 MHz,  $CD_3OD$ ):  $\delta$  [ppm] = 174.9 (1C), 167.6 (1C), 152.6 (1C), 149.1 (1C), 137.0 (1C), 132.1 (1C), 125.1 (1C), 71.5 (1C), 71.5 (1C), 71.3 (1C), 71.2 (1C), 70.1 (1C), 69.9 (1C), 38.8 (2C), 30.9 (1C), 30.3 (1C), 28.8 (3C), 26.3 (1C).

***N*-(3-(2-(2-(3-Aminopropoxy)ethoxy)ethoxy)propyl)nicotinamide (nicotinamide-(PEG)<sub>3</sub>-NH<sub>2</sub>).** Trifluoroacetic acid (TFA) (2.5 mL) was added to nicotinamide-(PEG)<sub>3</sub>-NH-Boc (625.0 mg, 1.47 mmol) and the mixture reacted at 0 °C for 30 min. TFA was removed under reduced pressure using a rotary evaporator placed in a fume hood. Small volumes of MeOH were added to the residue and removed under reduced pressure, repeatedly. Successful deprotection was confirmed by NMR spectroscopy, which showed a complete disappearance of the  $CH_3$ -group signal from the Boc-protecting group (in  $CD_3OD$ :  $\delta$  [ppm] = 1.44). The crude product was obtained as a yellowish oil and used without further purification in the follow-up reaction to obtain N(PEG)<sub>3</sub>B.  $^1H$  NMR (300.0 MHz,  $CD_3OD$ ):  $\delta$  [ppm] = 9.13 (dd,  $J$  = 2.2, 0.9 Hz, 1H), 8.85 (dd,  $J$  = 5.4, 1.5 Hz, 1H), 8.63 (ddd,  $J$  = 8.1, 2.2, 1.5 Hz, 1H), 7.89 (ddd,  $J$  = 8.1, 5.3, 0.8 Hz, 1H), 3.70-3.56 (m, 12H), 3.56-3.49 (m, 2H), 3.11 (m, 2H), 1.98-1.87 (m, 4H).

**Nicotinamide-(PEG)<sub>3</sub>-biotin conjugate (N(PEG)<sub>3</sub>B).** Biotin-NHS ester (511.2 mg, 1.50 mmol) and triethylamine (2.05 mL, 14.71 mmol) were dissolved in anhydrous DMF (12.5 mL) and incubated for 5 min at room temperature, before adding to a solution of crude, Boc-deprotected nicotinamide-(PEG)<sub>3</sub>-NH<sub>2</sub> (1.47 mmol) in anhydrous DMF (12.5 mL). The reaction mixture was stirred for 3 h. The solvent was evaporated under reduced pressure, the residual solid re-dissolved in MeOH and mixed with Celite® 545. The methanol was removed and the crude product, adsorbed on Celite® 545, was purified by silica column chromatography (DCM/MeOH

19:1). The solvent was evaporated under reduced pressure, which yielded the product as a slightly yellow, highly viscous oil (552.0 mg, 68.1%). <sup>1</sup>H NMR (300.0 MHz, DMSO-d<sub>6</sub>): δ [ppm] = 8.98 (dd, J = 2.3, 0.8 Hz, 1H), 8.69 (dd, J = 4.8, 1.7 Hz, 1H), 8.64 (t, J = 5.7 Hz, 1H), 8.17 (dt, J = 7.9, 2.0 Hz, 1H), 7.74 (t, J = 5.7 Hz, 1H), 7.49 (ddd, J = 8.0, 4.8, 1.0 Hz, 1H), 6.41 (s, 1H), 6.35 (s, 1H), 4.30 (dd, J = 7.8, 5.1 Hz, 1H), 4.16-4.05 (m, 1H), 3.58-3.42 (m, 10H), 3.41-3.30 (m, 4H), 3.14-3.02 (m, 3H), 2.81 (dd, J = 12.4, 5.1 Hz, 1H), 2.57 (d, J = 12.4 Hz, 1H), 2.04 (t, J = 7.4 Hz, 2H), 1.76 (quin, J = 6.4 Hz, 2H), 1.60 (quin, J = 6.6 Hz, 2H), 1.55-1.21 (m, 6H). <sup>13</sup>C NMR (75.4 MHz, DMSO-d<sub>6</sub>): δ [ppm] = 171.9 (1C), 164.7 (1C), 162.7 (1C), 151.7 (1C), 148.3 (1C), 134.9 (1C), 130.0 (1C), 123.4 (1C), 61.0 (1C), 59.2 (1C), 55.4 (1C), 69.8 (1C), 69.8 (1C), 69.6 (1C), 69.5 (1C), 68.2 (1C), 68.1 (1C), 39.8 (1C), 36.7 (1C), 35.7 (1C), 35.2 (1C), 29.4 (1C), 29.3 (1C), 28.2 (1C), 28.1 (1C), 25.3 (1C). HR-MS (ESI, positive): m/z calculated for C<sub>26</sub>H<sub>41</sub>N<sub>5</sub>O<sub>6</sub>S, 552.2850 [M+H]<sup>+</sup>, 574.2670 [M+Na]<sup>+</sup>; found, 552.2857, 574.2481.

**tert-Butyl (1-oxo-1-(pyridin-3-yl)-5,8,11,14,17,20,23,26,29,32,35-undeca-2-azaheptatriacontan-37-yl)carbamate (nicotinamide-(PEG)<sub>11</sub>-NH-Boc).** Nicotinic acid-NHS ester (180.5 mg, 0.82 mmol) was dissolved in anhydrous DMF (20.0 mL) in a Schlenk flask under argon atmosphere. Triethylamine (270.0 μL, 1.94 mmol) was added and the solution incubated at room temperature for 2 min before addition of O-(2-aminoethyl)-O'-2-(Boc-amino)ethyldecaethylene glycol (500.0 mg, 0.78 mmol). The reaction mixture was stirred for 6 h. The solvent was evaporated under reduced pressure, the residual solid re-dissolved in MeOH and mixed with Celite® 545. The methanol was removed and the crude product, adsorbed on Celite® 545, was purified by silica column chromatography (DCM/MeOH 19:1). The solvent was evaporated under reduced pressure, which yielded the product as a pale yellow oil (461.2 mg, 79.3%). <sup>1</sup>H NMR (300.0 MHz, CD<sub>3</sub>OD): δ [ppm] = 9.01 (dd, J = 2.3, 1.0 Hz, 1H), 8.71 (dd, J = 4.9, 1.7 Hz, 1H), 8.28 (ddd, J = 8.0, 2.3, 1.6 Hz, 1H), 7.57 (ddd, J = 8.0, 4.9, 1.0 Hz, 1H), 3.72-3.60 (m, 44H), 3.53 (t, J = 5.6 Hz, 2H), 3.23 (td, J = 5.6, 1.6 Hz, 2H), 1.46 (s, 9H). <sup>13</sup>C NMR (75.4 MHz, CD<sub>3</sub>OD): δ [ppm] = 173.4 (1C), 166.4 (1C), 151.2 (1C), 147.8 (1C), 135.7 (1C), 130.6 (1C), 123.7 (1C), 78.6 (1C), 70.5-69.5 (PEG), 39.9 (PEG), 39.7 (PEG), 27.4 (3C), 24.9 (1C).

**N-(35-amino-3,6,9,12,15,18,21,24,27,30,33-undeca-oxapentatriacontyl)nicotinamide (nicotinamide-(PEG)<sub>11</sub>-NH<sub>2</sub>).** Trifluoroacetic acid (TFA) (2.5 mL) was added to nicotinamide-(PEG)<sub>11</sub>-NH-Boc (450.2 mg, 0.60 mmol) and the mixture reacted at 0 °C for 30 min. TFA was removed under reduced pressure using a rotary evaporator placed in a fume hood. Small volumes of MeOH were added to the residue and removed under reduced pressure, repeatedly. Successful deprotection was confirmed by NMR spectroscopy, which showed a complete disappearance of the CH<sub>3</sub>-group signal from the Boc-protecting group (in CD<sub>3</sub>OD: δ [ppm] = 1.44). The crude product was obtained as a colorless solid and used without further purification in the follow-up reaction to obtain N(PEG)<sub>11</sub>B. <sup>1</sup>H NMR (300.0 MHz, CD<sub>3</sub>OD): δ [ppm] = 9.14 (dd, J = 2.2, 0.9 Hz, 1H), 8.86 (dd, J = 5.5, 1.5 Hz, 1H), 8.69 (dt, J = 8.1, 1.8 Hz, 1H), 7.93 (ddd, J = 8.1, 5.5, 0.9 Hz, 1H), 3.76-3.70 (m, 2H), 3.70-3.55 (m, 44H), 3.17-3.10 (m, 2H).

**Nicotinamide-(PEG)<sub>11</sub>-biotin conjugate (N(PEG)<sub>11</sub>B).** Biotin-NHS ester (205.2 mg, 0.60 mmol) and triethylamine (0.84 mL, 6.03 mmol) were dissolved in anhydrous DMF (10.0 mL) and incubated for 5 min at room temperature, before adding to a solution of crude, Boc-deprotected nicotinamide-(PEG)<sub>11</sub>-NH<sub>2</sub> (0.60 mmol) in anhydrous DMF (10.0 mL). The reaction mixture was stirred for 16 h. The solvent was evaporated under reduced pressure, the residual solid re-dissolved in MeOH and mixed with Celite® 545. The methanol was removed and the crude product, adsorbed on Celite® 545, was purified by silica column chromatography (DCM/MeOH 9:1) and then again by a second silica column chromatography (DCM/MeOH 19:1). The solvent was evaporated under reduced pressure, which yielded the product as a faint yellow, highly viscous oil (207.3 mg, 39.4%). <sup>1</sup>H NMR (300.0 MHz, DMSO-d<sub>6</sub>): δ [ppm] =

9.00 (dd,  $J = 2.3, 0.8$  Hz, 1H), 8.77 (t,  $J = 5.6$  Hz, 1H), 8.69 (dd,  $J = 4.8, 1.7$  Hz, 1H), 8.19 (dt,  $J = 7.9, 2.0$  Hz, 1H), 7.84 (t,  $J = 5.7$  Hz, 1H), 7.50 (ddd,  $J = 8.0, 4.8, 0.9$  Hz, 1H), 6.41 (s, 1H), 6.35 (s, 1H), 4.30 (dd,  $J = 7.8, 5.1$  Hz, 1H), 4.15–4.10 (m, 1H), 3.58–3.43 (m, 44H), 3.41–3.36 (m, 2H), 3.20–3.15 (m, 2H), 3.12–3.06 (m, 1H), 2.81 (dd,  $J = 12.4, 5.1$  Hz, 1H), 2.57 (d,  $J = 12.3$  Hz, 1H), 2.06 (t,  $J = 7.3$  Hz, 2H), 1.68–1.25 (m, 6 H).  $^{13}\text{C}$  NMR (75.4 MHz, DMSO- $d_6$ ):  $\delta$  [ppm] = 172.1 (1C), 164.8 (1C), 162.7 (1C), 151.8 (1C), 148.4 (1C), 134.9 (1C), 129.8 (1C), 123.4 (1C), 61.0 (1C), 59.2 (1C), 55.4 (1C), 69.8–69.5 (multiple C), 69.2 (1C), 68.8 (1C), 45.4 (1C), 38.4 (1C), 35.1 (1C), 28.2 (1C), 28.0 (1C), 25.3 (1C). HR-MS (ESI, positive):  $m/z$  calculated for  $\text{C}_{40}\text{H}_{69}\text{N}_5\text{O}_{14}\text{S}$ , 552.2850  $[\text{M}+\text{H}]^+$ , 574.2670  $[\text{M}+\text{Na}]^+$ ; found, 552.2857, 574.2481.

**((2*R*,3*S*,4*R*,5*R*)-5-(6-amino-9*H*-purin-9-yl)-3,4-dihydroxytetrahydrofuran-2-yl)methyl (1*H*-imidazol-1-yl)phosphonate (ImpA).** The synthesis of ImpA was adapted from a literature protocol(58). Adenosine 5'-monophosphate monohydrate (5'-AMP) (421.4 mg, 1.15 mmol) was suspended in anhydrous DMF (3 mL) and added dropwise to a stirred solution of imidazole (519.9 mg, 7.64 mmol), 2,2'-dithiopyridine (613.0 mg, 2.78 mmol), triphenylphosphine (721.1 mg, 2.75 mmol) and triethylamine (460  $\mu\text{L}$ , 3.30 mmol) in anhydrous DMF (9 mL). After approximately 10 min of reaction time, the suspension turned clear. The resulting solution was further stirred at room temperature for 3 h and poured into a cooled solution (0  $^\circ\text{C}$ ) of sodium perchlorate (143.8 mg, 1.17 mmol) in anhydrous acetone (100 mL). The product was precipitated at 0  $^\circ\text{C}$  for 1 h and collected by centrifugation (4000 g, 5 min, 15  $^\circ\text{C}$ ). The pellet was washed with acetone (3 x 10 mL) and diethyl ether (10 mL). Residual solvent was evaporated and the solid product further lyophilized, which yielded ImpA as sodium salt as a colorless solid (466.2 mg, 96.4%). The substance was stored in an argon-flushed Schlenk container at -20  $^\circ\text{C}$  for extended periods of time.  $^1\text{H}$  NMR (499.9 MHz, DMSO- $d_6$ ):  $\delta$  [ppm] = 8.39 (s, 1H), 8.13 (s, 1H), 7.69 (dd,  $J = 1.2$  Hz, 1H), 7.31 (s, 2H), 7.11 (dd,  $J = 1.2$  Hz, 1H), 6.87 (dd,  $J = 1.2$  Hz), 5.88 (d,  $J = 6.3$  Hz, 1H), 4.58 (dd,  $J = 5.4$  Hz, 1H), 4.04 (dd,  $J = 4.2, 3.3$  Hz, 1H), 3.94 (dt,  $J = 7.2, 3.6$  Hz, 1H), 3.81–3.69 (m, 2H).  $^{13}\text{C}$  NMR (75.5 MHz, DMSO- $d_6$ ):  $\delta$  [ppm] = 155.9 (1C), 152.7 (1C), 149.7 (1C), 135.2 (1C), 128.2 (d, 1C), 121.6 (1C), 118.9 (1C), 86.8 (1C), 83.7 (d, 1C), 73.6 (1C), 70.9 (1C), 64.9 (1C).  $^{31}\text{P}$  NMR (202.3 MHz, DMSO- $d_6$ ):  $\delta$  [ppm] = -9.78 (s, 1P). HR-MS (ESI, positive):  $m/z$  calculated for  $\text{C}_{13}\text{H}_{16}\text{N}_7\text{NaO}_6\text{P}$ , 420.0792  $[\text{M}+\text{H}]^+$ , 442.0611  $[\text{M}+\text{Na}]^+$ ; found, 420.0787, 442.0603. MS (ESI, negative):  $m/z$  calculated for  $\text{C}_{13}\text{H}_{16}\text{N}_7\text{NaO}_6\text{P}$ , 396.0827  $[\text{M}-\text{Na}]^-$ ; found, 396.1.
